# Supplementary material for: Genetic control of DNA methylation is largely shared across European and East Asian populations
Source: PubMed Central journal article supplement (PMC10978881; doi:10.1038/s41467-024-47005-0), 2024-03-28

## Supplementary Material

### **Genetic control of DNA methylation is largely shared across European and East Asian populations**

*Hatton et al*

#### Table of Contents

|                                                                                                 |          |
|-------------------------------------------------------------------------------------------------|----------|
| <b><i>Supplementary Note 1: Systems Genomics of Parkinson’s Disease Collaborators</i></b> ..... | <b>2</b> |
| <b><i>Supplementary Note 2: Cohort acknowledgements</i></b> .....                               | <b>3</b> |
| Brisbane Systems Genomics Study (BSGS).....                                                     | 3        |
| Lothian Birth Cohorts of 1921 and 1936 (LBC) .....                                              | 3        |
| Systems Genomics of Parkinson’s Disease (SGPD).....                                             | 3        |
| Chinese Motor Neuron Disease Cohort (CHNMND) .....                                              | 3        |
| Tibetan Han Chinese high-altitude (THCH) .....                                                  | 4        |
| <b><i>Supplementary Tables</i></b> .....                                                        | <b>5</b> |
| <b><i>Supplementary Figures</i></b> .....                                                       | <b>8</b> |

## Supplementary Note 1: Systems Genomics of Parkinson's Disease Collaborators

Tim Anderson (New Zealand Brain Research Institute, Christchurch, New Zealand; Department of Medicine, University of Otago, Christchurch, New Zealand), Steven Bentley (Griffith Institute for Drug Discovery, Griffith University, Brisbane, Australia), John Dalrymple-Alford (Dept. Psychology, University of Canterbury, New Zealand Brain Research Institute), Javed Fowdar (Griffith Institute for Drug Discovery, Griffith University, Brisbane, Australia), Jacob Gratten (Mater Research Institute, University of Queensland, Brisbane, Australia), Glenda Halliday (Brain and Mind Centre, Sydney Medical School, University of Sydney, Sydney, Australia), Anjali K. Henders (Institute for Molecular Bioscience, University of Queensland, Brisbane, Australia), Ian Hickie (Brain and Mind Centre, Sydney Medical School, University of Sydney, Sydney, Australia), Irfahan Kassam (Institute for Molecular Bioscience, University of Queensland, Brisbane, Australia), Martin Kennedy (Department of Pathology, University of Otago, Christchurch, New Zealand), John Kwok (Brain and Mind Centre, Sydney Medical School, University of Sydney, Sydney, Australia), Simon Lewis (Brain and Mind Centre, Sydney Medical School, University of Sydney, Sydney, Australia), George Mellick (Griffith Institute for Drug Discovery, Griffith University, Brisbane, Australia), Grant Montgomery (Institute for Molecular Bioscience, University of Queensland, Brisbane, Australia), John Pearson (Department of Pathology, University of Otago, Christchurch, New Zealand), Toni Pitcher (New Zealand Brain Research Institute, Christchurch, New Zealand; Department of Medicine, University of Otago, Christchurch, New Zealand), Julia Sidorenko (Institute for Molecular Bioscience, University of Queensland, Brisbane, Australia), Peter A. Silburn (Queensland Brain Institute, University of Queensland, Brisbane, Australia), Costanza L. Vallerga (Laboratory of Population Genomics, Department of Internal Medicine, Erasmus MC, Rotterdam, The Netherlands), Peter M. Visscher (Institute for Molecular Bioscience, University of Queensland, Brisbane, Australia; Queensland Brain Institute, University of Queensland, Brisbane, Australia), Leanne Wallace, (Institute for Molecular Bioscience, University of Queensland, Brisbane, Australia), Naomi R. Wray (Institute for Molecular Bioscience, University of Queensland, Brisbane, Australia; Queensland Brain Institute, University of Queensland, Brisbane, Australia), Angli Xue (Garvan-Weizmann Centre for Cellular Genomics, Garvan Institute of Medical Research, Sydney, Australia; School of Biomedical Sciences, University of New South Wales, Sydney, Australia), Jian Yang (Institute for Molecular Bioscience, University of Queensland, Brisbane, Australia; Queensland Brain Institute, University of Queensland, Brisbane, Australia), Futao Zhang (Institute for Molecular Bioscience, University of Queensland, Brisbane, Australia)

## Supplementary Note 2: Cohort acknowledgements

### Brisbane Systems Genomics Study (BSGS)

The study samples were collected in the context of the BSGS within the Brisbane Longitudinal Twin Study 1992-2016. This work was supported by the Australian National Health and Medical Research Council (NHMRC) (project grant 1087407, 1031119, 1010374, 496667 and 1046880), the National Institutes of Health (NIH) (grants GM057091 and GM099568), Australian Research Council (A7960034, A79906588, A79801419, DP0212016, DP0343921, DP1093900) and NHMRC Medical Bioinformatics Genomics Proteomics Program (grant 389891) for building and maintaining the adolescent twin family resource, through which samples were collected. We gratefully acknowledge the participation of the twins and their families. We thank Marlene Grace, Ann Eldridge, and Kerrie McAloney for sample collection and processing and the staff of the Molecular Epidemiology Laboratory at QIMR for DNA sample processing and preparation.

### Lothian Birth Cohorts of 1921 and 1936 (LBC)

The authors thank all LBC1921 and LBC1936 study participants and research team members who have contributed, and continue to contribute, to ongoing studies. LBC1921 was supported by the UK's Biotechnology and Biological Sciences Research Council (BBSRC), The Royal Society, and The Chief Scientist Office of the Scottish Government. LBC1936 is supported by the BBSRC, and the Economic and Social Research Council [BB/W008793/1] (which supports SEH), Age UK (Disconnected Mind project), and the University of Edinburgh. SRC is supported by a Sir Henry Dale Fellowship jointly funded by the Wellcome Trust and the Royal Society (221890/Z/20/Z). Genotyping of the cohorts was funded by the BBSRC (BB/F019394/1). Methylation typing was supported by Centre for Cognitive Ageing and Cognitive Epidemiology (Pilot Fund award), Age UK, The Wellcome Trust Institutional Strategic Support Fund, The University of Edinburgh, and The University of Queensland.

### Systems Genomics of Parkinson's Disease (SGPD)

We thank all SGPD participants for donating their time, data, and biological samples, without which this study would not have been possible. This research was supported by the National Health and Medical Research Council (NHMRC: 1078037, 1078901, 1103418, 1107258, 1127440, 1113400), the Australian Research Council (ARC: DP160102400 and FT180100186) and the Mater Foundation. Support also came from ForeFront, a large collaborative research group dedicated to the study of neurodegenerative diseases and funded by the NHMRC (Program Grant 1132524, Dementia Research Team Grant 1095127, NeuroSleep Centre of Research Excellence 1060992) and ARC (Centre of Excellence in Cognition and its Disorders Memory Program CE10001021). The Queensland Parkinson's Project (QPP) was supported by a grant from the Australian National Health and Medical Research Council (1084560). The New Zealand Brain Research Institute (NZBRI) cohort was funded by a University of Otago Research Grant, together with financial support from the Jim and Mary Carney Charitable Trust (Whangarei, New Zealand). We thank Allison Miller for processing and handling of NZBRI samples.

### Chinese Motor Neuron Disease Cohort (CHNMND)

We also thank staff and researchers at the Peking University Third Hospital (Beijing, China) and Matthew A. Brown for their role in generating this dataset.

## Tibetan Han Chinese high-altitude (THCH)

The research was partly supported by the Leading Innovative and Entrepreneur Team Introduction Program of Zhejiang (2021R01013, JY), the National Natural Science Foundation of China (81522014, 82125007, ZBJ) and the Dr Jian Zhou Memorial Scholarship (FFC). We thank the High-Performance Computing Center and the Research Center for Industries of the Future (RCIF) at Westlake University for their assistance in computing.



## Supplementary Tables

### Supplementary Table 1: Characteristics of the study cohorts.

Abbreviations: SGPD, Systems Genomics of Parkinson's Disease; LBC, Lothian Birth Cohorts; BSGS, Brisbane Systems Genomics Study; CHNMND, Chinese Motor Neuron Disease Cohort; THCH, Tibetan-Han Chinese high-altitude; PD, Parkinson's disease; ALS, Amyotrophic lateral sclerosis; EUR, European; EAS, East Asian; DNAm DNA methylation; SNPs, single nucleotide polymorphisms; #, Number; QC, quality control.

| Cohort                        | SGPD                             | LBC                               | BSGS                              | CHNMND                       | THCH                                 |
|-------------------------------|----------------------------------|-----------------------------------|-----------------------------------|------------------------------|--------------------------------------|
| Sample size                   | 1659                             | 1437                              | 605                               | 651                          | 1448                                 |
| Data type                     | PD case-control                  | Longitudinal                      | Familial                          | ALS case-control             | Cohort study                         |
| Ancestry                      | EUR<br>(Australian, New Zealand) | EUR<br>(Scottish)                 | EUR<br>(Australian)               | EAS<br>(Chinese)             | EAS<br>(Chinese)                     |
| DNAm array                    | Illumina 450K                    | Illumina 450K                     | Illumina 450K                     | Illumina 450K                | Illumina 450K                        |
| Genotype array                | Illumina PsychArray-B.bpm        | Illumina 610-Quad Beadchip arrays | Illumina 610-Quad Beadchip arrays | Illumina Human OmniZhong Hua | Illumina HumanCoreE xome-12 BeadChip |
| # SNPs post imputation and QC | 7,664,320                        | 8,297,026                         | 8,240,066                         | 7,330,123                    | 6,461,686                            |

**Supplementary Table 2: Relationship between increase in sample size and reduction in fine mapping causal set size determined via simulation.** Subsets of the UK Biobank (UKB) were selected to match the number of individuals in mQTL cohorts; EUR (n=3,701) and combined across ancestries (n=5,800), as well as increases by 1,000 sample increments (n=6,800, 7,800, 8,800, 9,800). 4,528 mQTLs in the stringent set with the same lead SNP in both ancestries were utilised for simulation, with a single DNAm phenotype simulated for each for mQTL assuming the lead EUR SNP as causal. The resulting mQTLs were fine mapped using SuSiE, with mean credible set size and standard error of the mean (SE) recorded across DNAm probes and UKB subsets and the mean percentage reduction calculated. This has been compared to the observed data for the same mQTLs.

|                     | Sample                 | Mean causal set size (SE) | Mean % reduction                                               |
|---------------------|------------------------|---------------------------|----------------------------------------------------------------|
| Real mQTL data      | EUR n=3,701            | 3.1 (0.04)                |                                                                |
|                     | EAS n=2,099            | 3.3 (0.05)                |                                                                |
|                     | Cross-ancestry n=5,800 | 1.5 (0.01)                | 26.1% compared to EUR n=3,701<br>29.9% compared to EAS n=2,099 |
| Simulated mQTL data | UKB n=3,701            | 2.9 (0.06)                |                                                                |
|                     | UKB n=5,800            | 2.3 (0.05)                | 5.7% compared to UKB n=3,701                                   |
|                     | UKB n=6,800            | 2.2 (0.05)                | 8.4% compared to UKB n=3,701                                   |
|                     | UKB n=7,800            | 2.1 (0.04)                | 11.0% compared to UKB n=3,701                                  |
|                     | UKB n=8,800            | 2.0 (0.04)                | 13.4% compared to UKB n=3,701                                  |
|                     | UKB n=9,800            | 1.9 (0.03)                | 14.7% compared to UKB n=3,701                                  |

**Supplementary Table 3: Identification of ancestry-specific mQTL at 21,084 EUR and 7,841 EAS DNAm probes.** a) EUR and b) EAS ancestry-specific mQTL.

Ancestry-specific mQTLs were identified using the Bonferroni corrected, two-sided p-values threshold of  $p < 10^{-10}$  in the given ancestry and  $p > 10^{-6}$  in the other. P-values were calculated at the cohort level from linear regression and mixed linear regression models, and at the ancestry level using inverse variance-weighted meta-analysis. For a given ancestry, the ancestry specific mQTL are classified by the number of cohorts of that ancestry in which the mQTL was significant prior to meta-analysis.

**a) 21,084 EUR ancestry-specific mQTL**

| # of EUR cohorts     | # DNAm probes with ancestry-specific mQTL (%) |
|----------------------|-----------------------------------------------|
| <i>All 3 cohorts</i> | 1,255 (6.0%)                                  |
| <i>2 cohort</i>      | 5,014 (23.8%)                                 |
| <i>1 cohort</i>      | 7,929 (37.6%)                                 |
| <i>No cohort</i>     | 6,886 (32.7%)                                 |

**b) 7,841 EAS ancestry-specific mQTL**

| # of EAS cohorts    | # DNAm probes with ancestry-specific mQTL (%) |
|---------------------|-----------------------------------------------|
| <i>Both cohorts</i> | 2,250 (28.7%)                                 |
| <i>1 cohort</i>     | 3,252 (41.5%)                                 |
| <i>No cohort</i>    | 2,339 (29.8%)                                 |

## Supplementary Figures

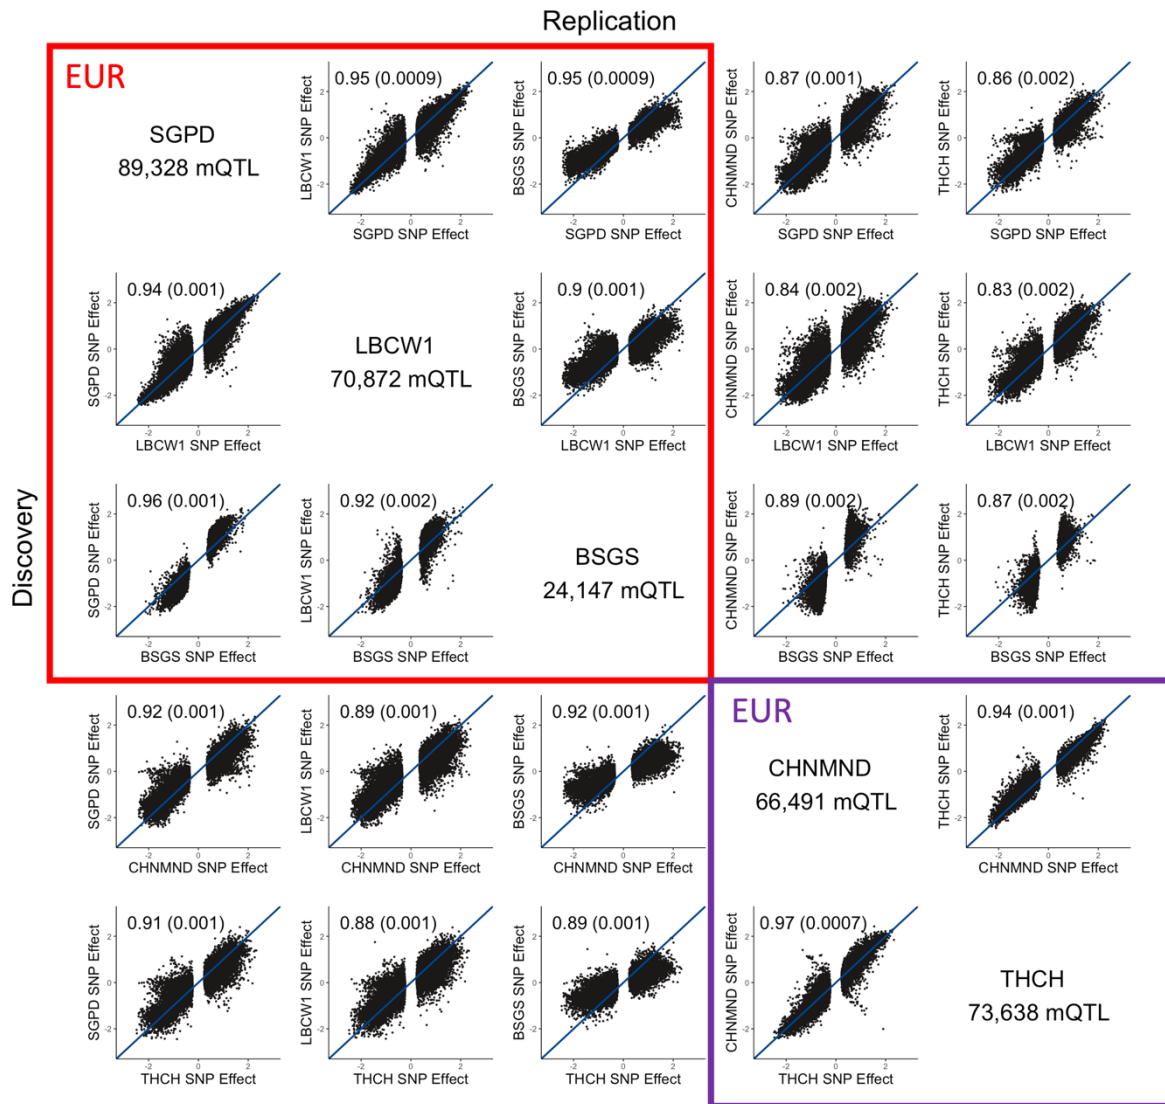

**Supplementary Figure 1: The correlation ( $r_b$ ) of cis-mQTL SNP effects across cohorts.** Shown are effect sizes of the lead SNPs from the discovery cohort and the corresponding SNP effect in the replication cohort. Correlations are presented with corresponding standard errors in parentheses. Cohorts of the same ancestry, boxed in red (EUR) and purple (EAS), have more similar effect sizes than across ancestries.

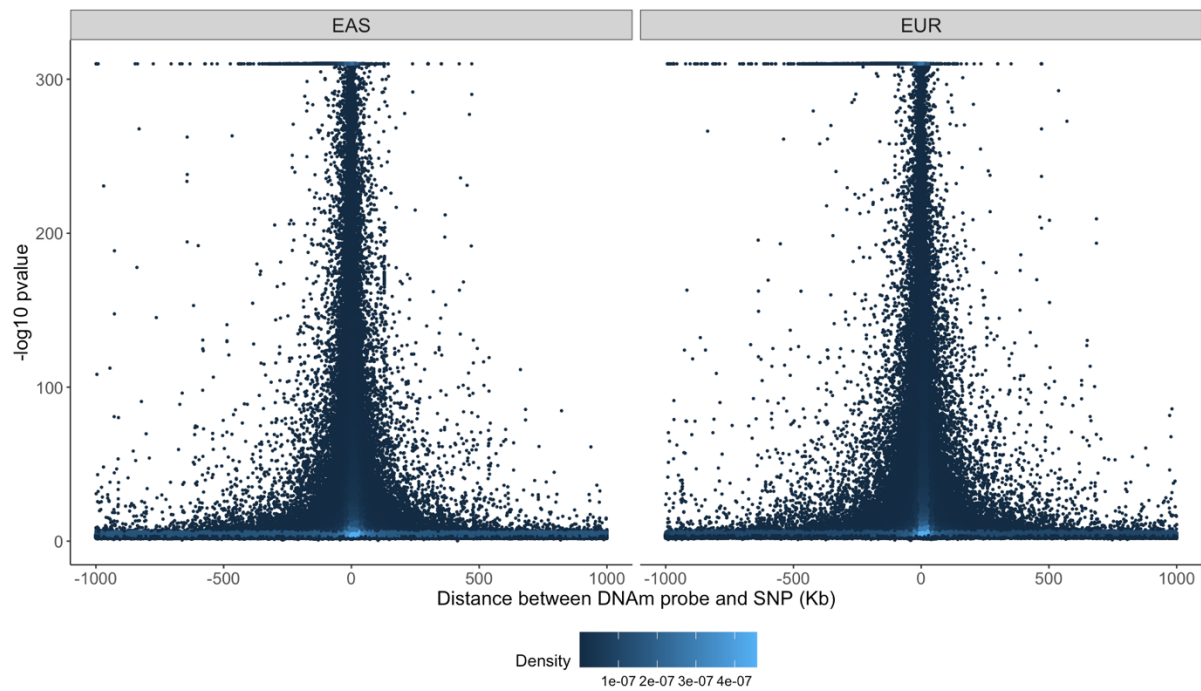

**Supplementary Figure 2: The significance of *cis*-mQTL associations increases as the distance between the genetic variant and DNAm site decreases (n=404,503).** Shown is the relationship for between mQTL significance ( $-\log_{10}$  p-value) and distance between the DNAm probe and genetic variant in each ancestry. The colour of the points reflects the density of observations at that location. The two-sided p-values from an inverse variance-weighted meta-analysis with the the ceiling in  $-\log_{10}$  p-value due to numerical limitations in analysis software.

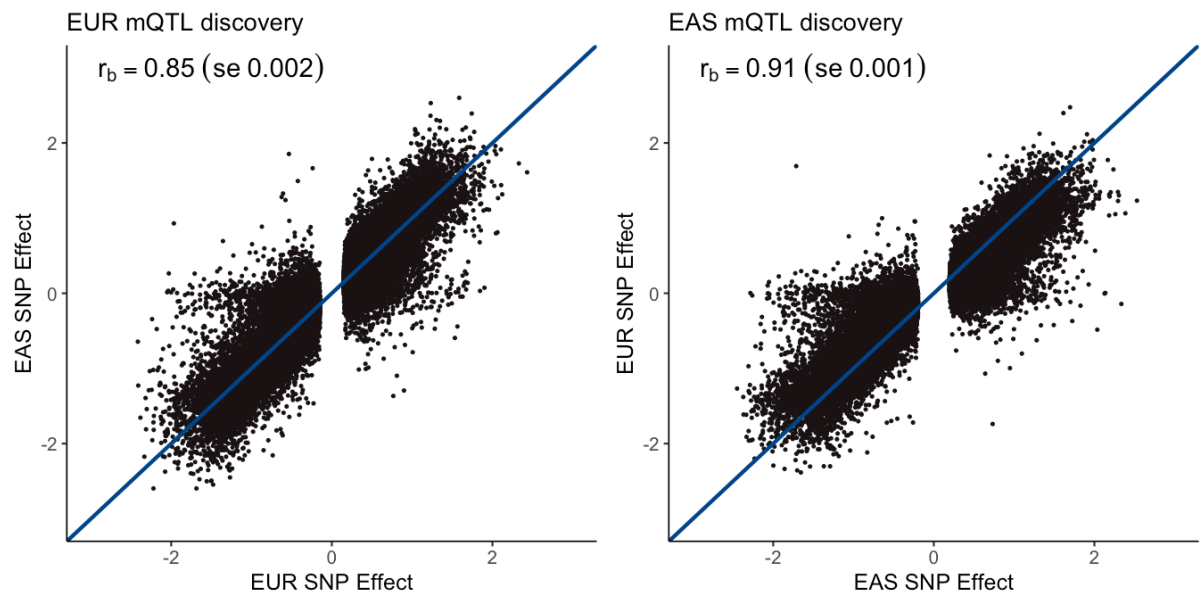

**Supplementary Figure 3: The correlation ( $r_b$ ) of *cis*-mQTL SNP effects between meta-analysed ancestries.** Shown are effect sizes of the lead SNPs from the discovery ancestry and the corresponding SNP effect in the other ancestry. Correlations are presented with corresponding standard errors in parentheses. EUR mQTL discovery (n=113,976), EAS mQTL discovery (n=95,583).

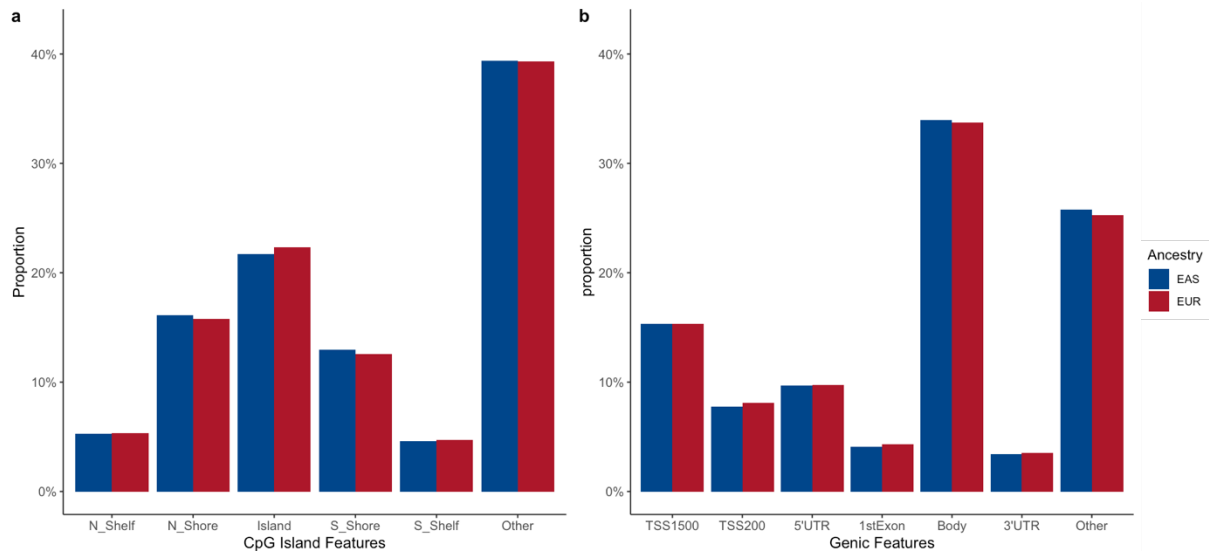

**Supplementary Figure 4: Comparing the distribution of DNAm probes associated with mQTL between genic and CpG island regions by ancestry.** Bar-plots demonstrating the location of DNAm probes with associated mQTL in individuals of EUR ancestry (blue bars; n=113,976) compared to individuals of EAS ancestry (red bars; n=95,583).

a) annotation relative to CpG islands. Shores are defined as island flanking regions ranging to up to 2,000 bp and shelves are defined as island flanking regions ranging from 2,001 bp to 4,000 bp. Northern and southern shores and shelves (noted N\_ and S\_) are respectively defined as the upstream and downstream shores or shelves according to chromosomal coordinates.

b) gene region feature category describing the CpG position. Genic features include Gene features listed include: promoter region ranging from 1 bp to 200 bp upstream of the TSS (TSS200), promoter region ranging from 201 bp to 1,500 bp upstream of the TSS (TSS1500), 5' untranslated region (5'UTR), first exons (1stExon), gene bodies, excluding the 5' and 3' UTRs and first exons (Body) and 3' untranslated region (3'UTR).

We observed no difference in the distribution of DNAm sites associated with mQTLs between ancestries, across genic or CpG island features.

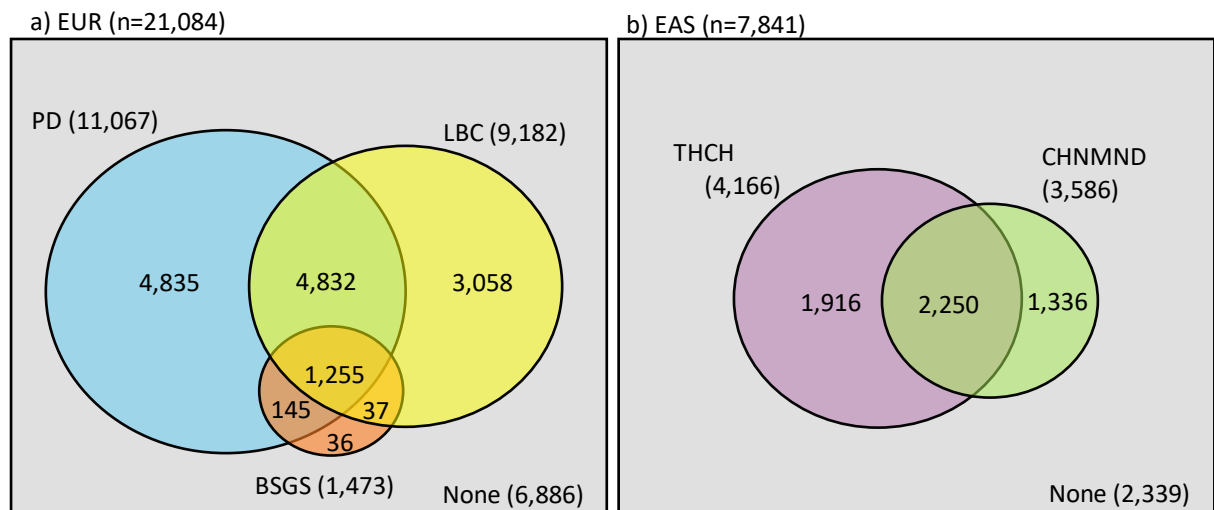

**Supplementary Figure 5: Identification of 21,084 EUR and 7,841 EAS DNAm probes with ancestry-specific mQTL.** Shown is the number of those mQTL-probes which were significant in each of the cohorts of the same ancestry and the overlap between cohorts.



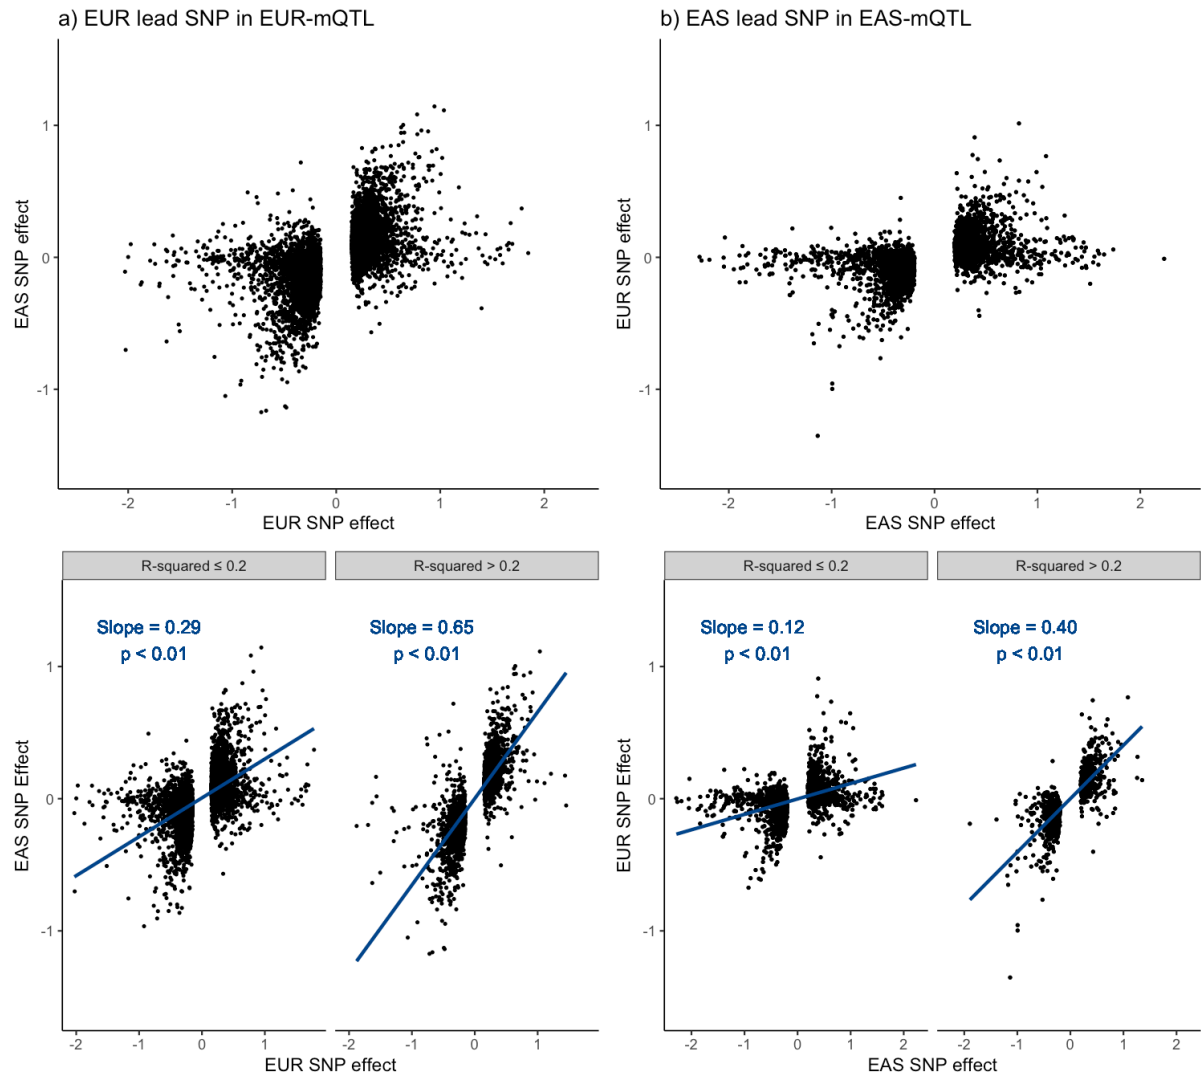

**Supplementary Figure 6: Concordance of lead SNP effects by LD between lead SNPs for a) EUR lead SNP in EUR-mQTL and b) EAS lead SNP in EAS-mQTLs.** Top: Agreement in SNP effects. Bottom: Agreement in SNP effect by LD between lead SNPs. We observe there is greater agreement between SNP effects when there is stronger LD, indicating some residual overlap in effect sizes attributable to mQTL that did not achieve significance due to power constraints.

**Supplementary Figure 7: Manhattan plots of the 163 ancestry-specific pleiotropic associations.**

For each mQTL-trait pair the Manhattan plots display:

- a) mQTL associations in individuals of EUR ancestry
- b) mQTL associations in individuals of EAS ancestry
- c) Trait associations in individuals of EUR ancestry
- d) Trait associations in individuals of EUR ancestry

The blue line indicates the significance threshold ( $p < 10^{-10}$ ) in mQTL analysis, the grey line is the replication threshold ( $p < 10^{-6}$ ), and the green line indicated the significance threshold ( $p < 5 \times 10^{-8}$ ) in GWAS. The SNP highlighted in red is the ancestry-specific lead SNP used as the exposure outcome in SMR analysis.

### Trait A10: probe cg13096128

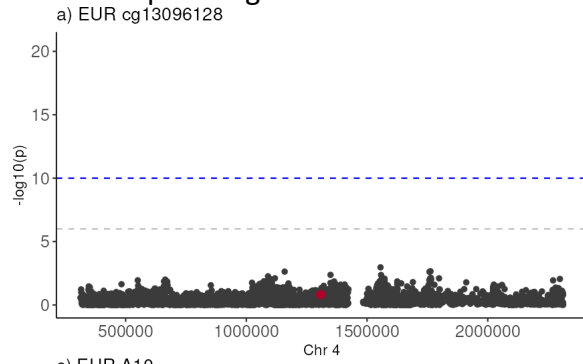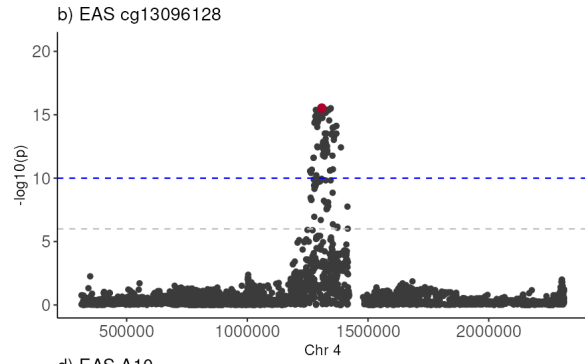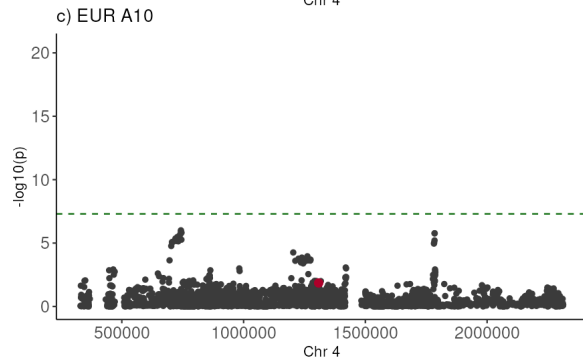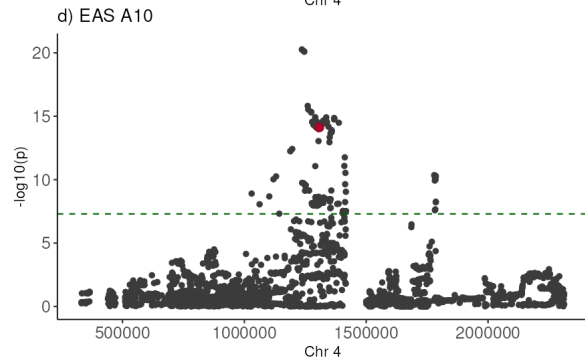

### Trait AD: probe cg09621958

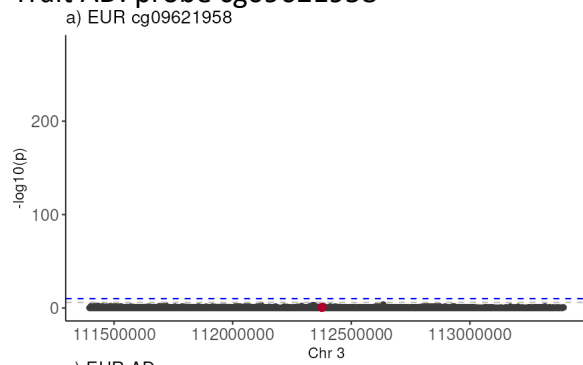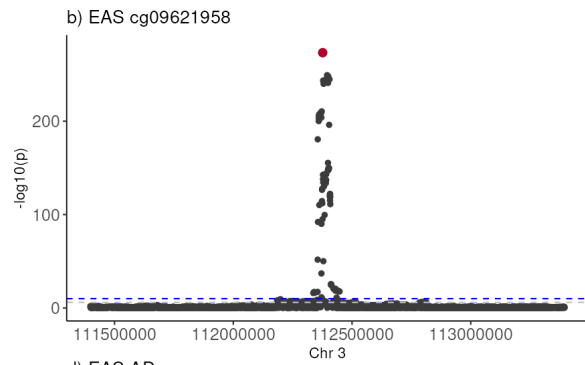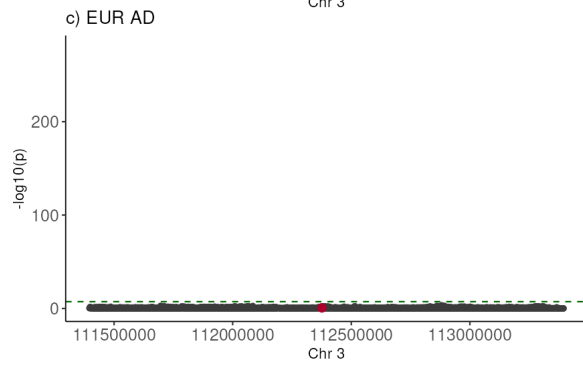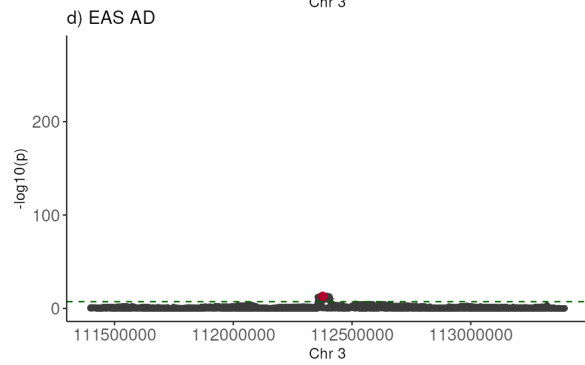

### Trait AD: probe cg16799191

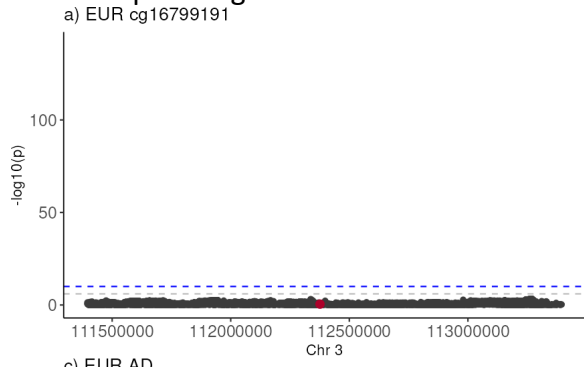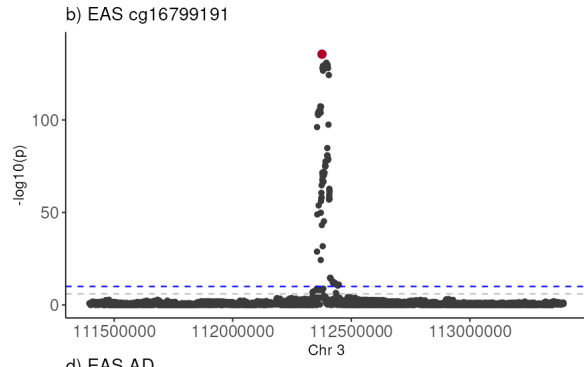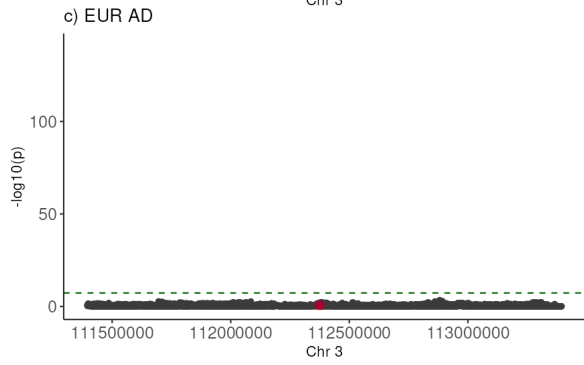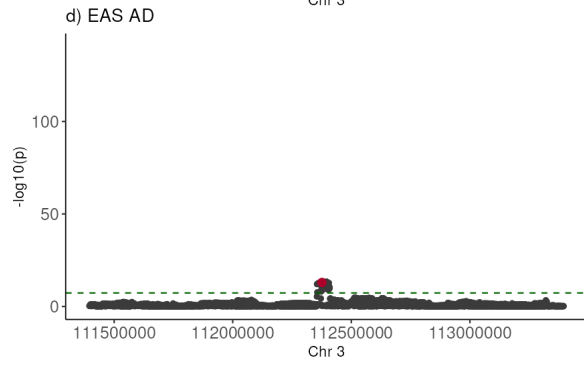

### Trait B01A: probe cg20327444

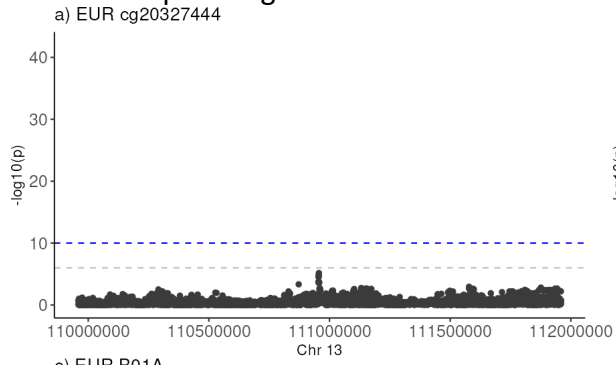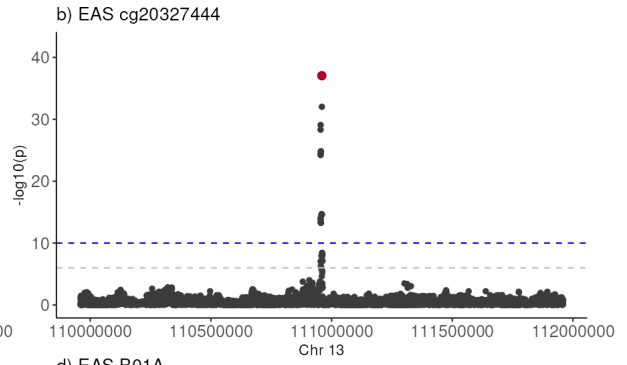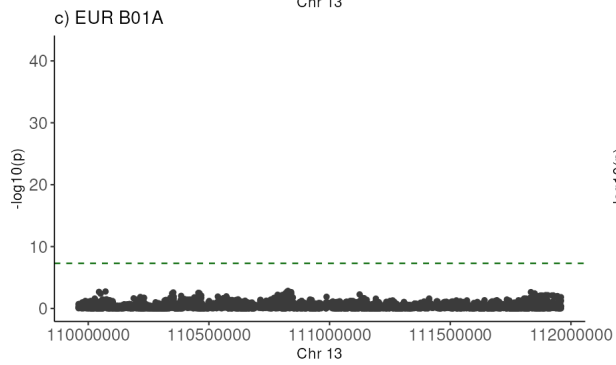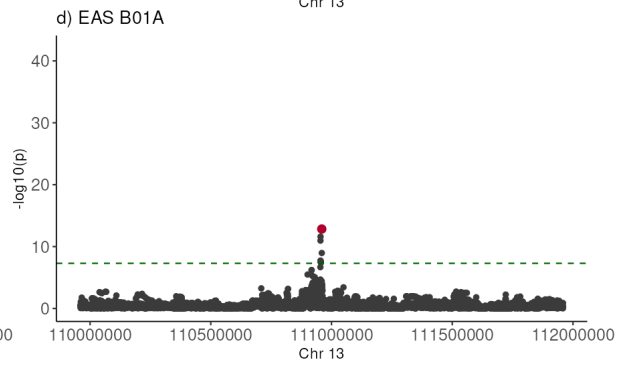

### Trait BMI: probe cg06801483

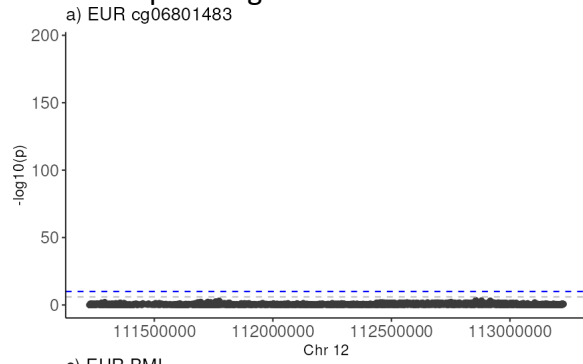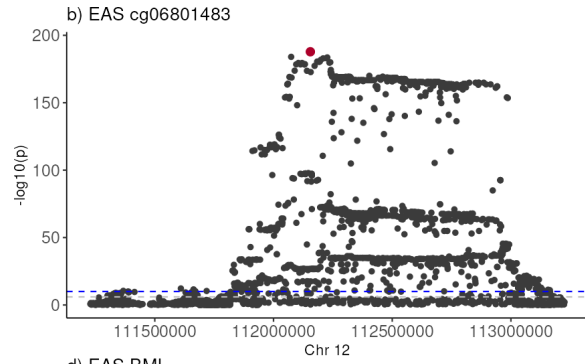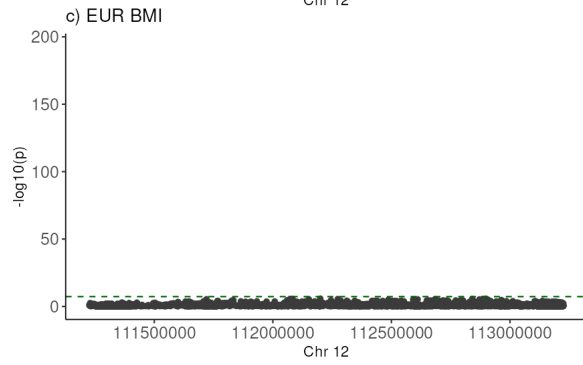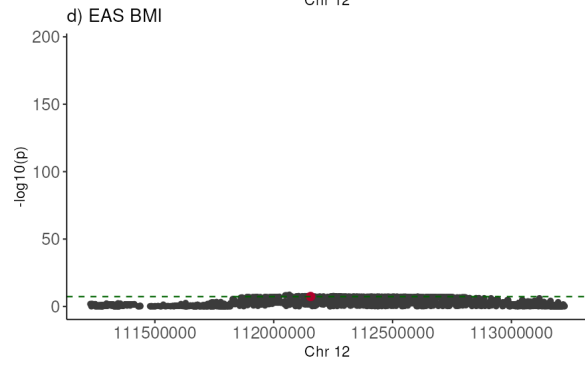

### Trait C07: probe cg02525926

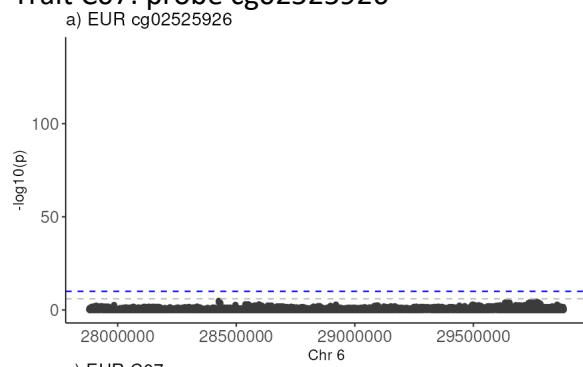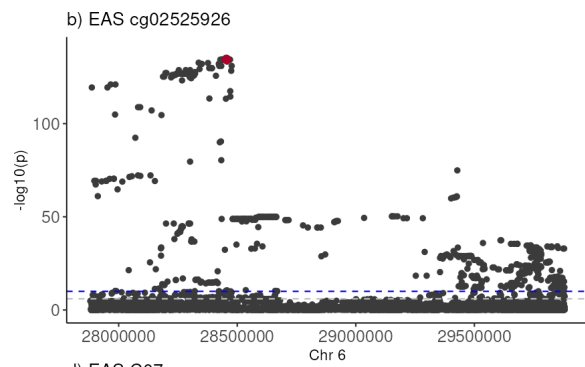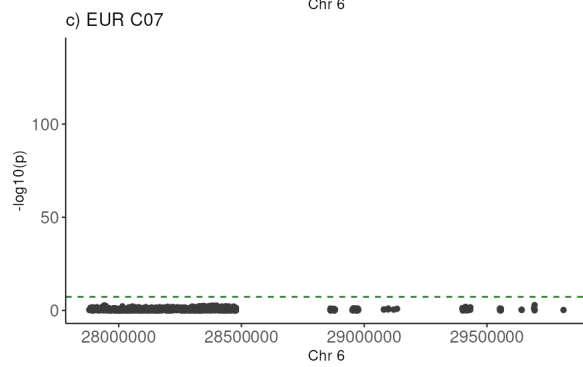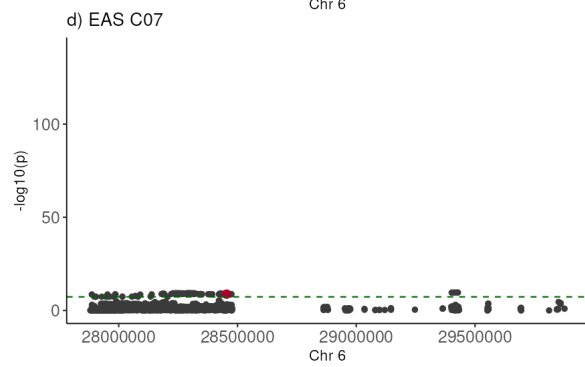

**Trait C09: probe cg02525926**

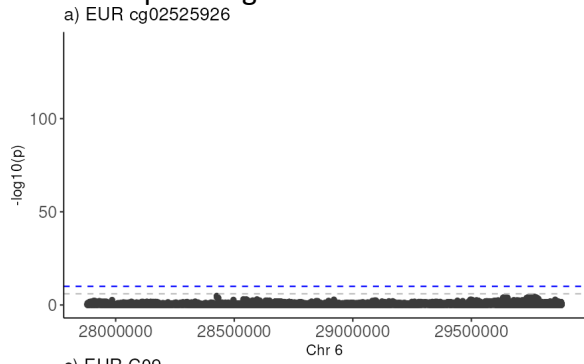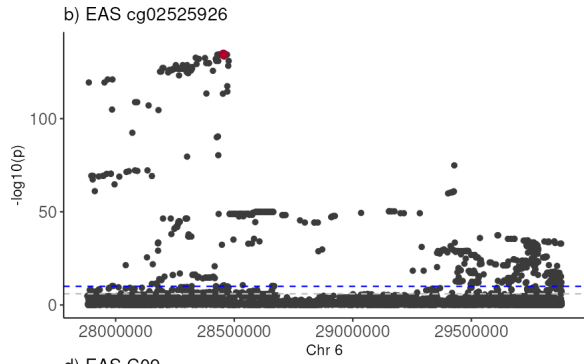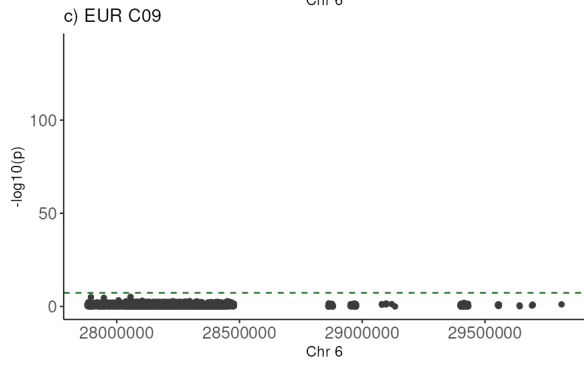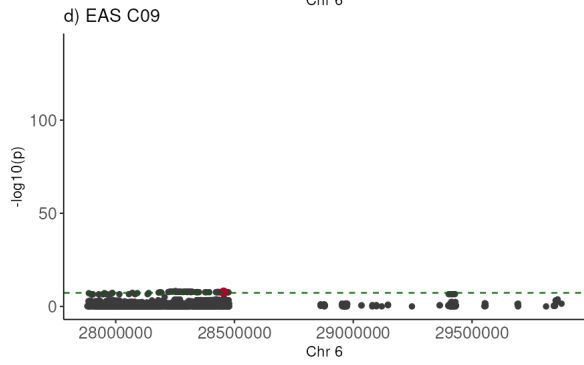

**Trait GGT: probe cg06853455**

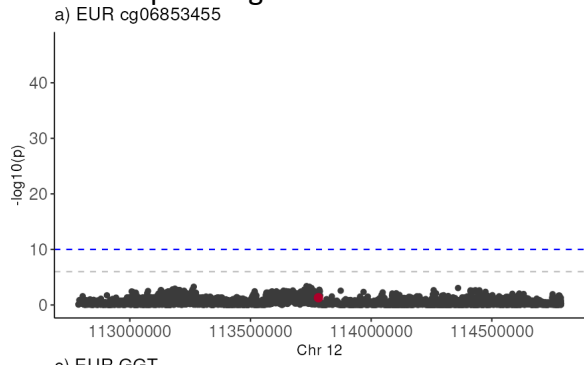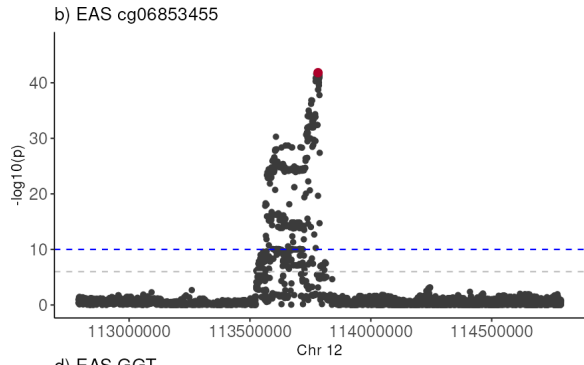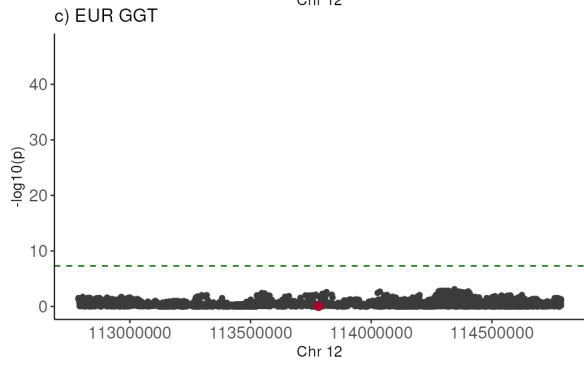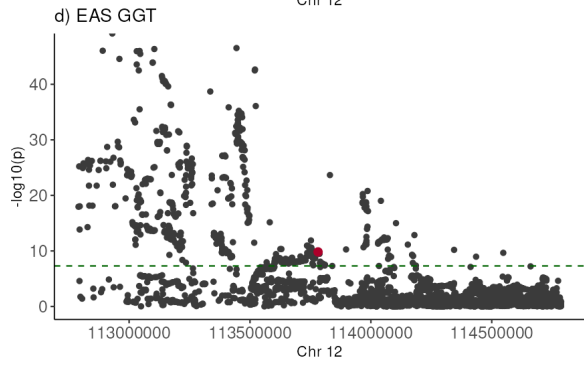

### Trait IS: probe cg20327444

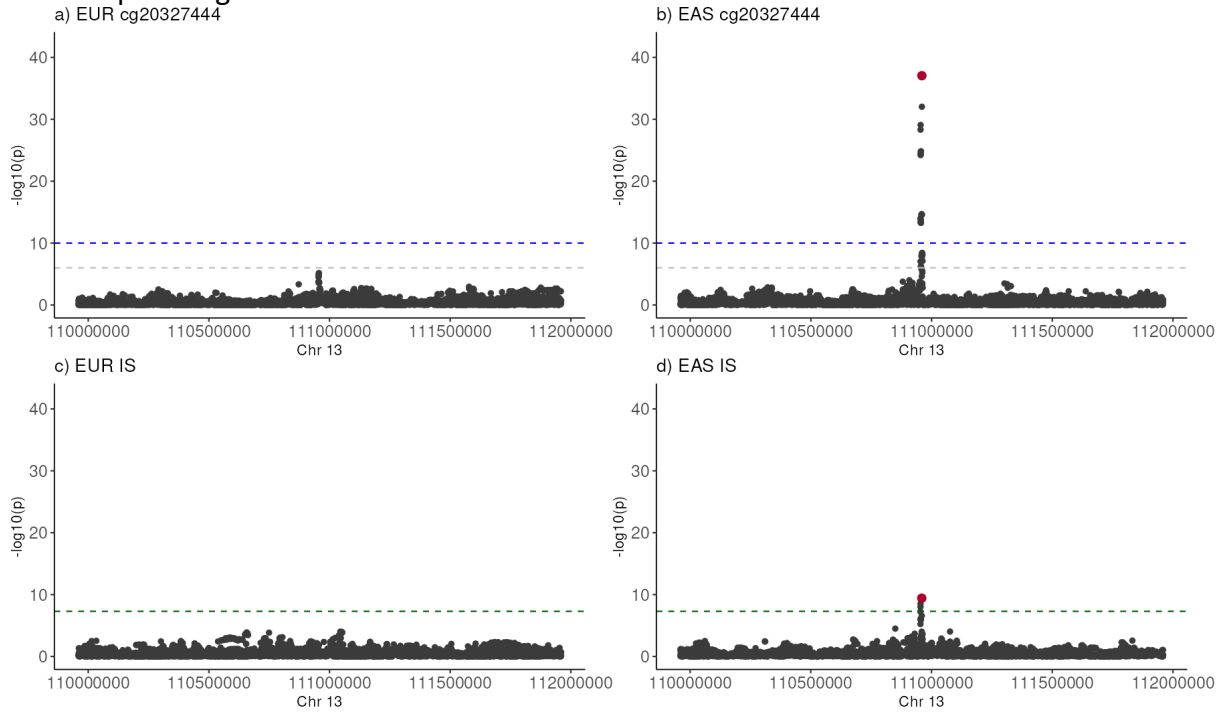

### Trait N02BA: probe cg20327444

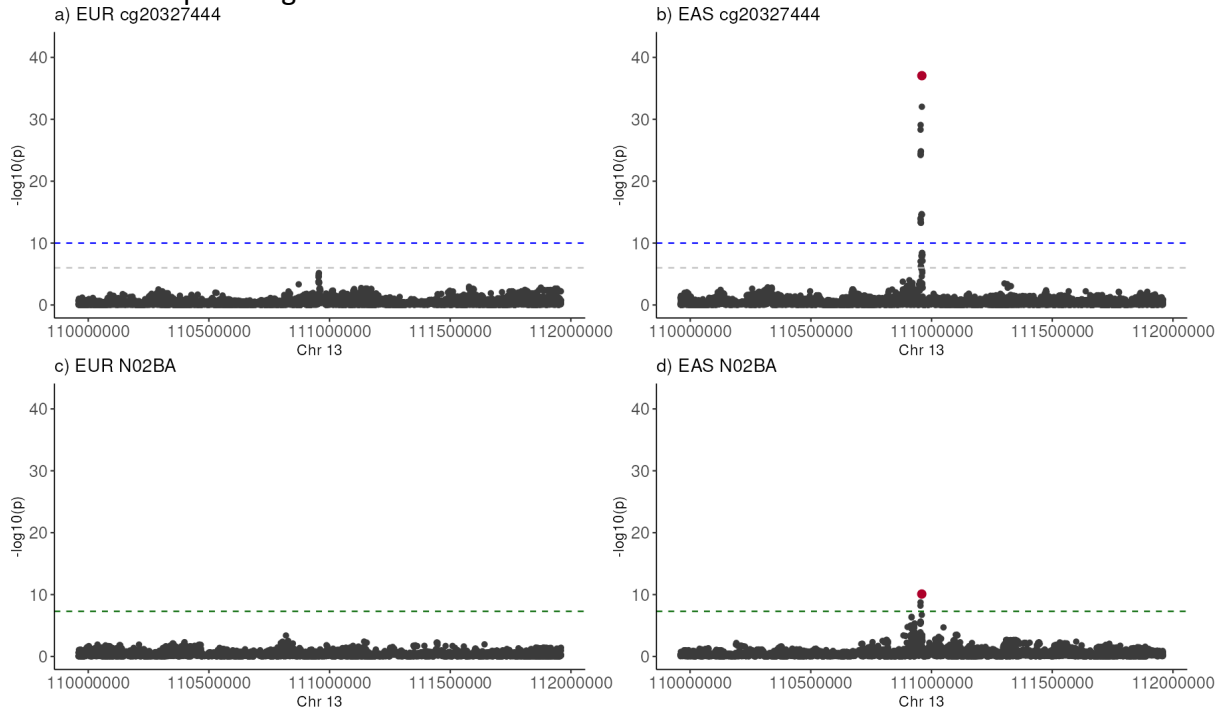

### Trait RBC: probe cg22683016

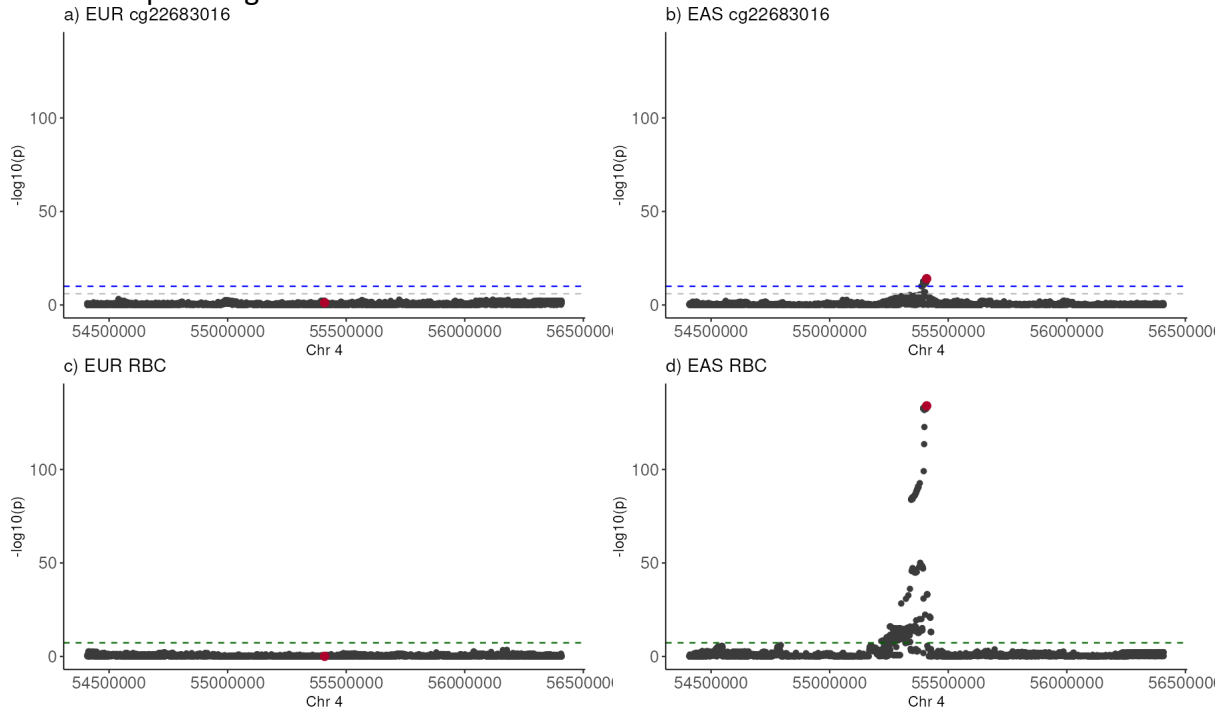

### Trait RBC: probe cg18700744

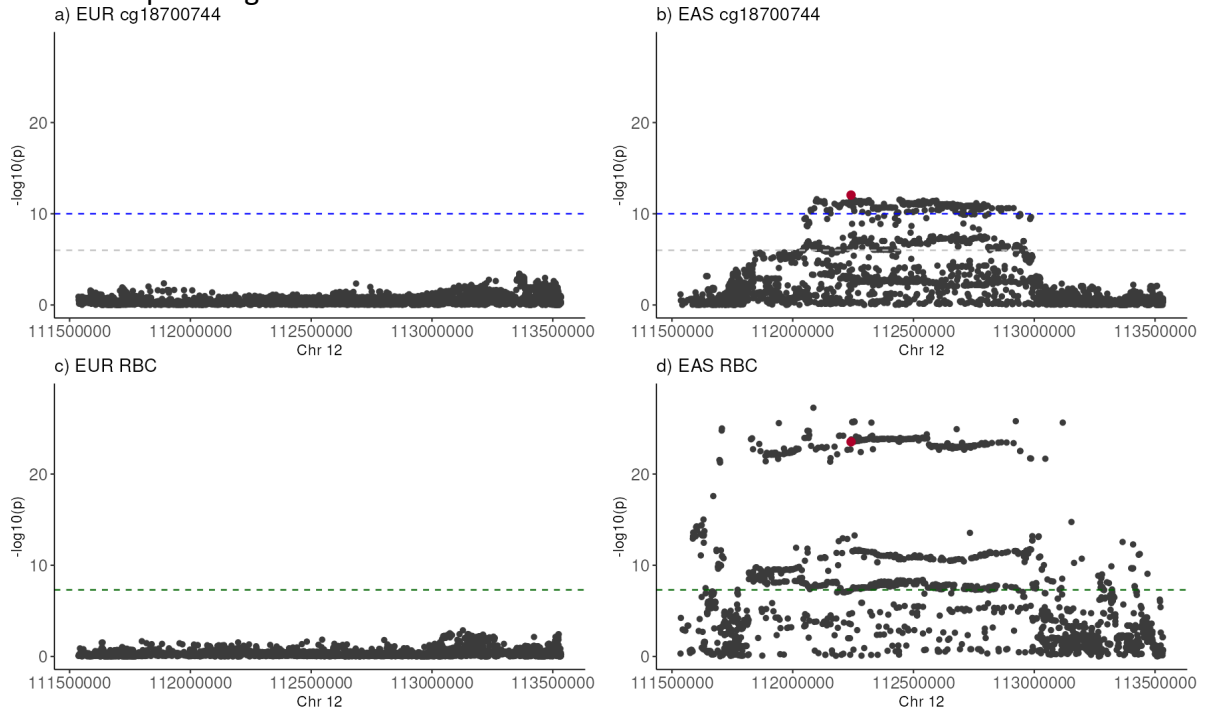



### Trait SAP: probe cg24148767

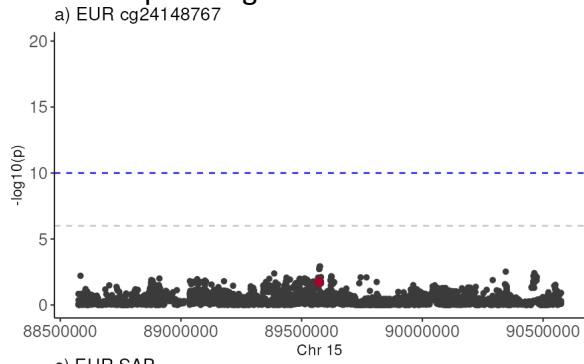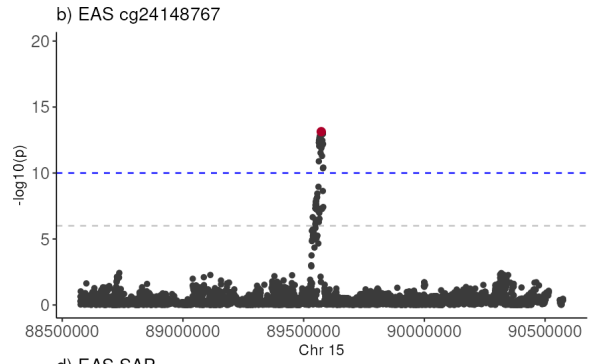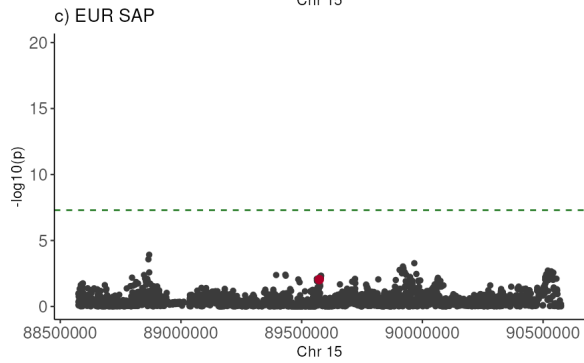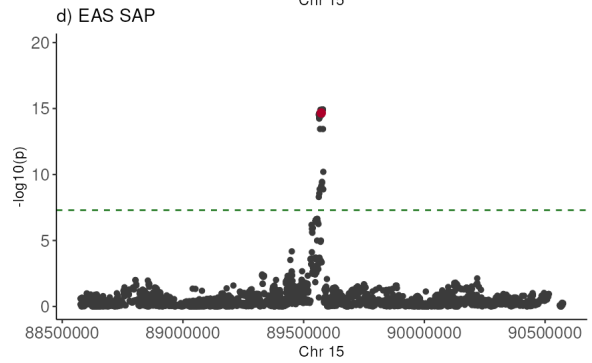

### Trait T2D: probe cg13096128

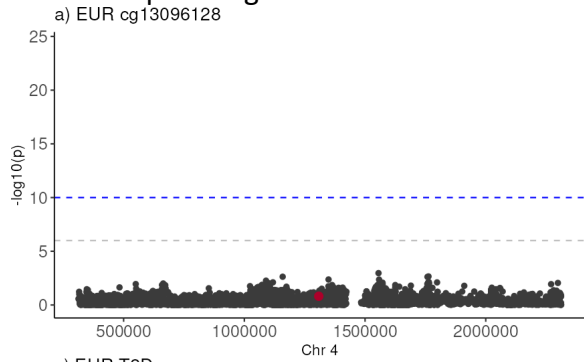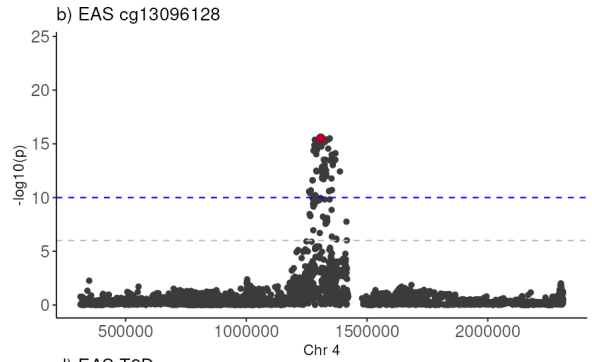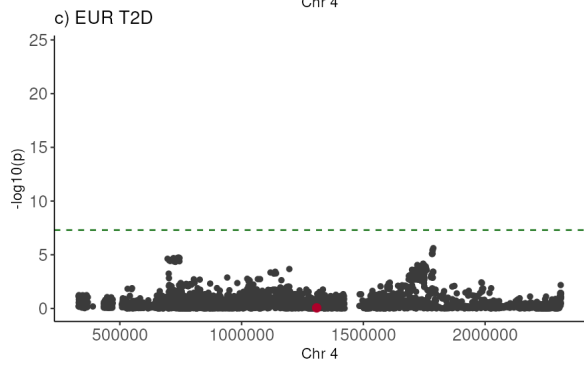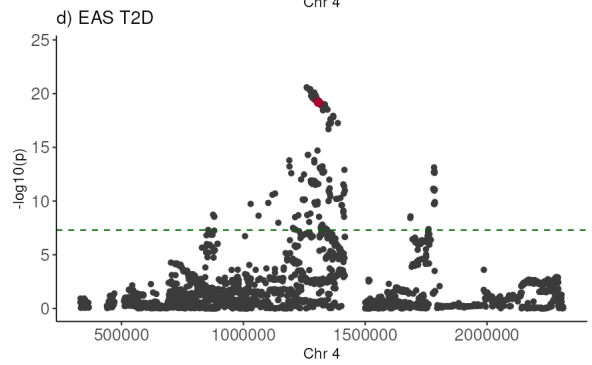

### Trait T2D: probe cg04847110

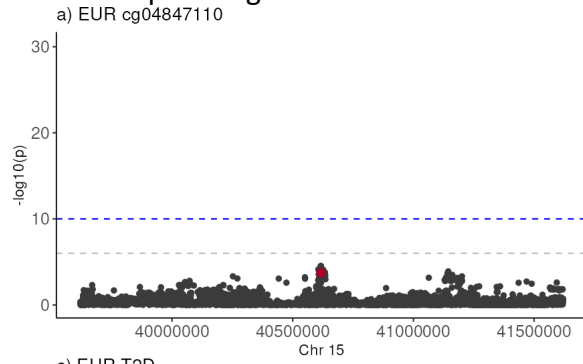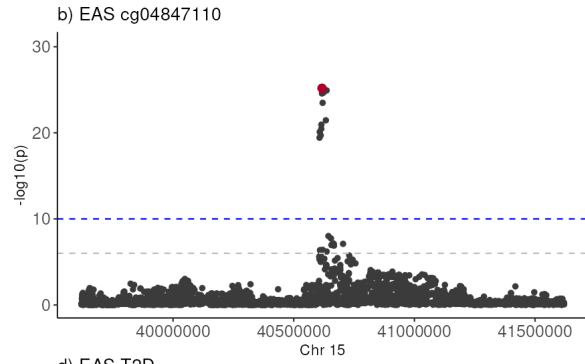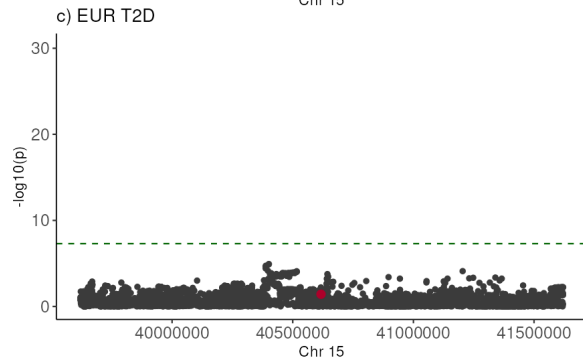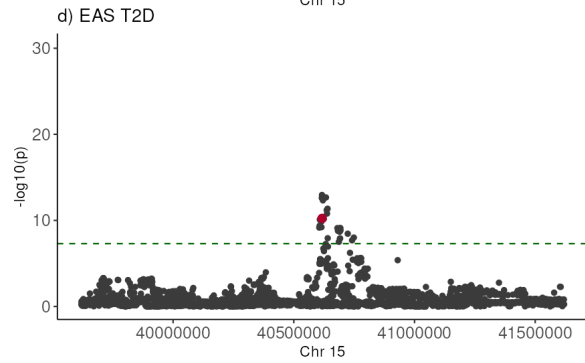

### Trait WBC: probe cg13474750

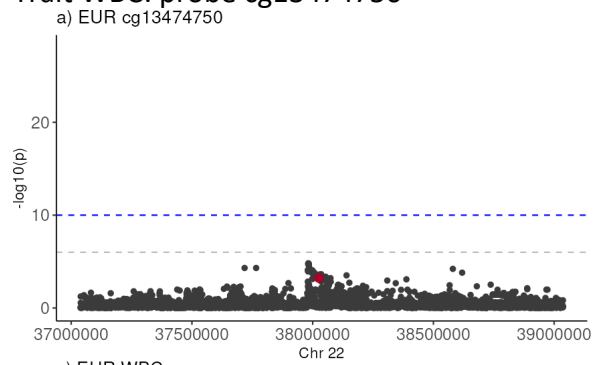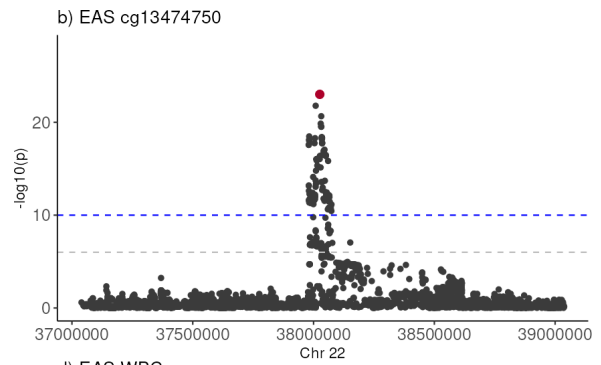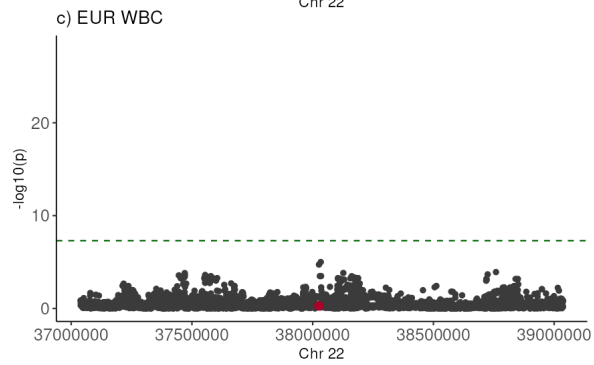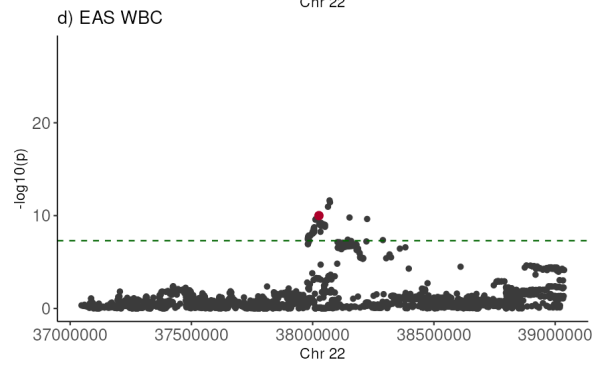

### Trait ALP: probe cg16958793

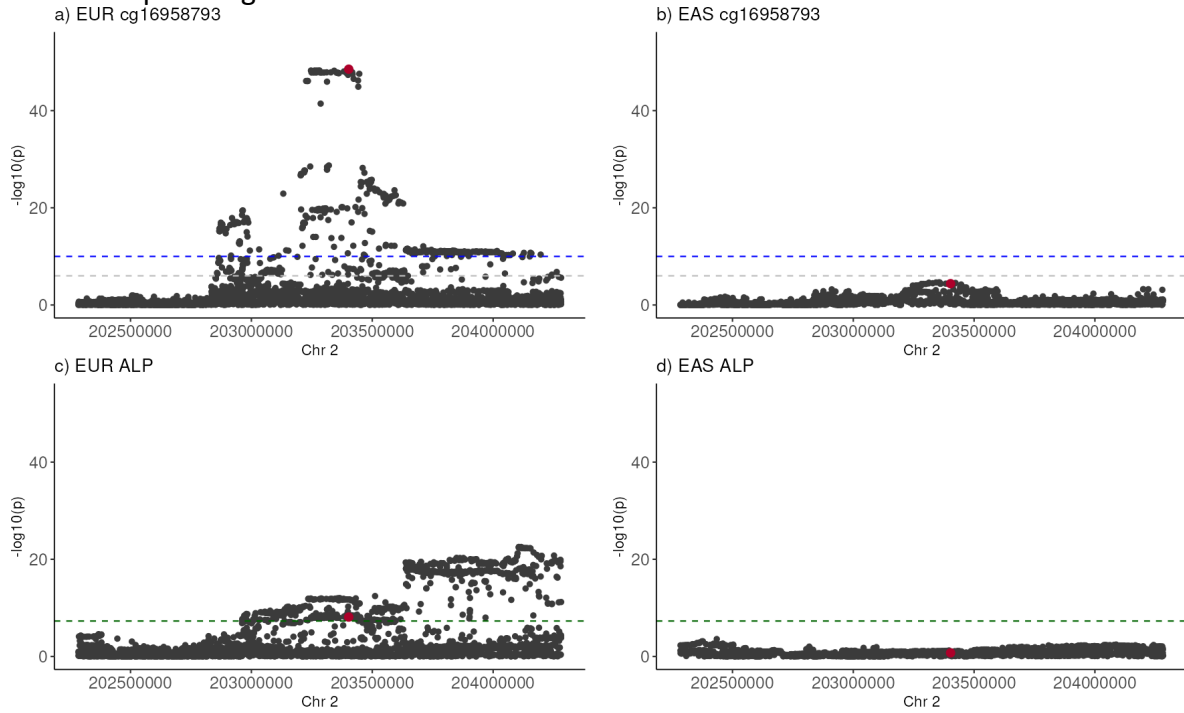

### Trait ALP: probe cg09642020

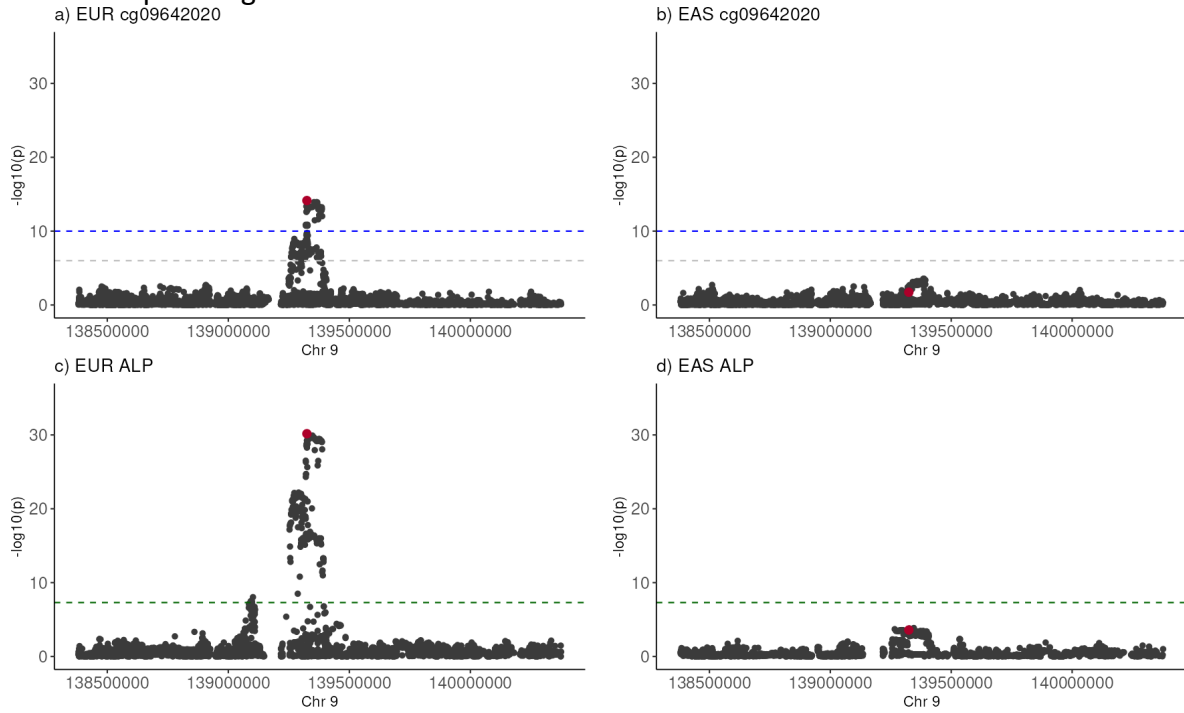

Trait ALP: probe cg13879547

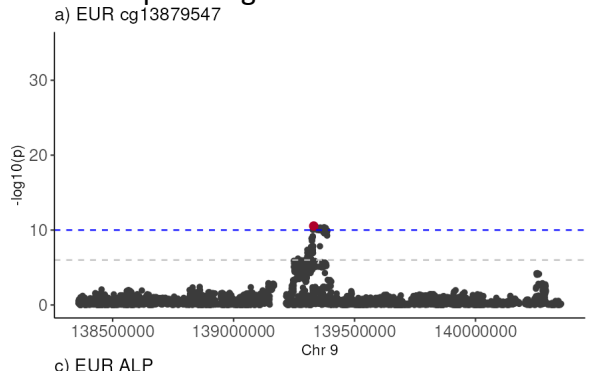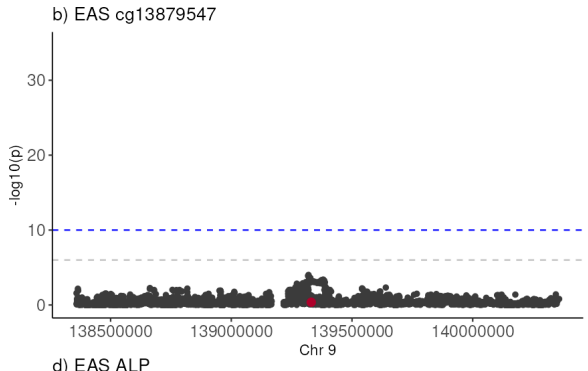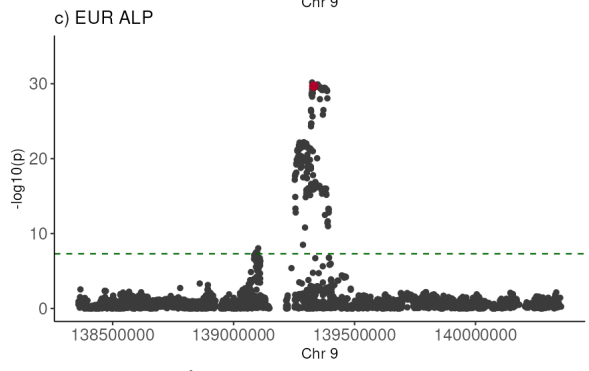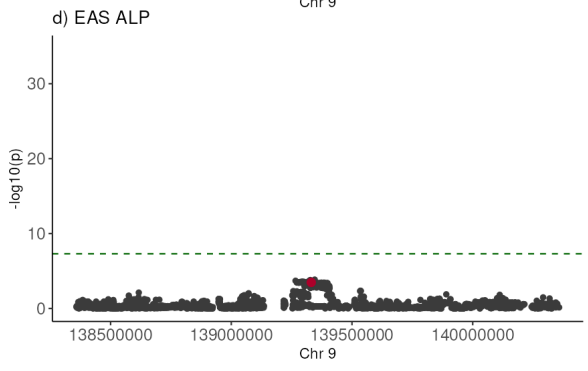

Trait ALP: probe cg02991085

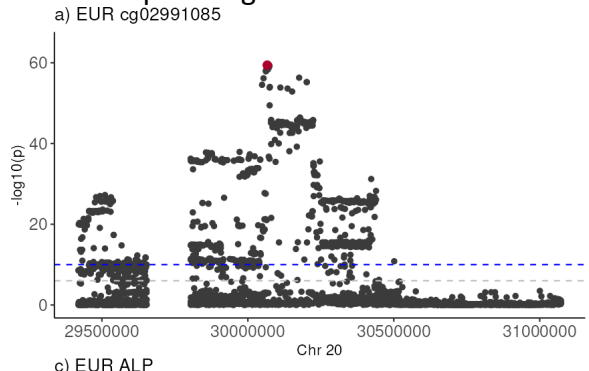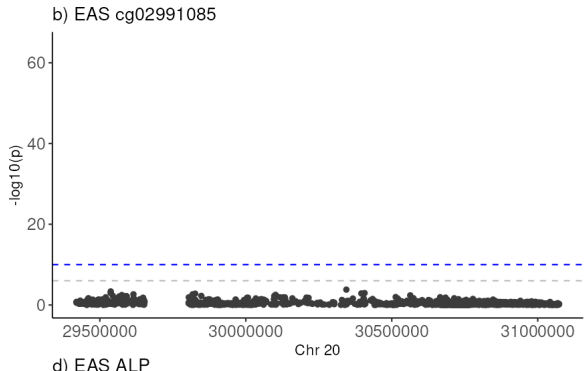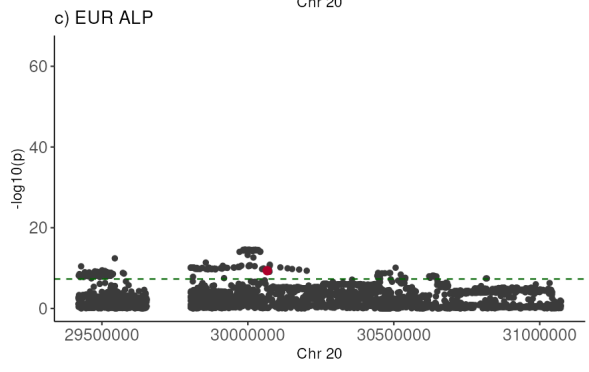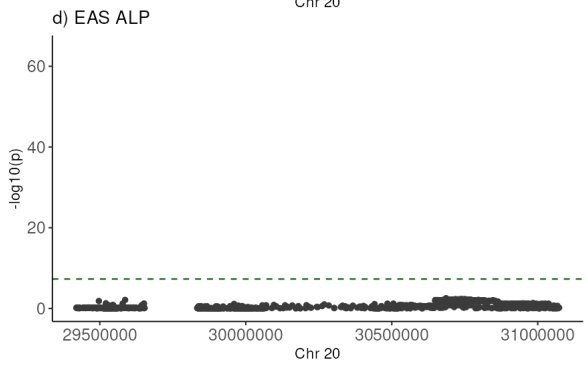

Trait ALP: probe cg13159946

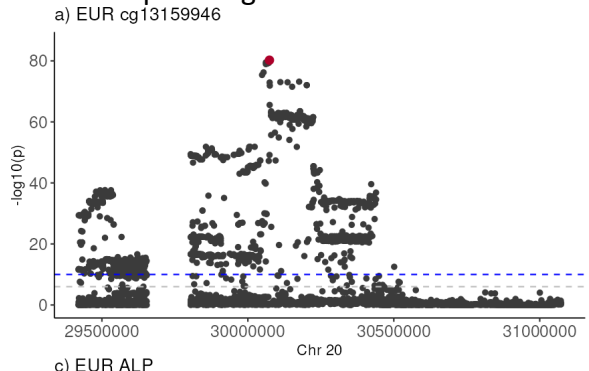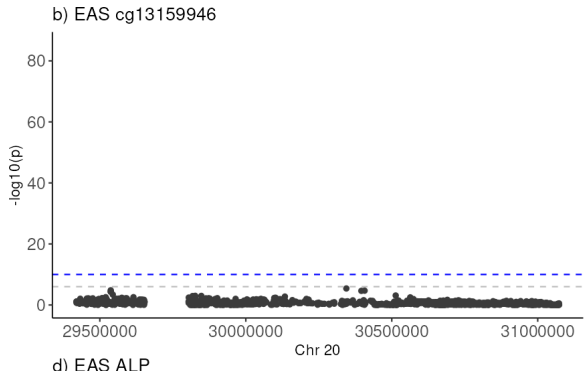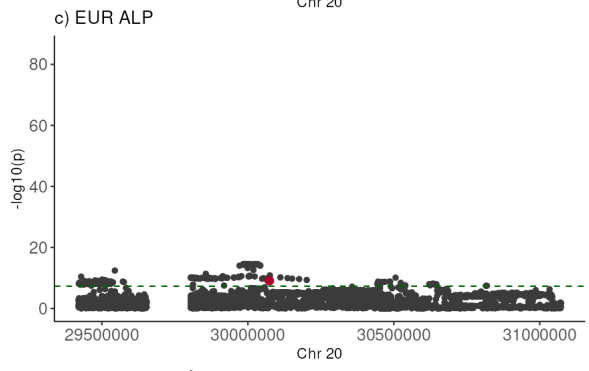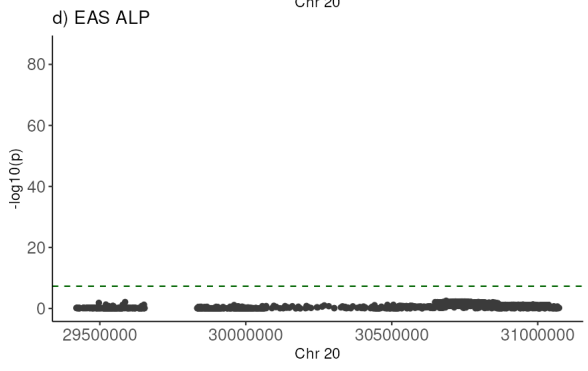

Trait ALP: probe cg25502144

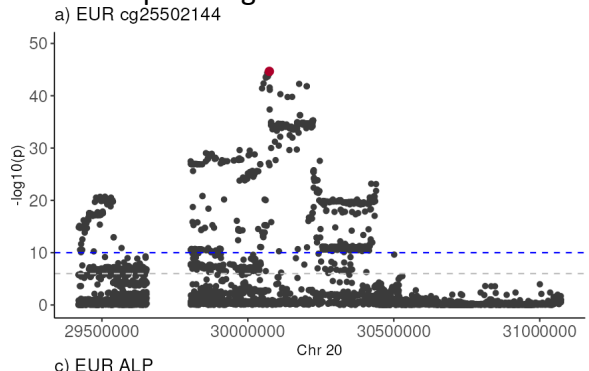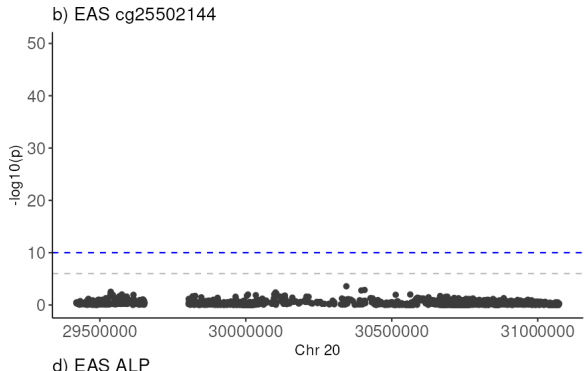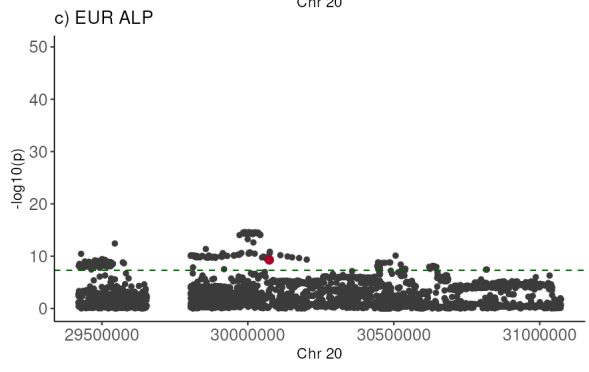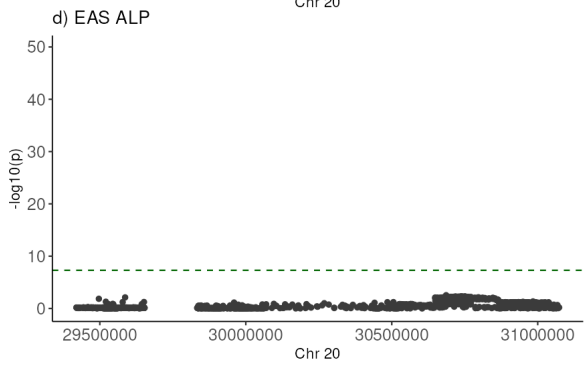

### Trait ALT: probe cg05914712

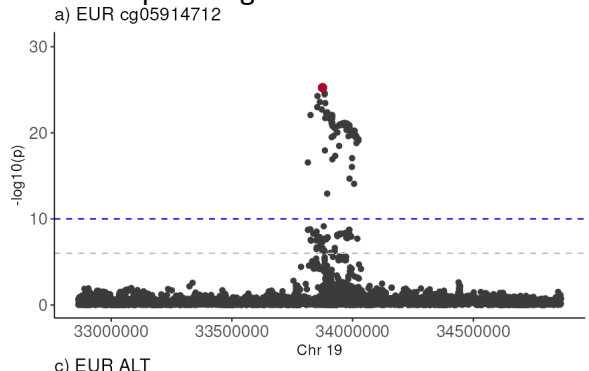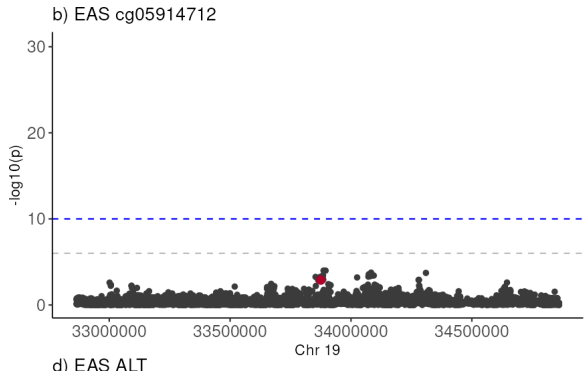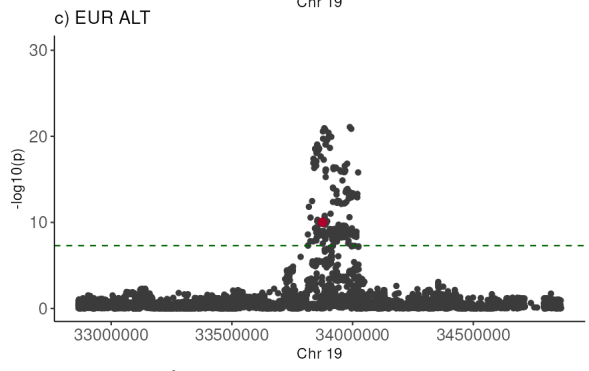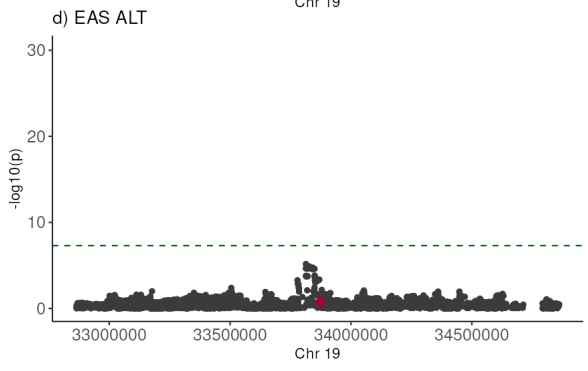

### Trait As: probe cg18318560

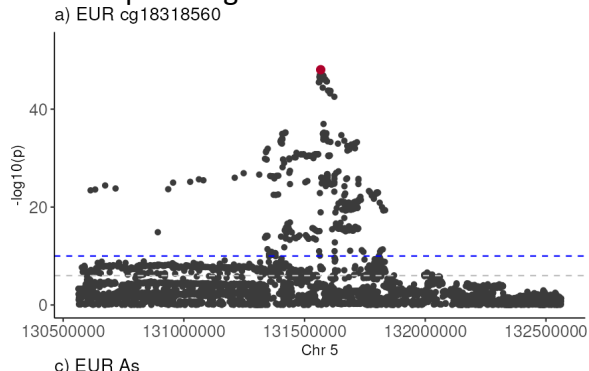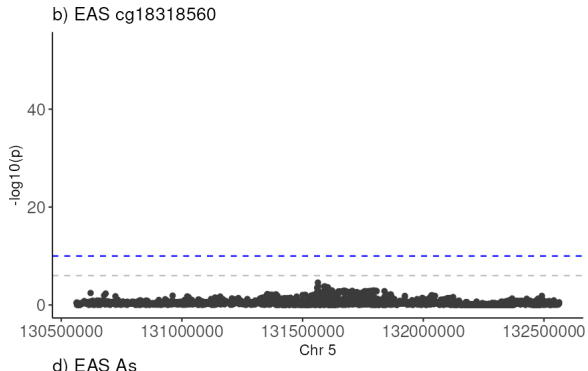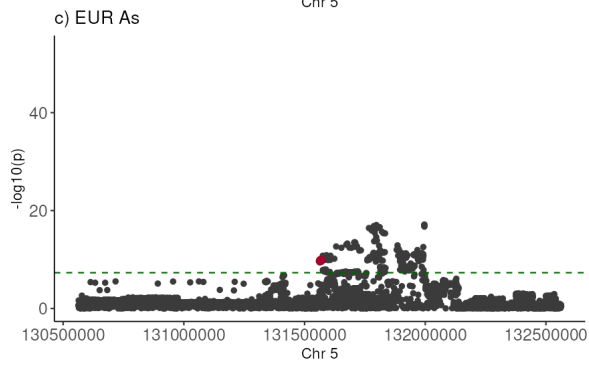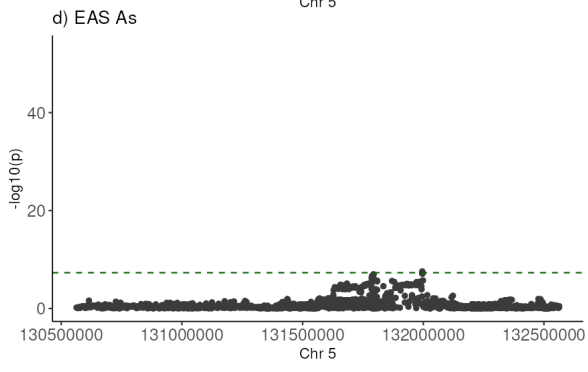

### Trait As: probe cg24032190

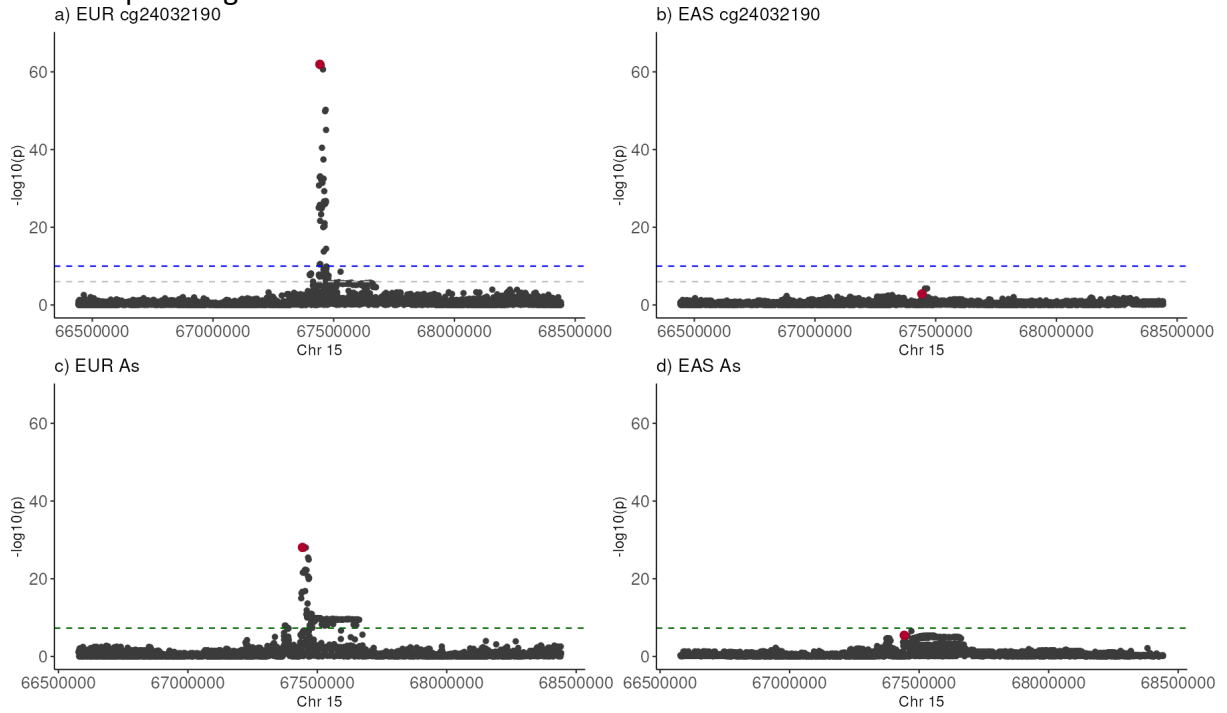

### Trait AST: probe cg17642041

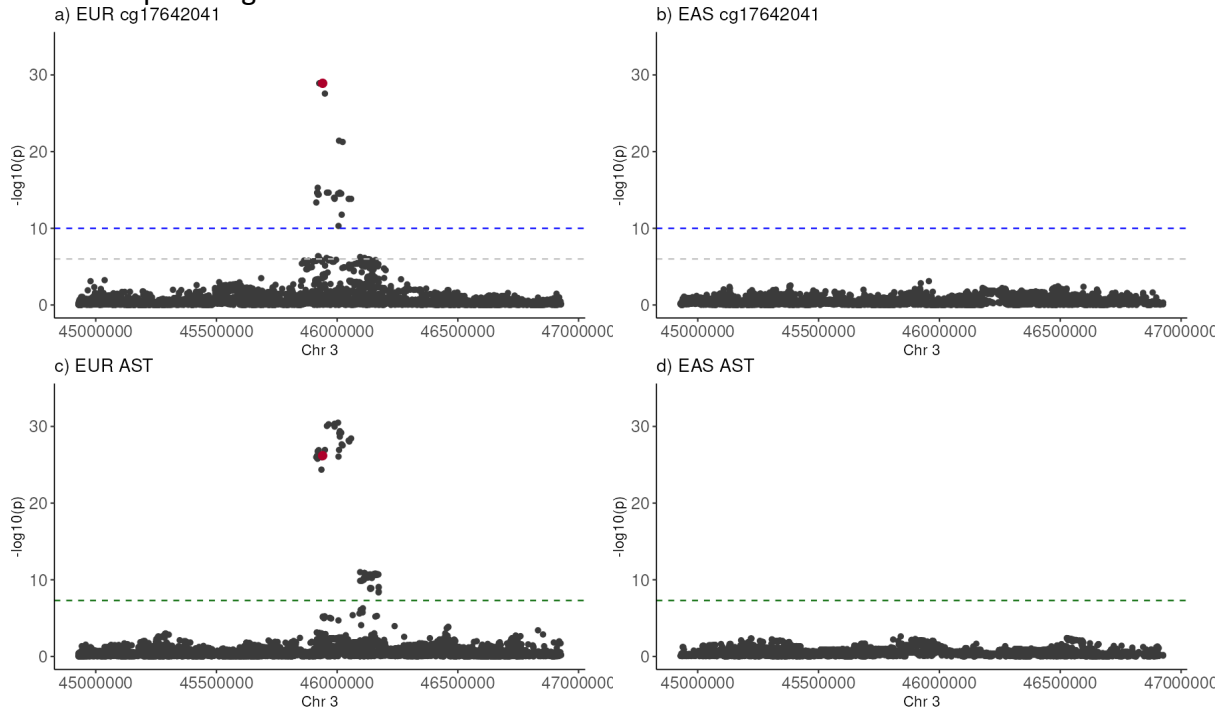

### Trait AST: probe cg22022041

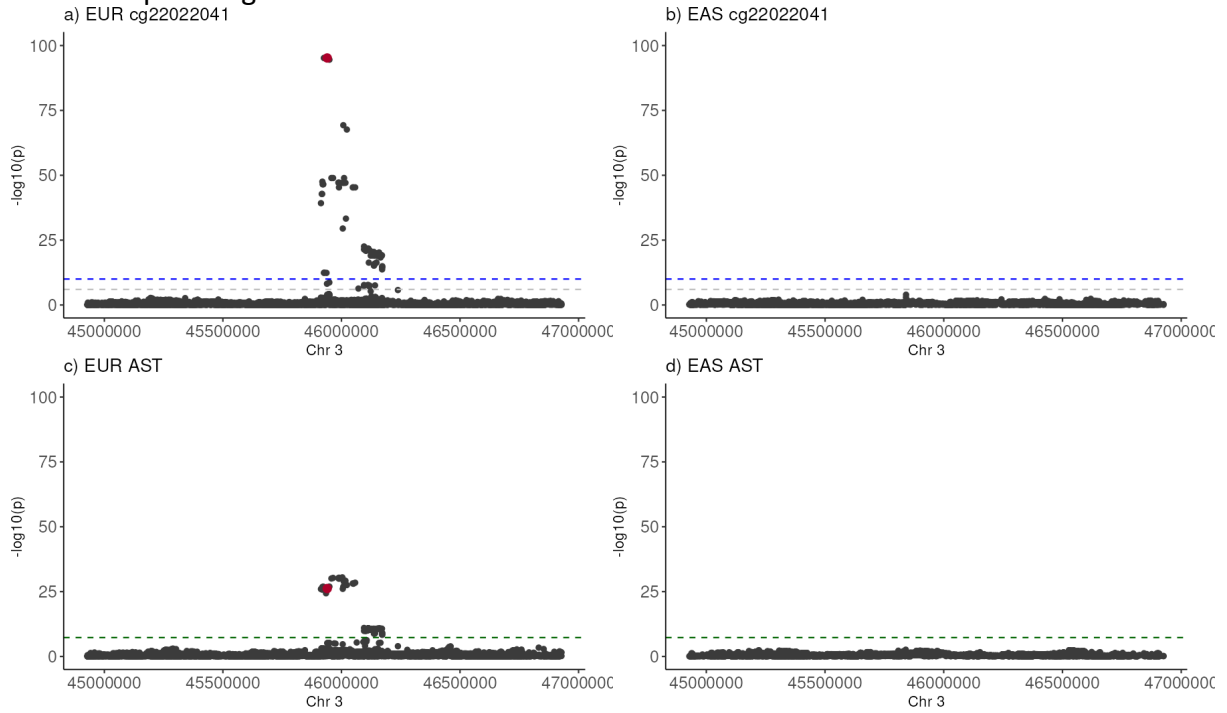

### Trait AST: probe cg15742123

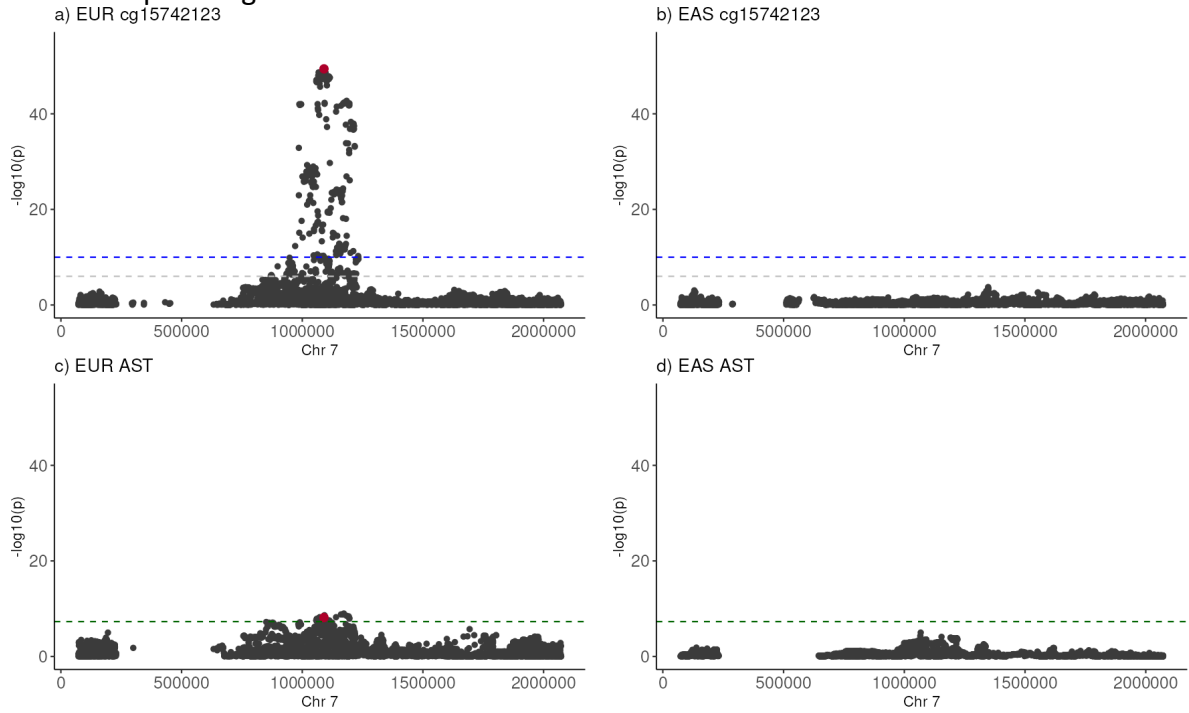



Trait AST: probe cg21664854

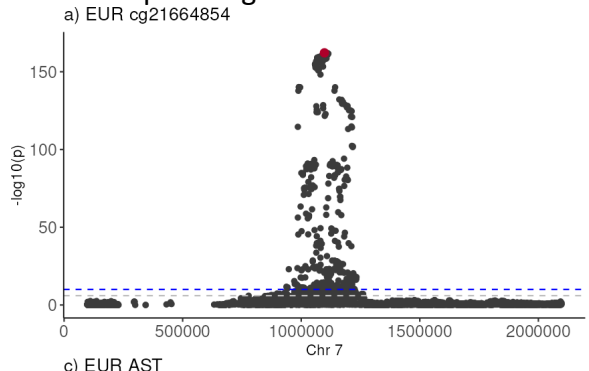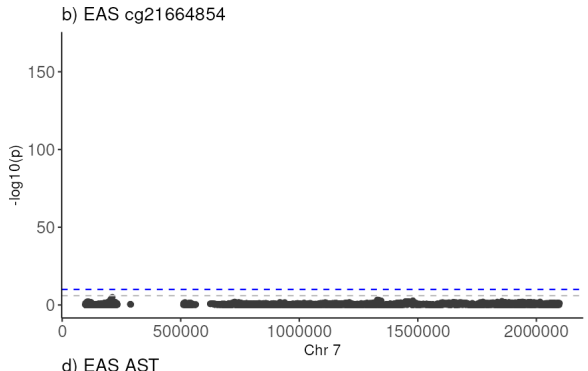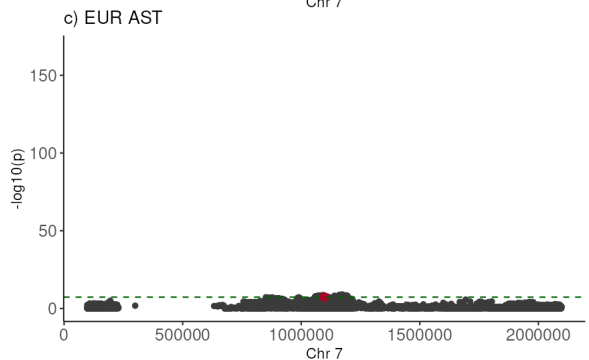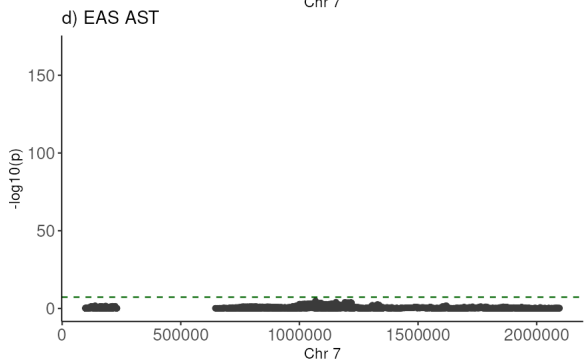

Trait AST: probe cg25863070

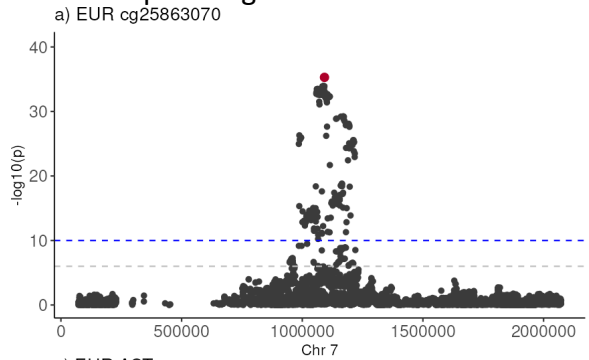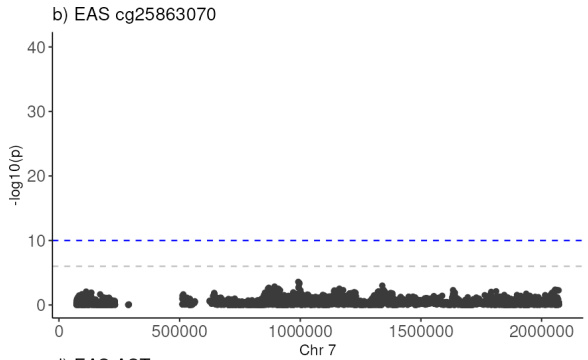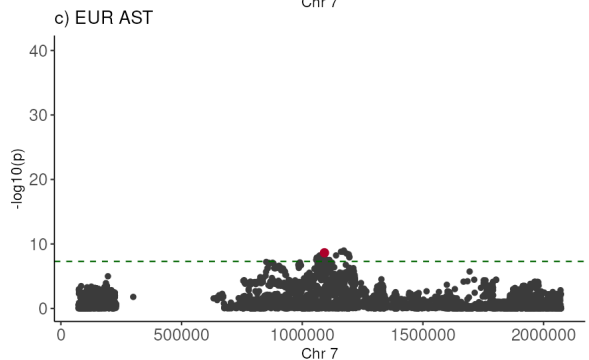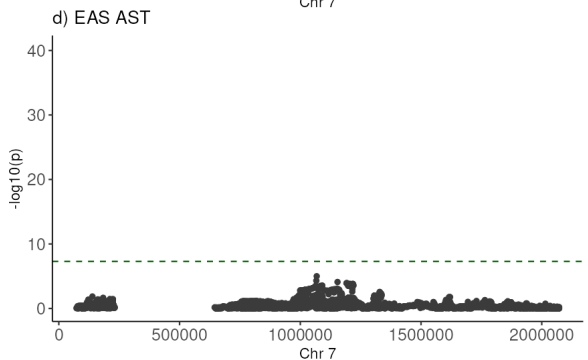

Trait AST: probe cg03058187

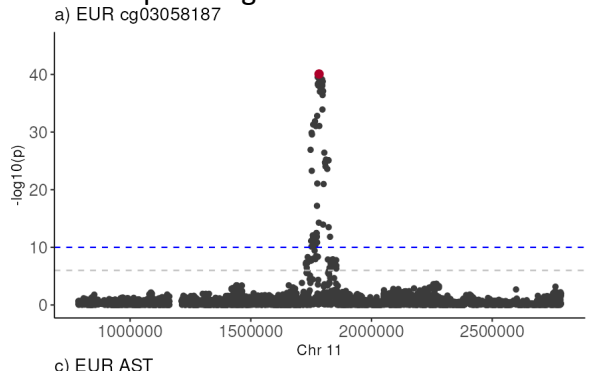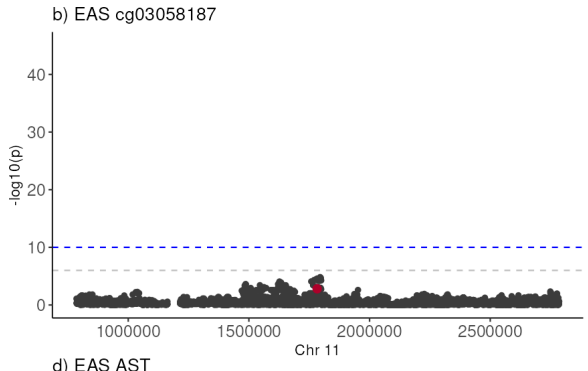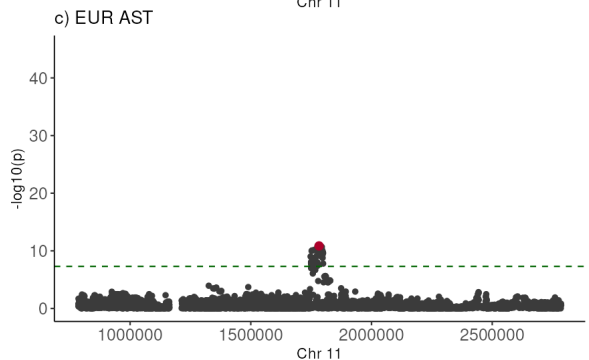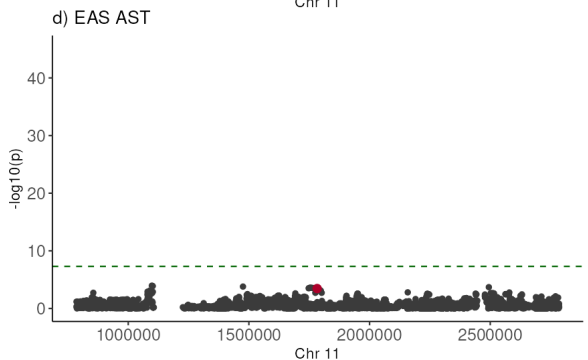

Trait AST: probe cg25044734

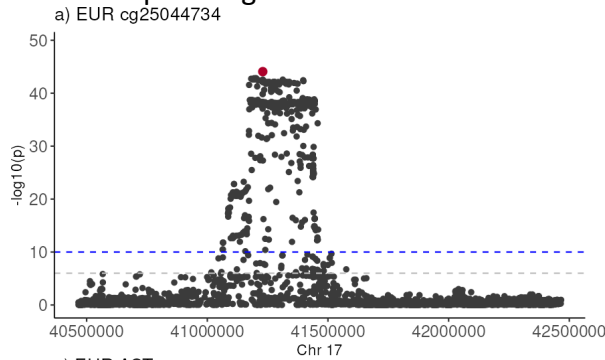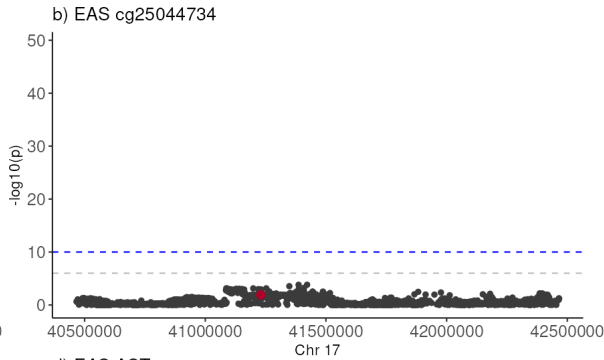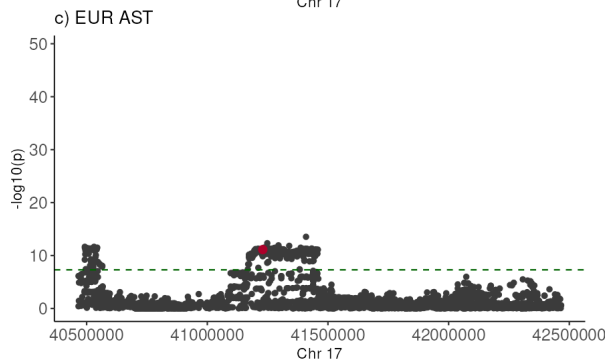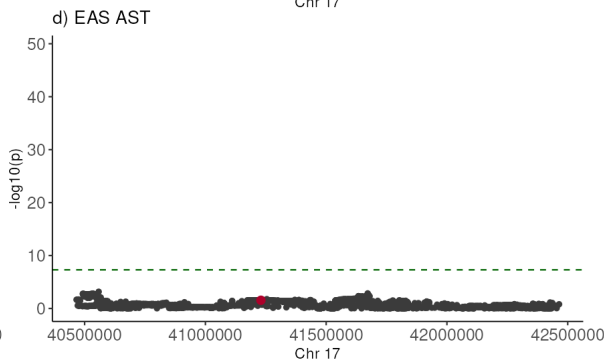

### Trait AST: probe cg09479818

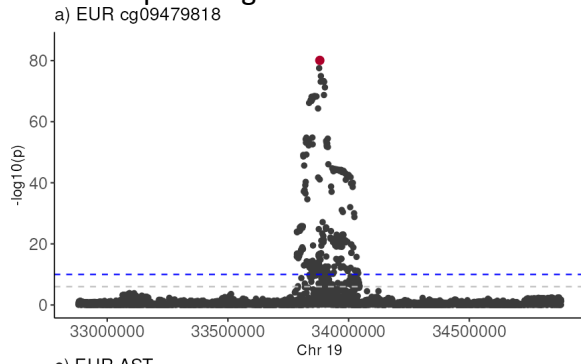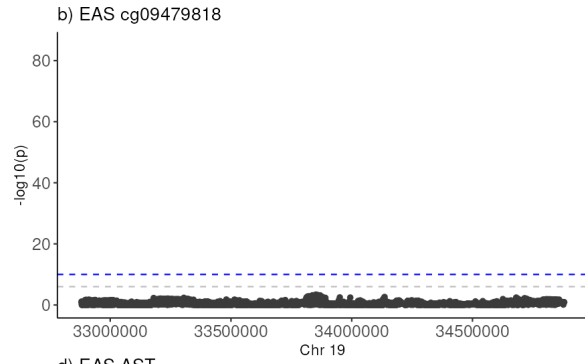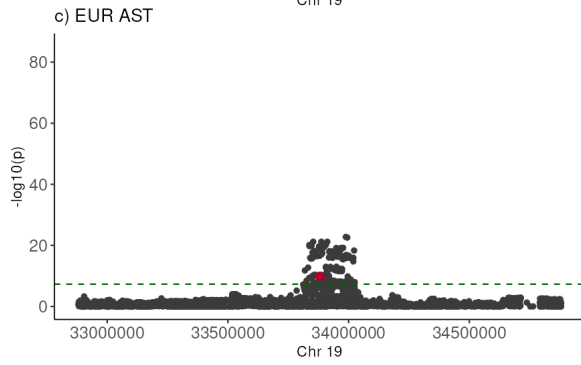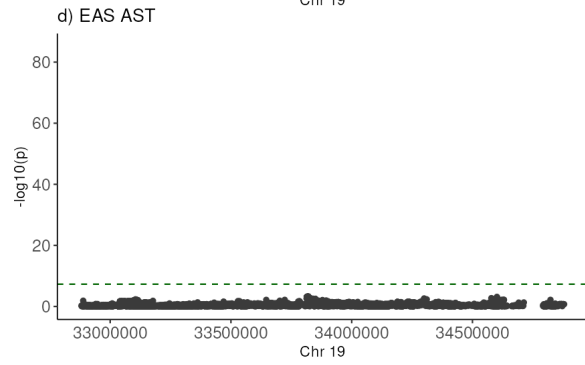

### Trait BC: probe cg10900703

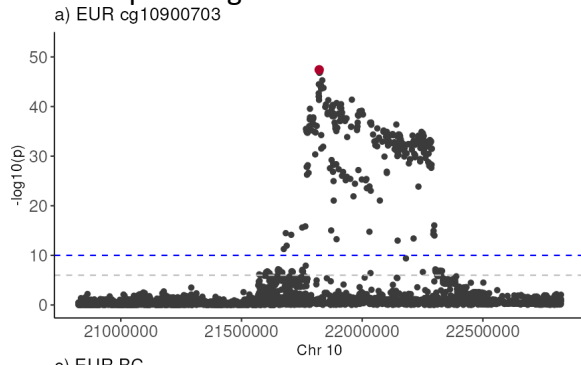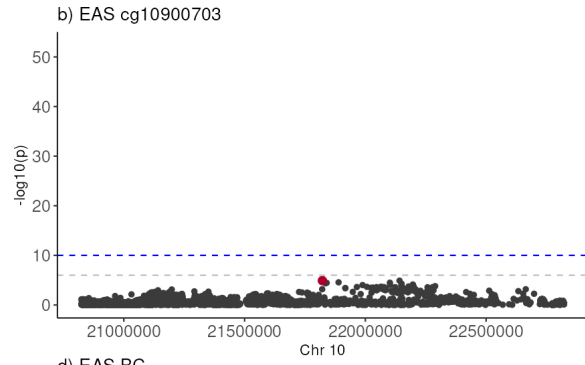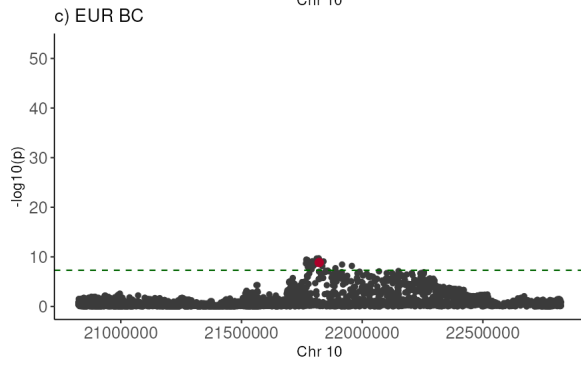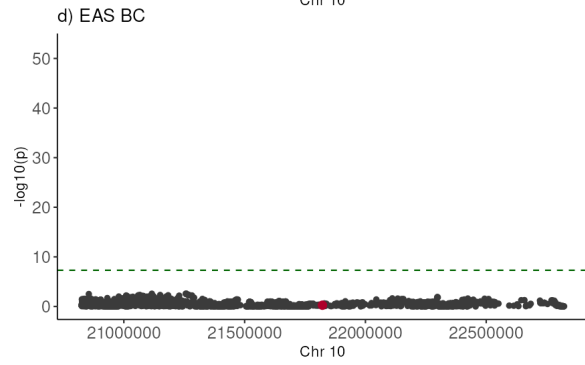

Trait BC: probe cg16440331

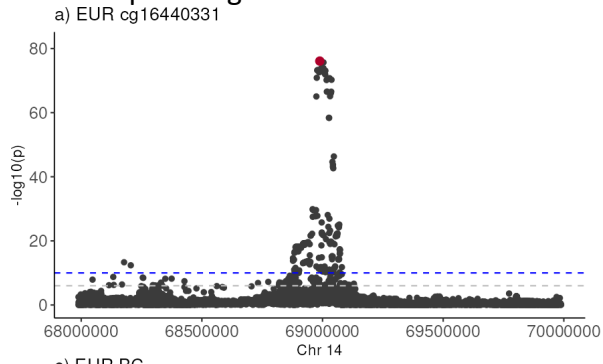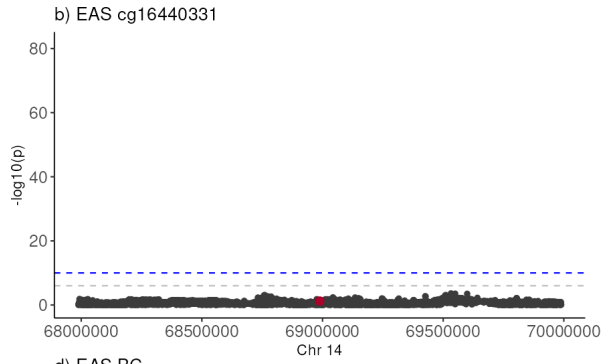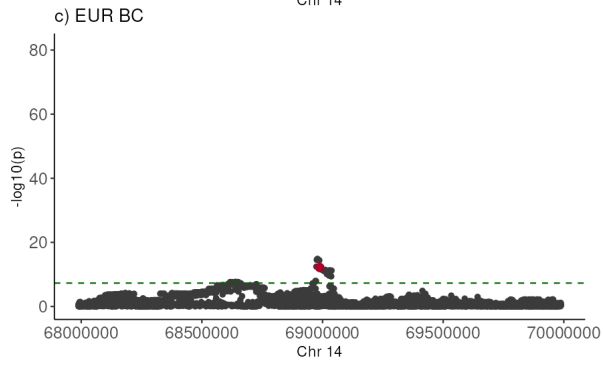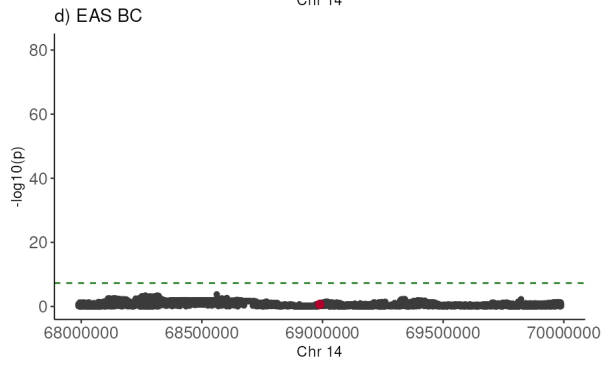

Trait BC: probe cg03733026

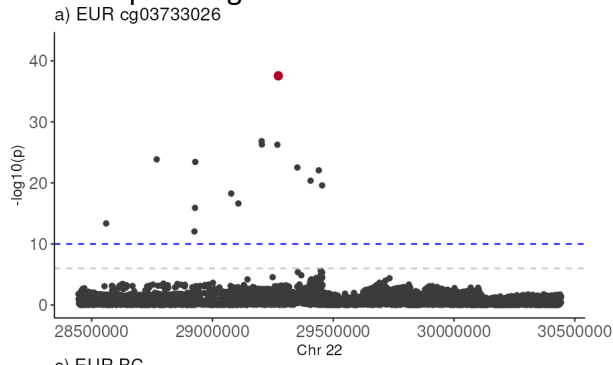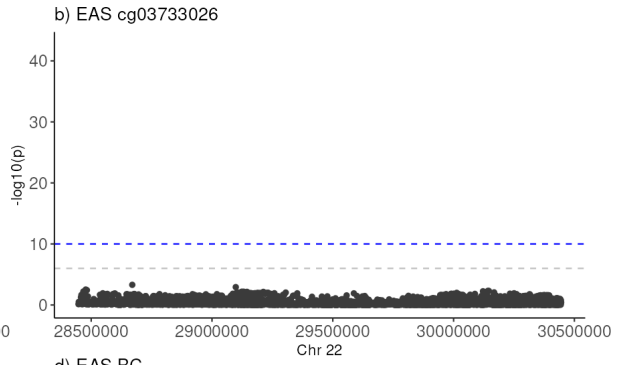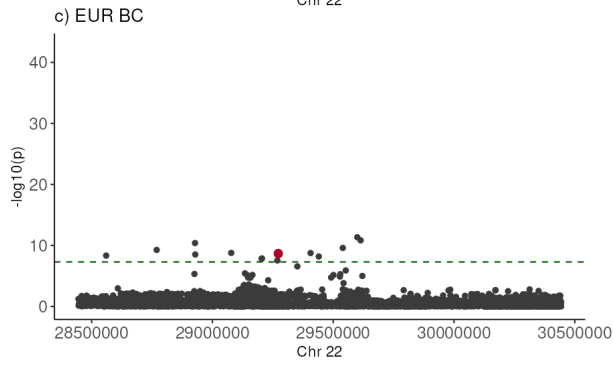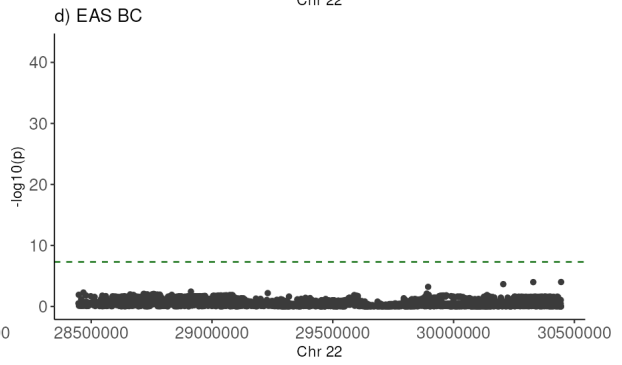

### Trait BMI: probe cg05790579

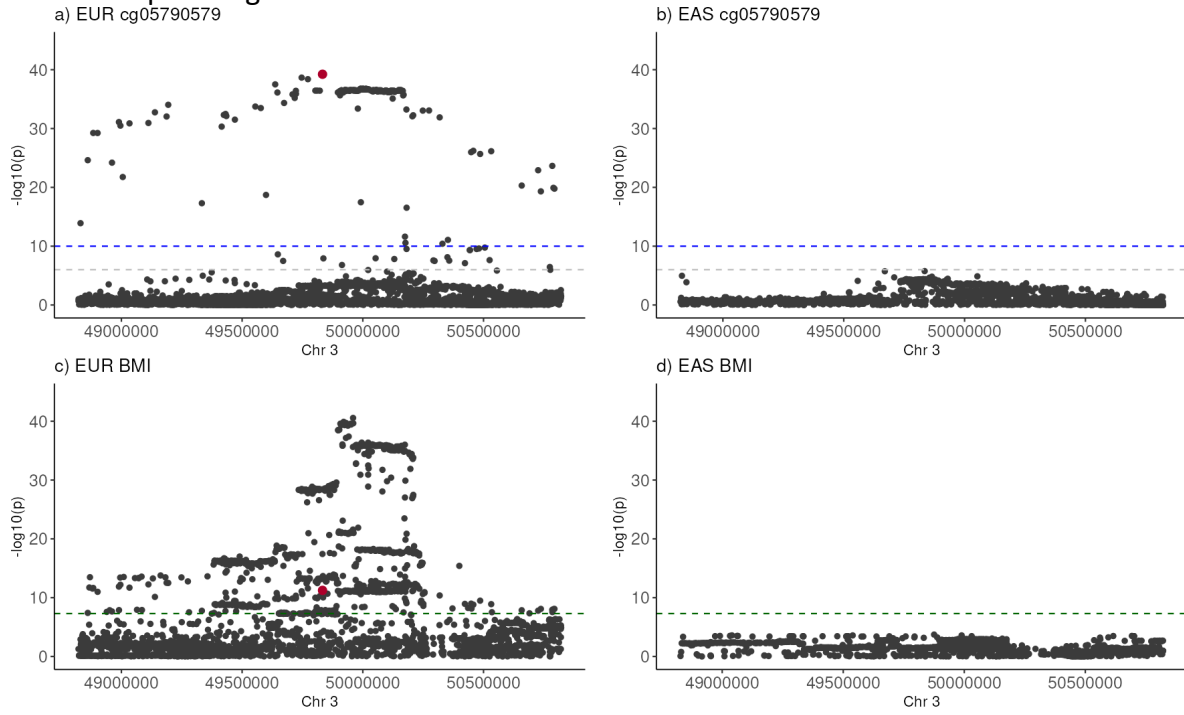

### Trait BUN: probe cg16413030

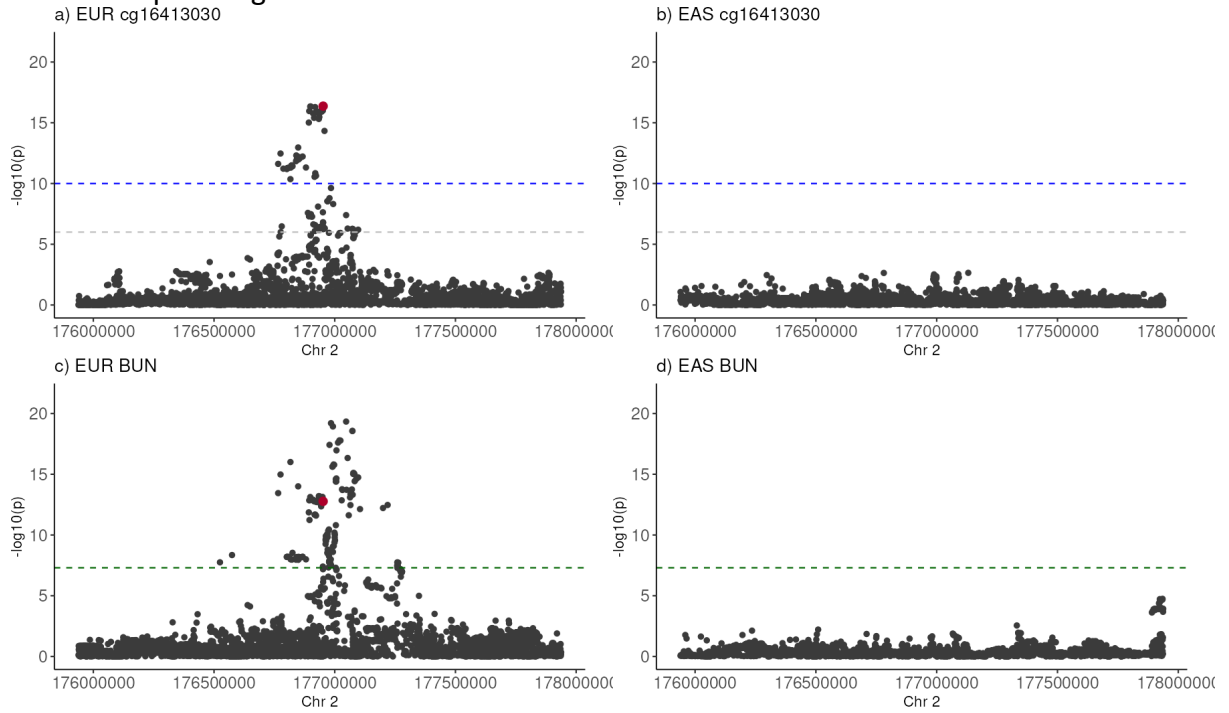

Trait BW: probe cg05845840

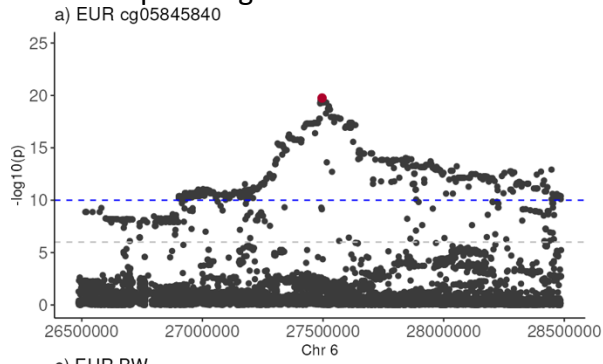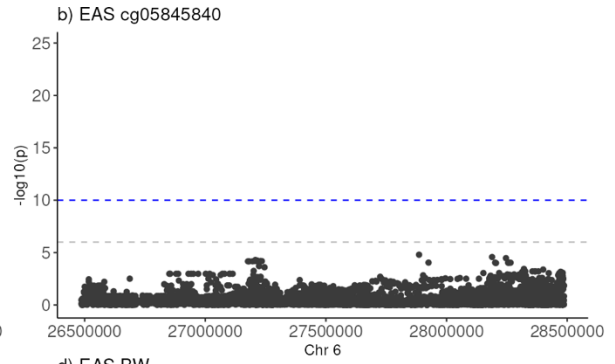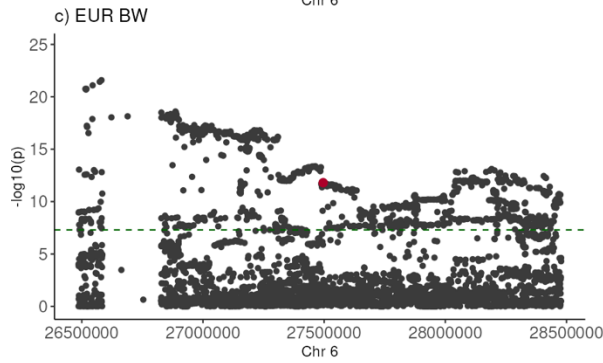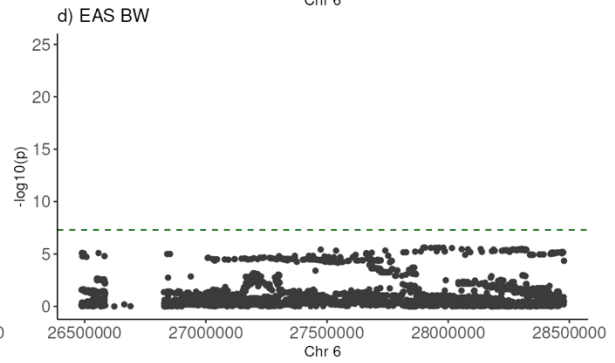

Trait BW: probe cg15325629

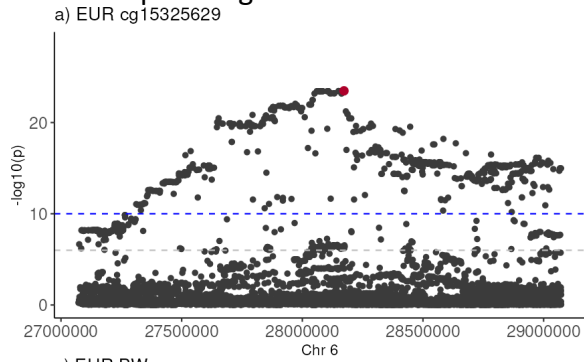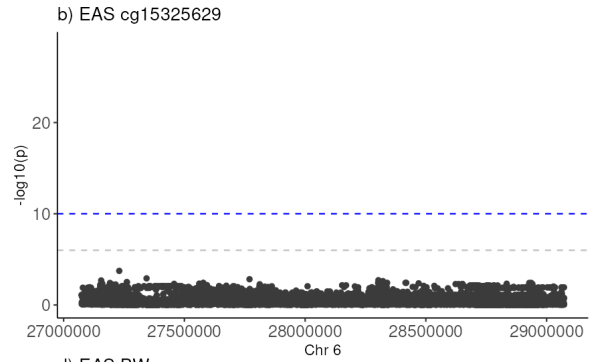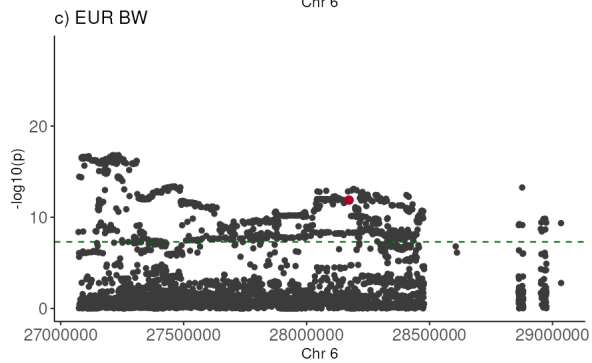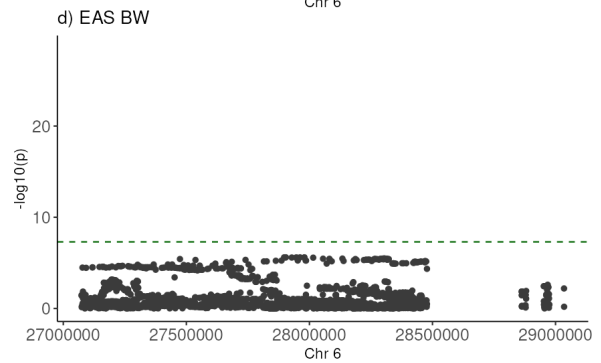

Trait BW: probe cg15967709

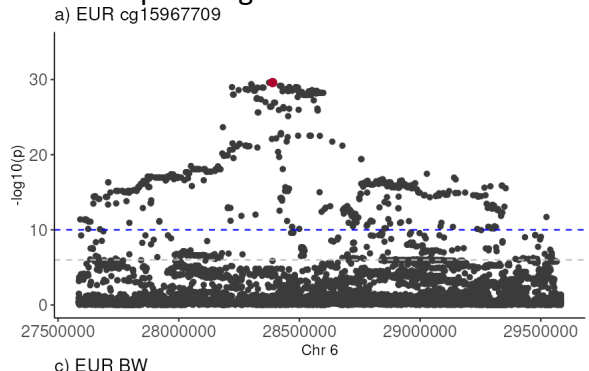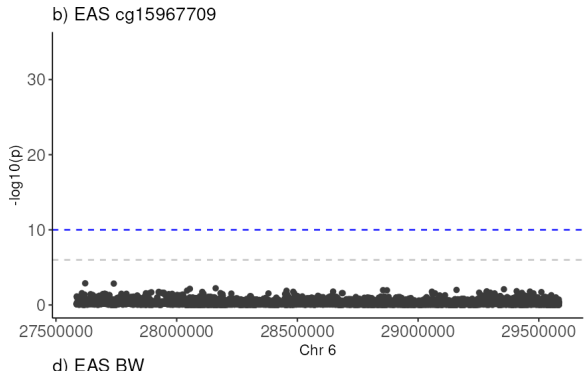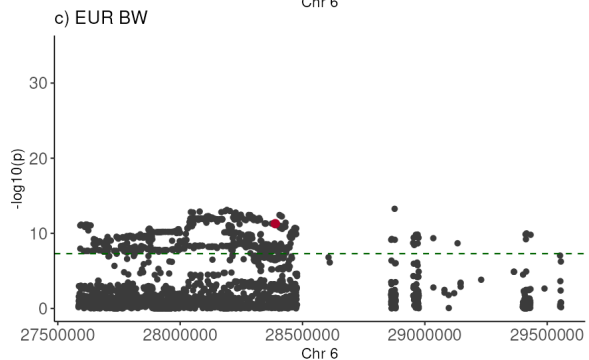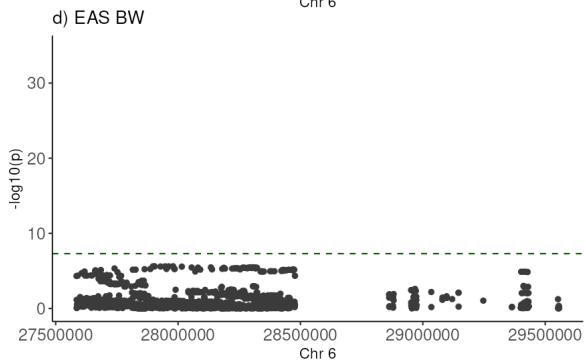

Trait BW: probe cg22087367

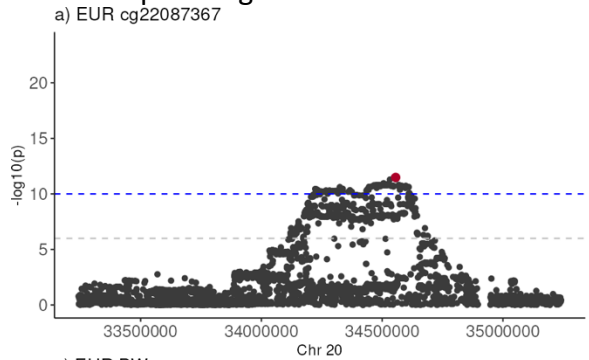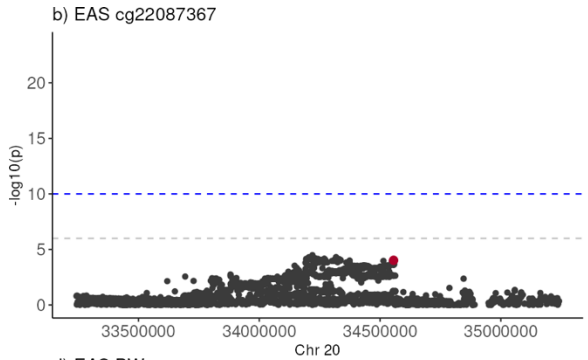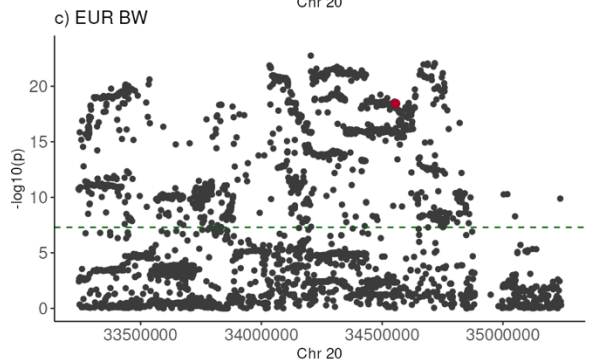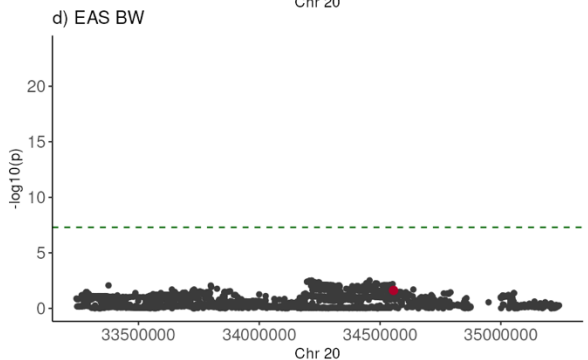

**Trait C03: probe cg06068085**

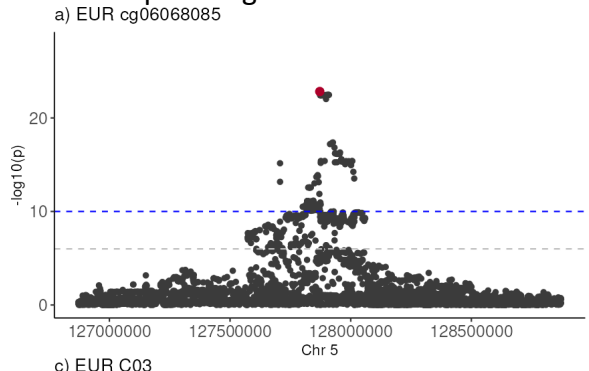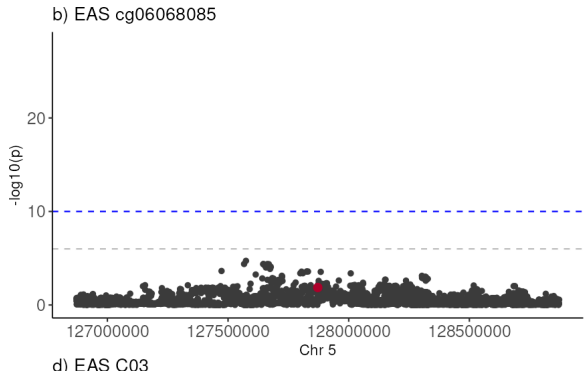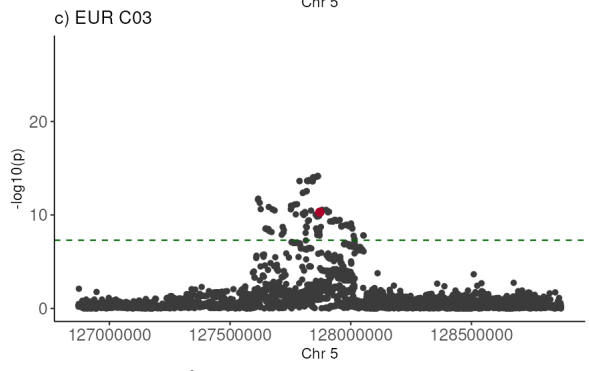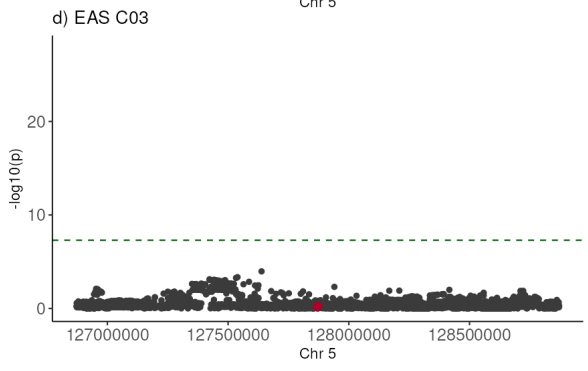

**Trait C07: probe cg06068085**

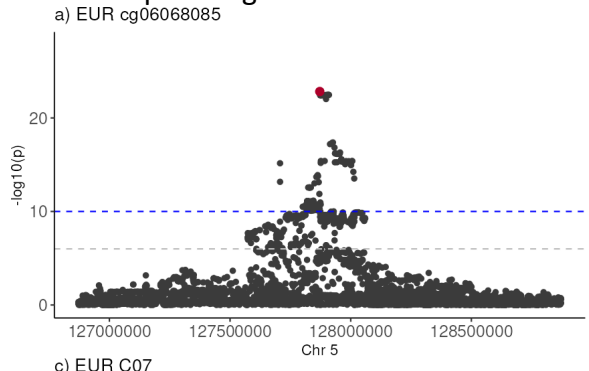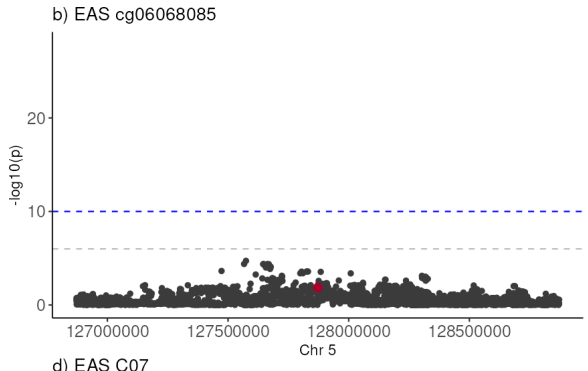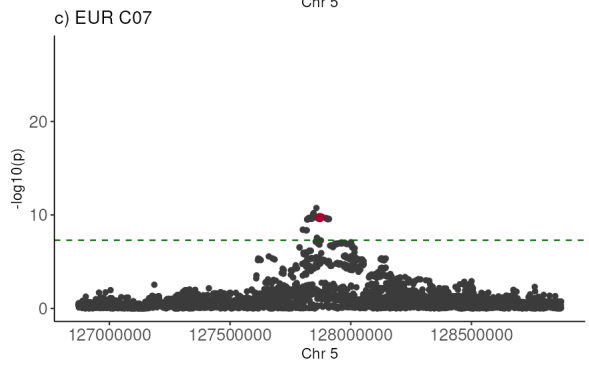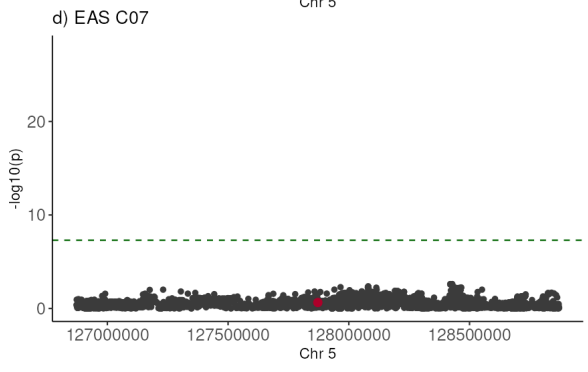



**Trait C08: probe cg06068085**

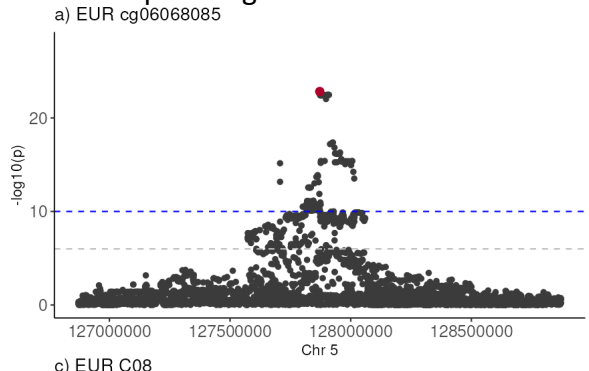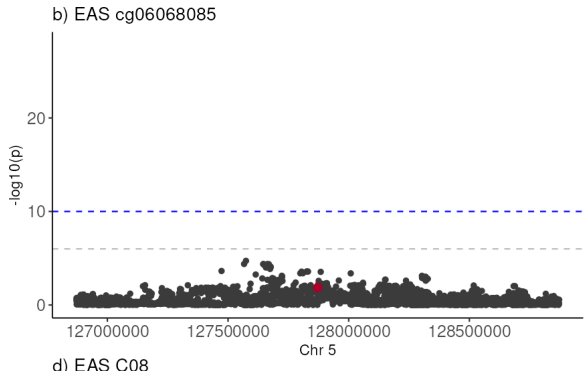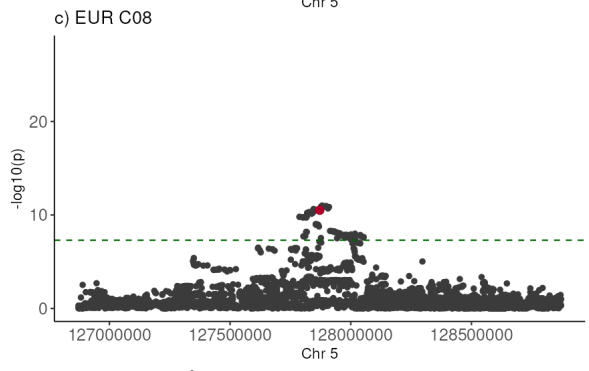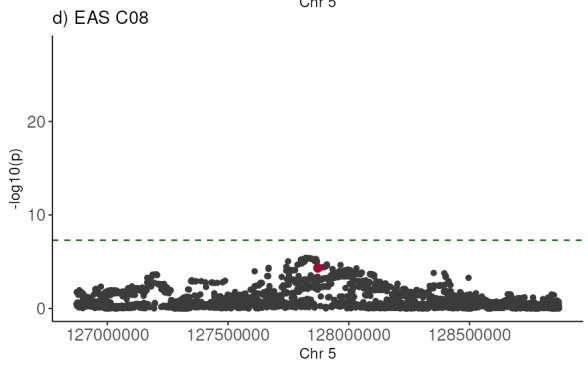

**Trait C09: probe cg06068085**

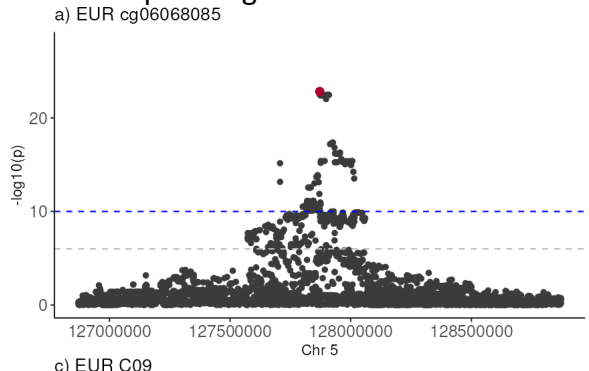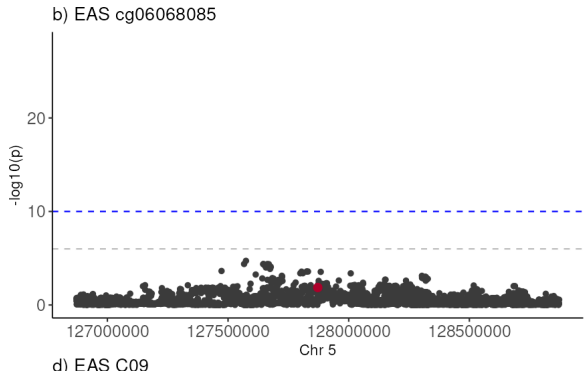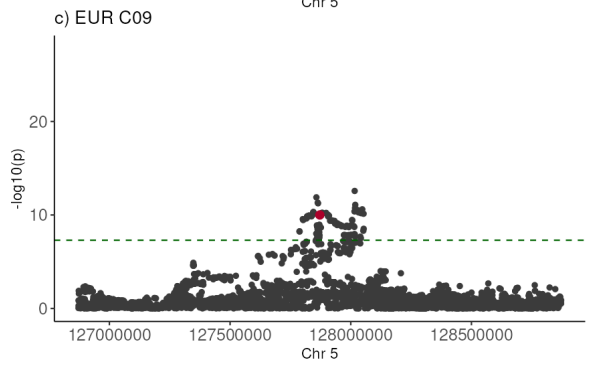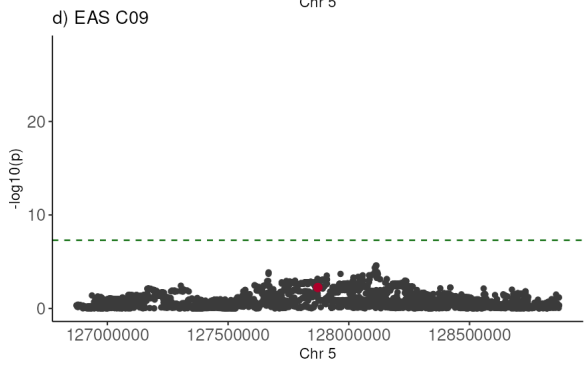

### Trait C09: probe cg01046511

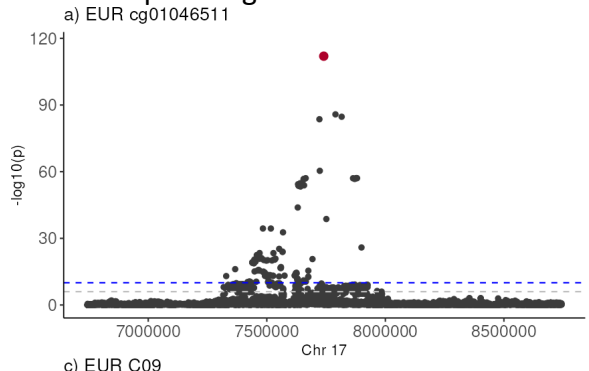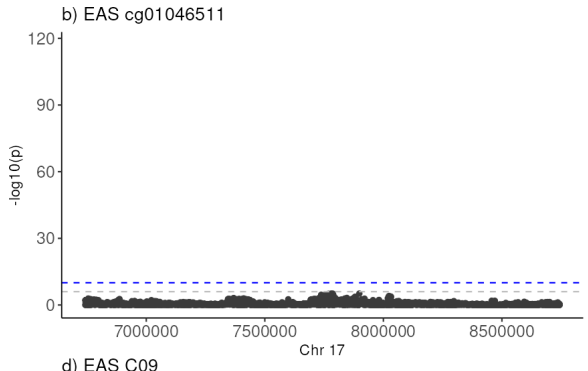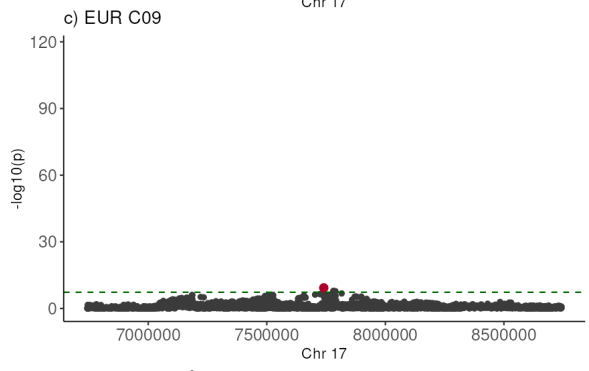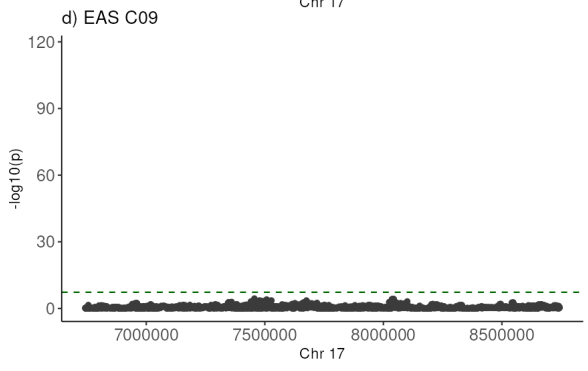

### Trait C09: probe cg01656853

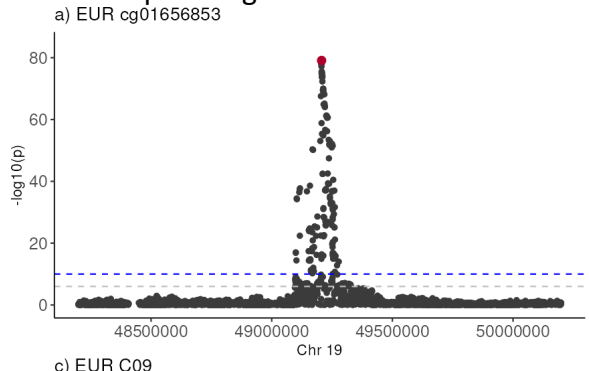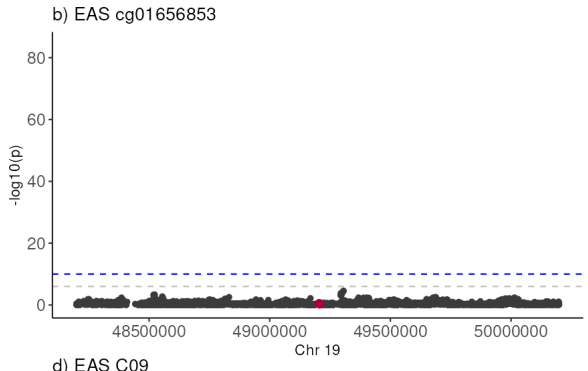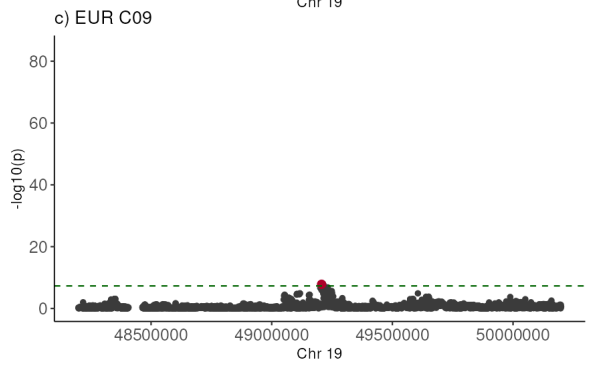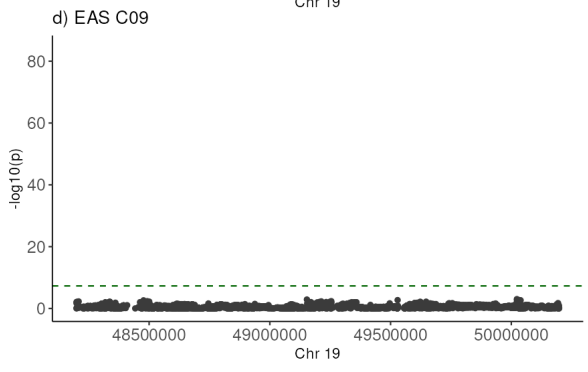

**Trait C09: probe cg08873673**

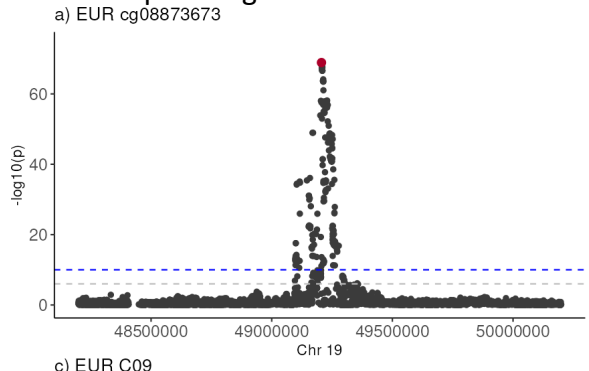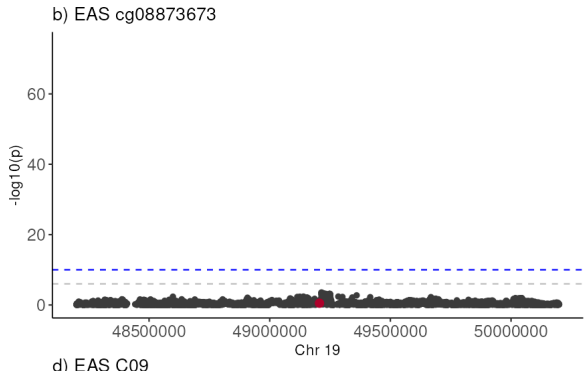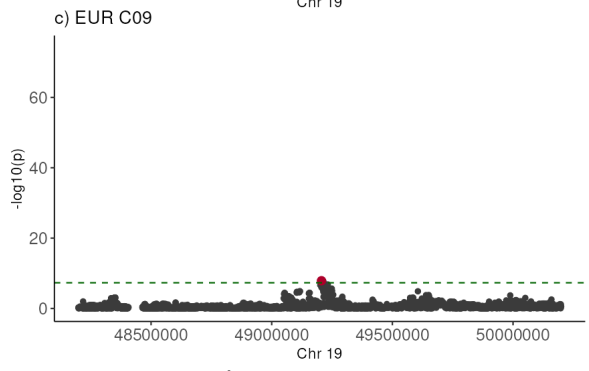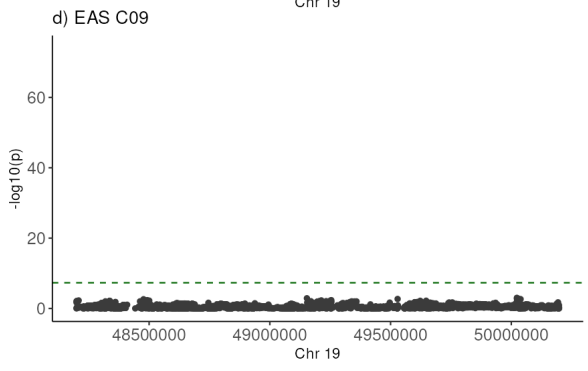

**Trait C10AA: probe cg01656853**

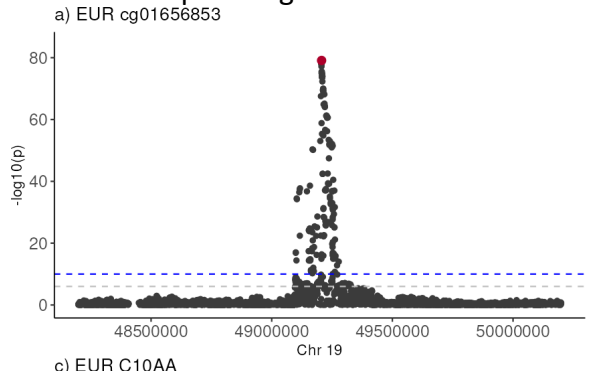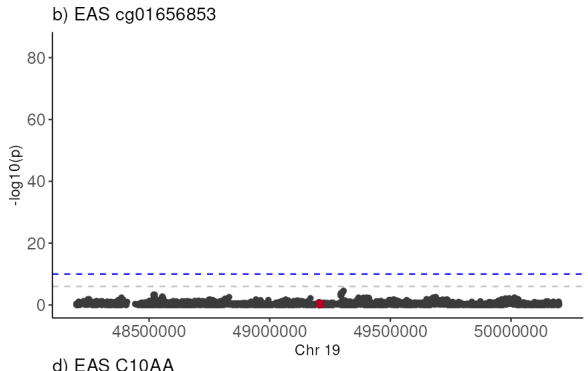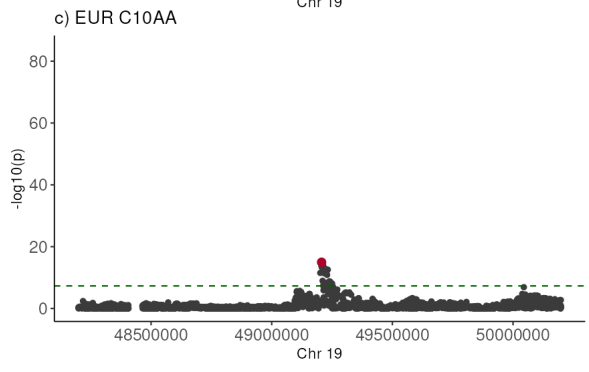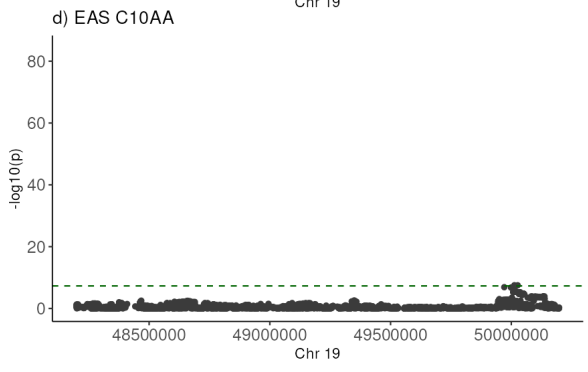

Trait C10AA: probe cg08873673

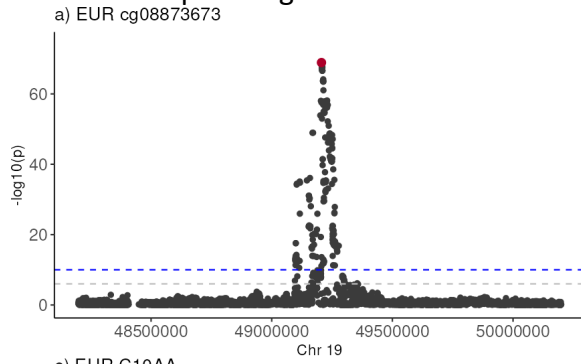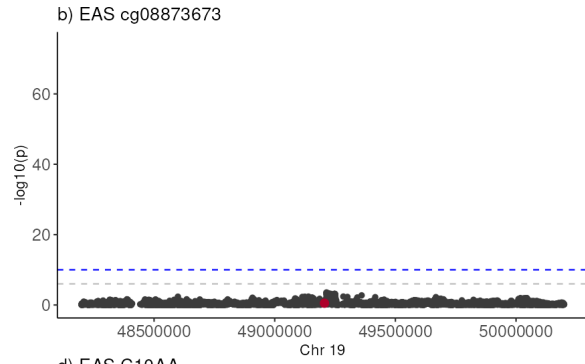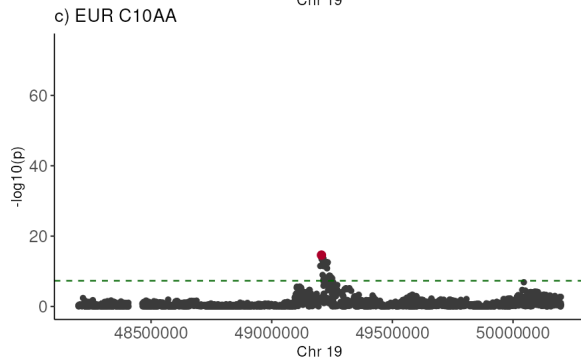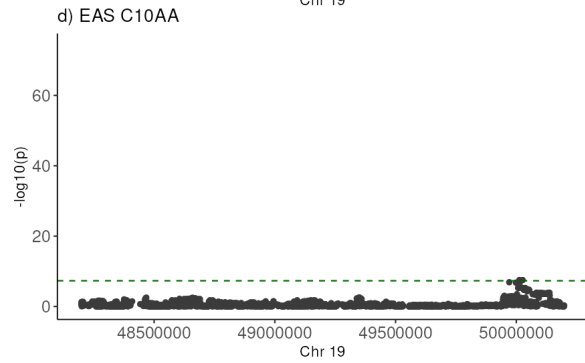

Trait C10AA: probe cg20441902

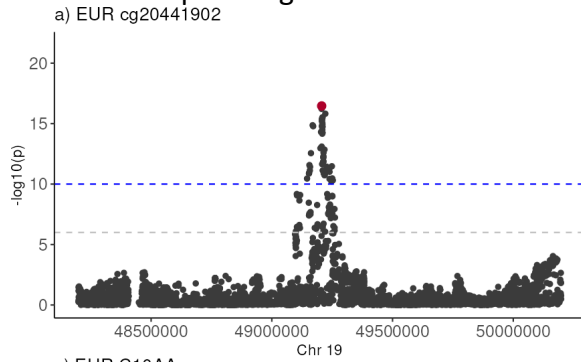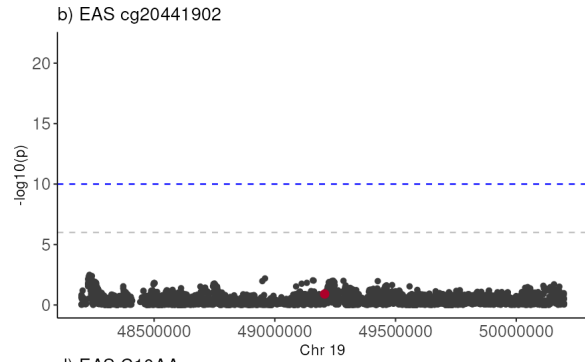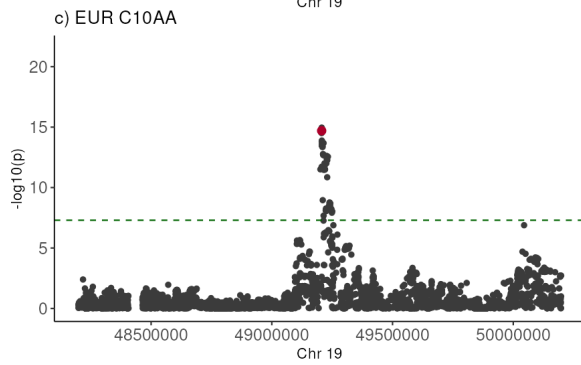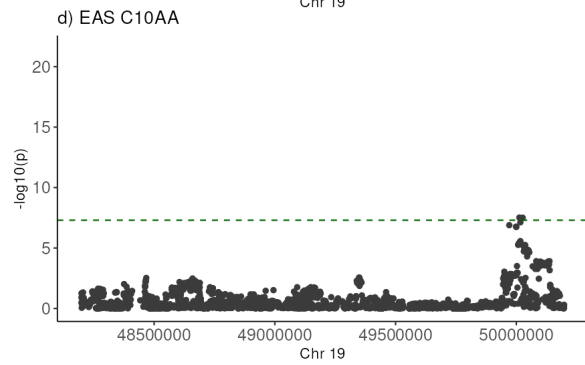

Trait Ca: probe cg00228796

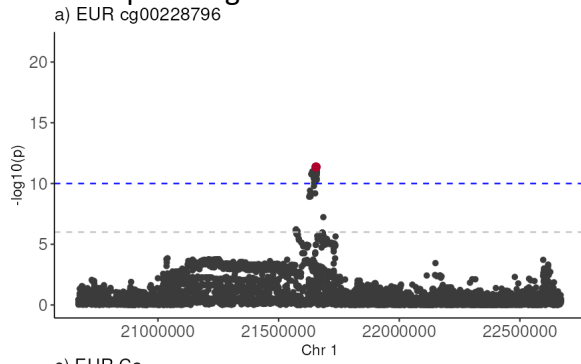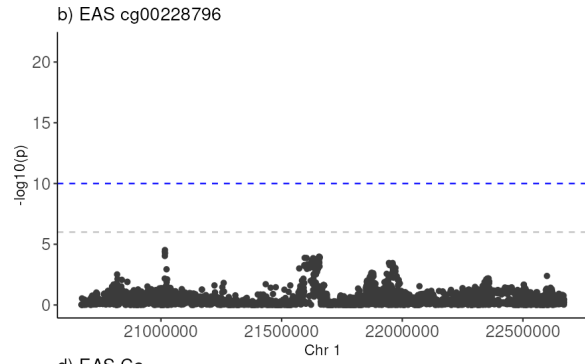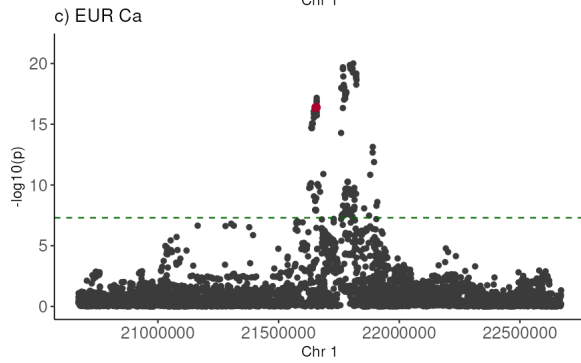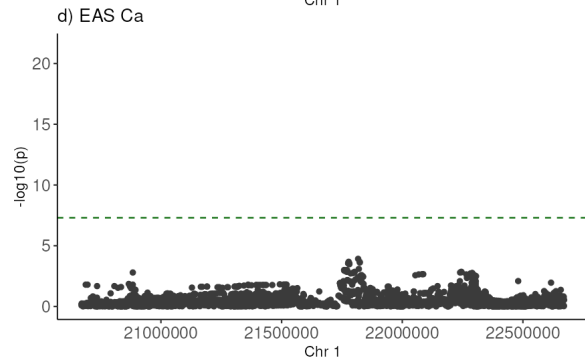

Trait Ca: probe cg03020951

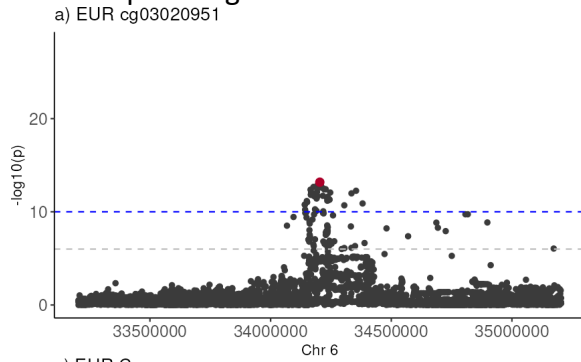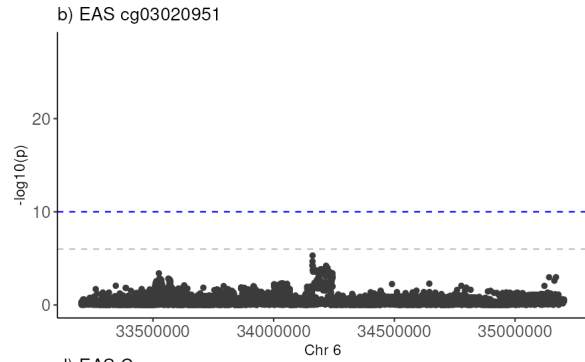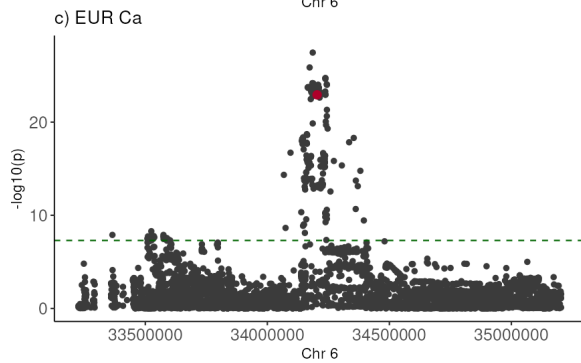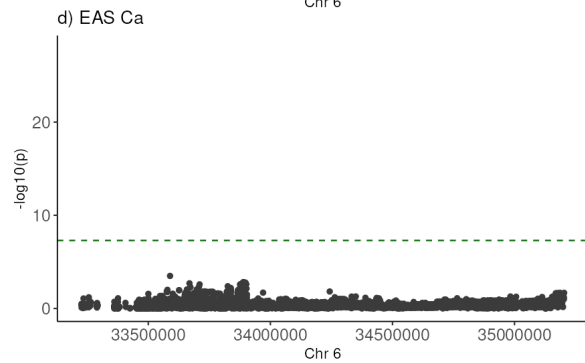

**Trait Cho: probe cg01656853**

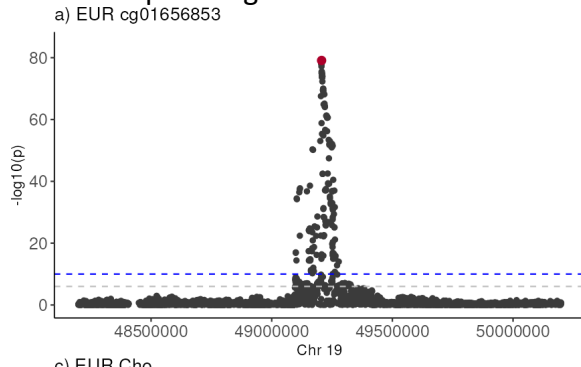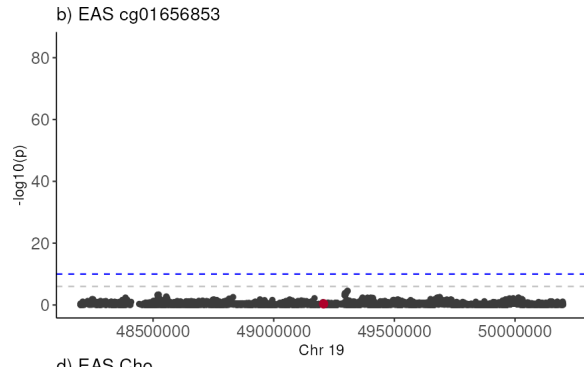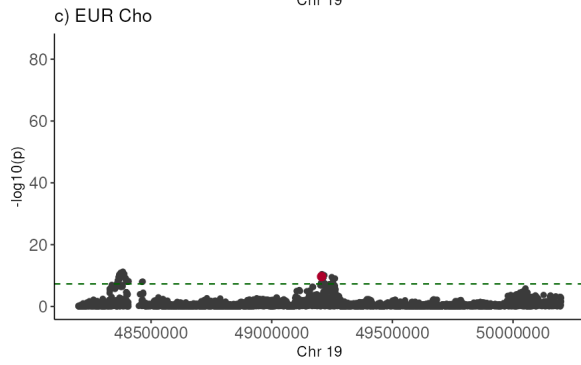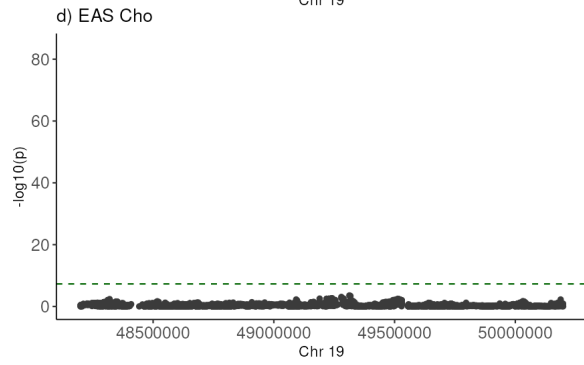

**Trait Cho: probe cg08873673**

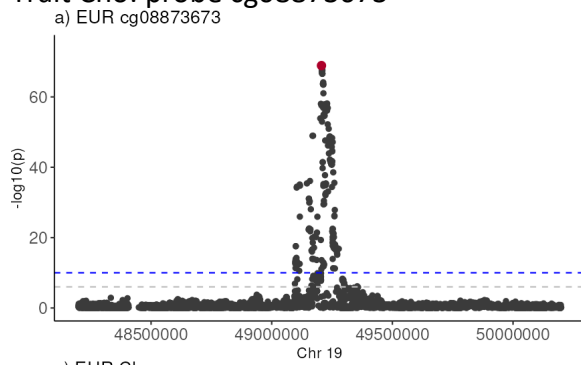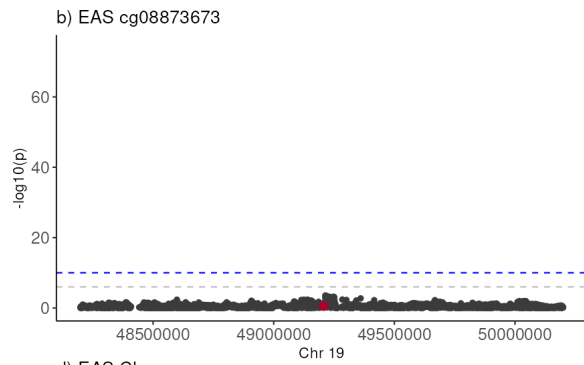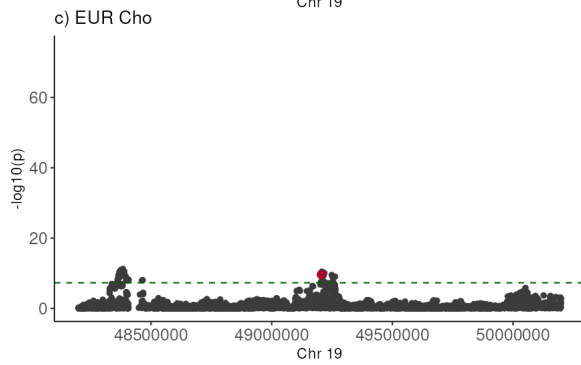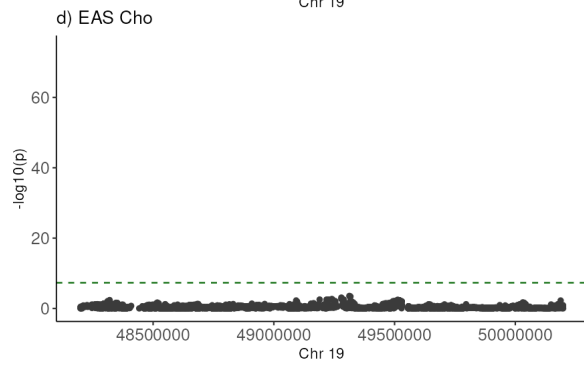

### Trait CRP: probe cg23571126

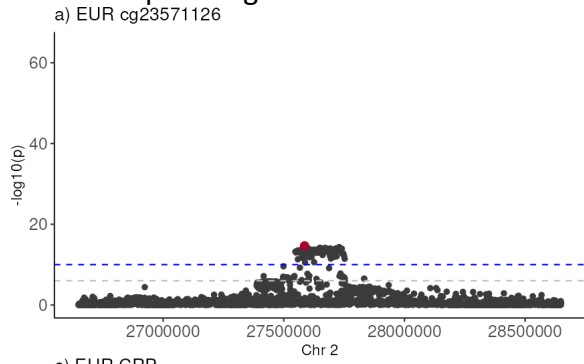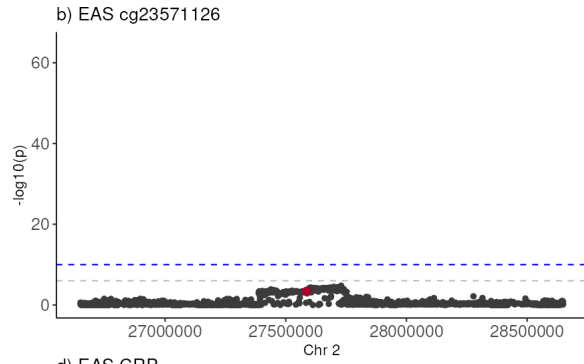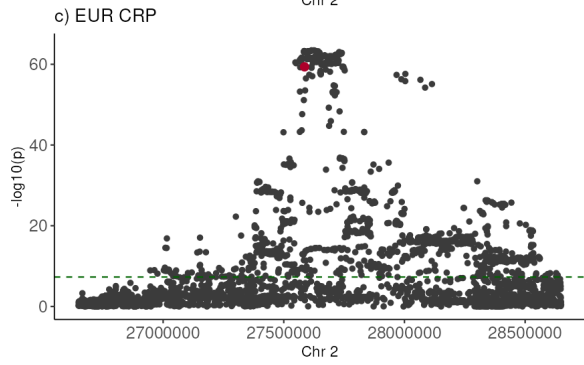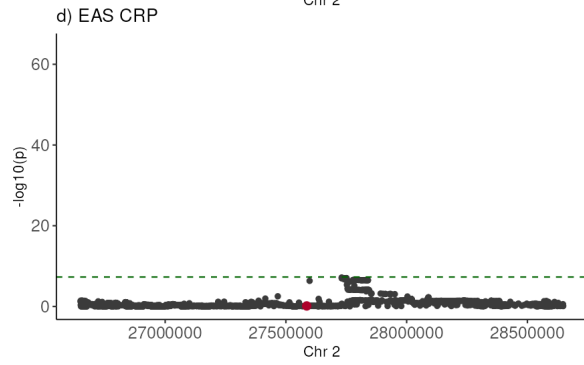

### Trait CRP: probe cg09642020

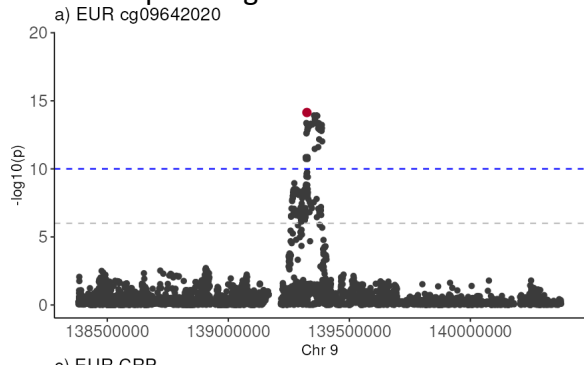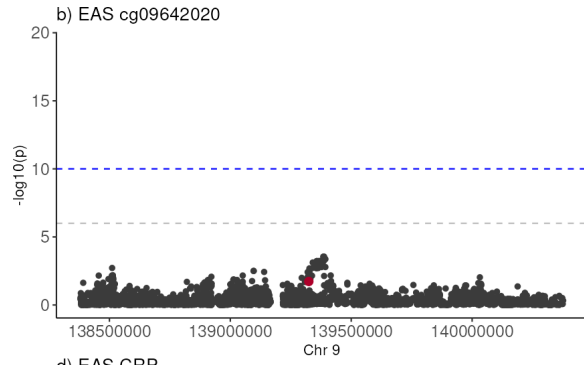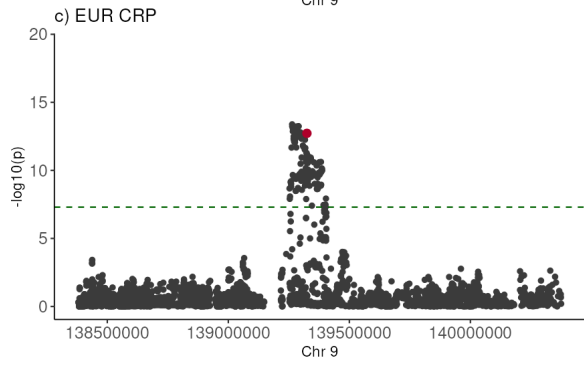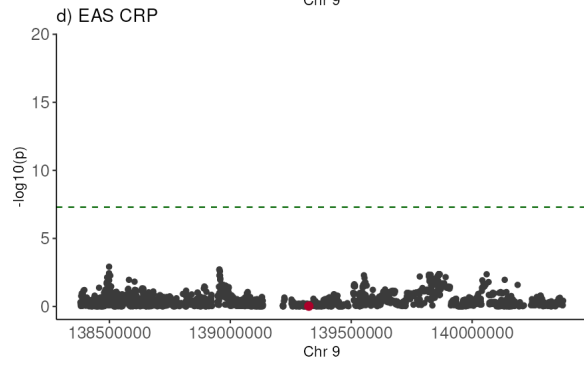

Trait DBP: probe cg22988851

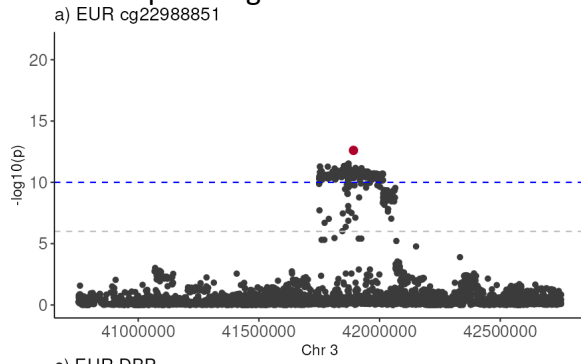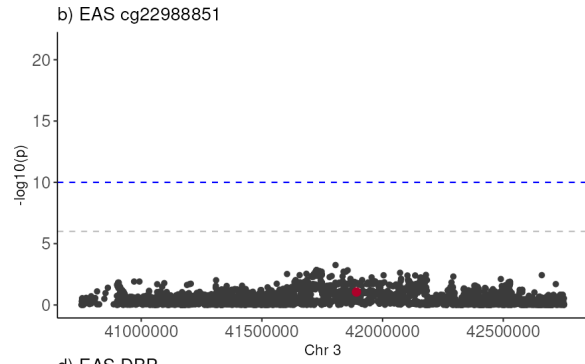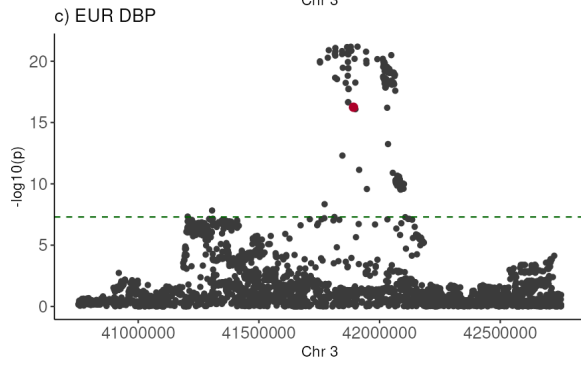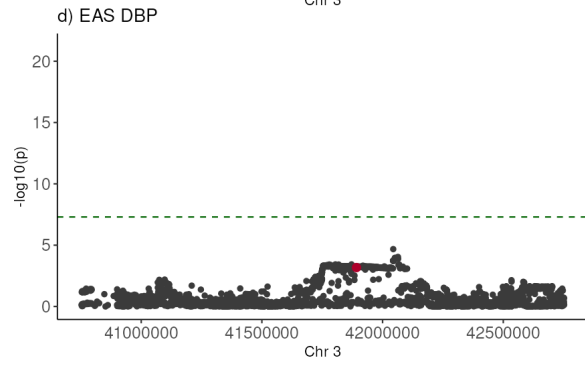

Trait DBP: probe cg21959090

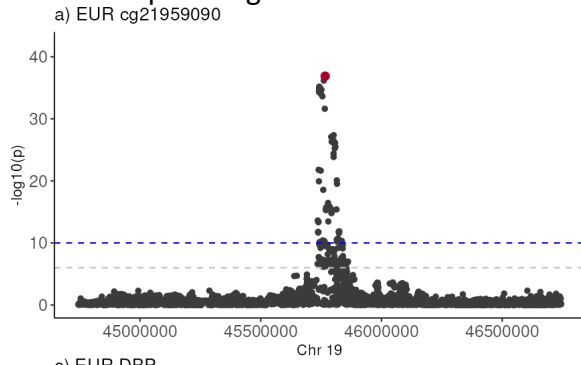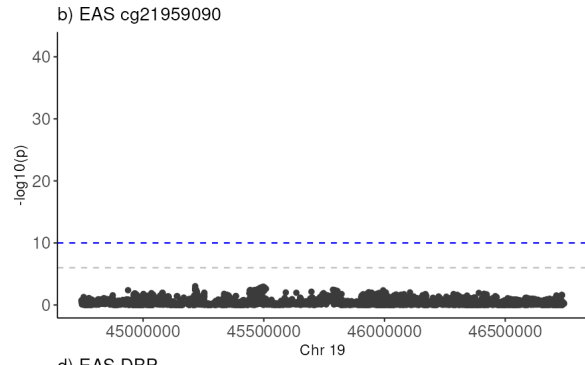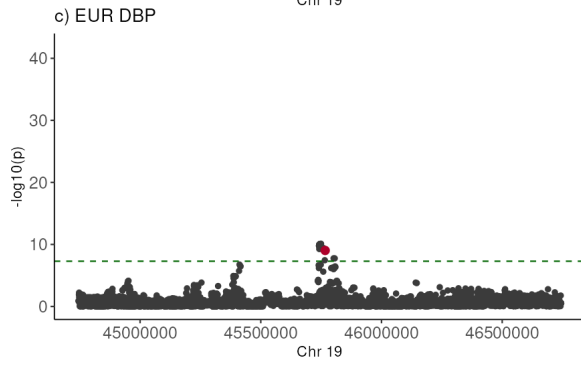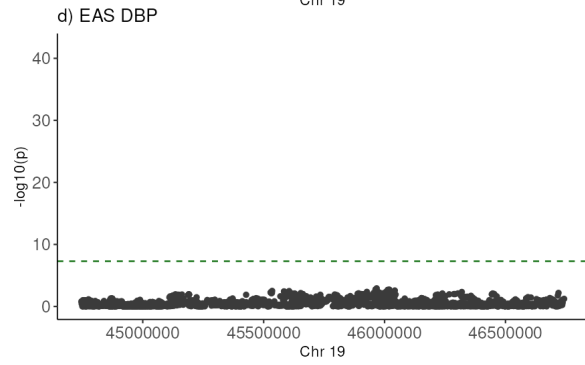



### Trait Eosino: probe cg06760507

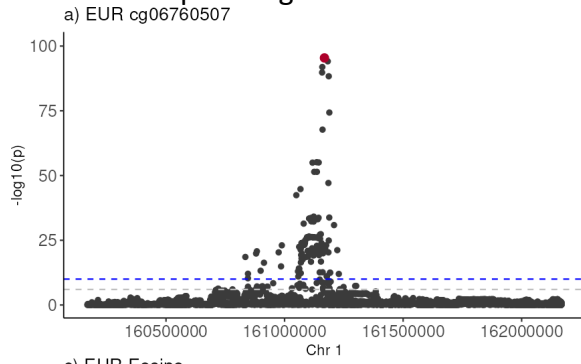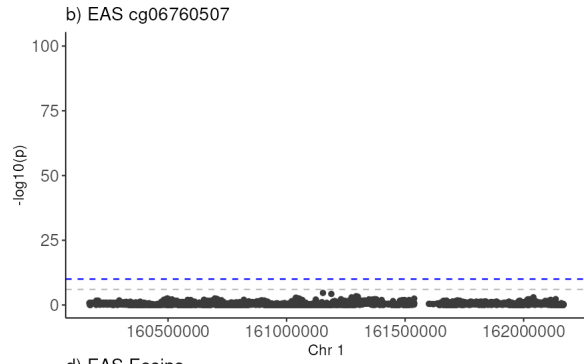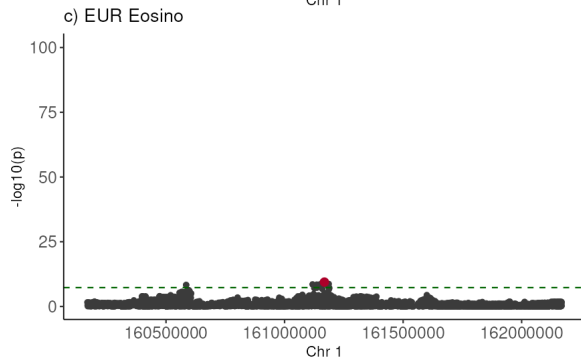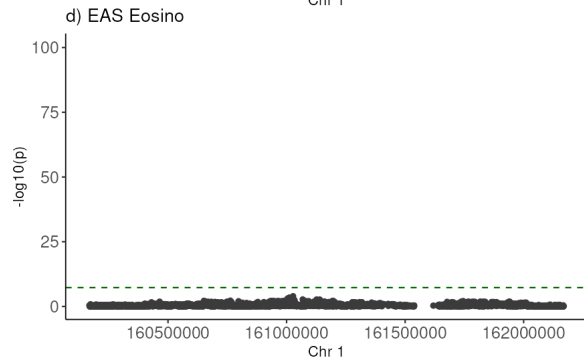

### Trait Eosino: probe cg16597045

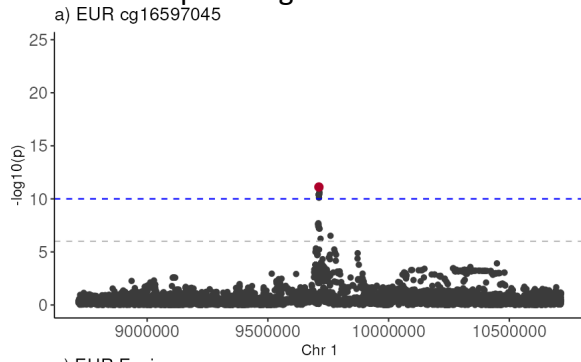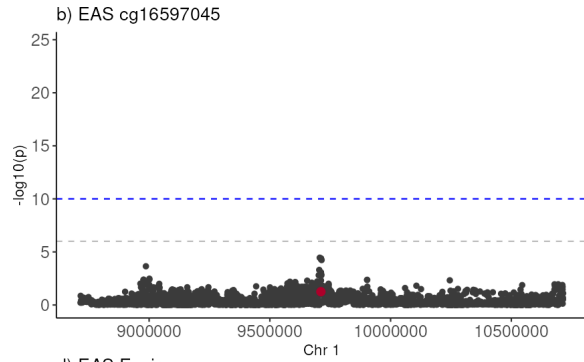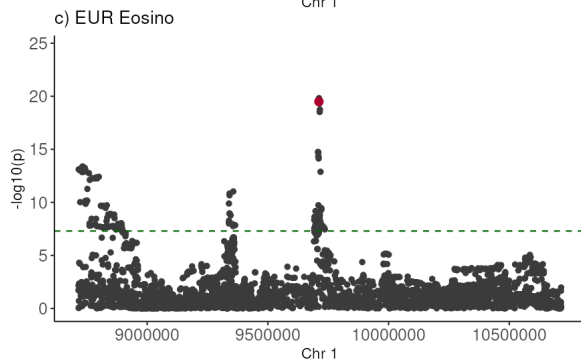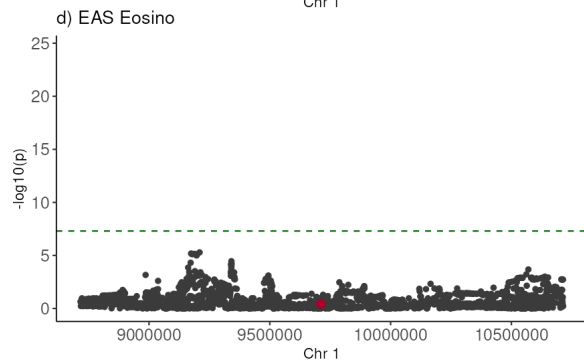

### Trait Eosino: probe cg01765152

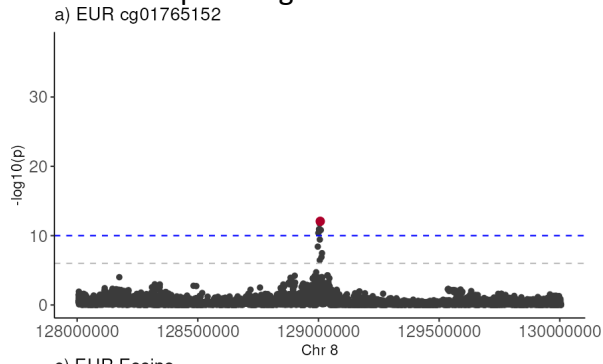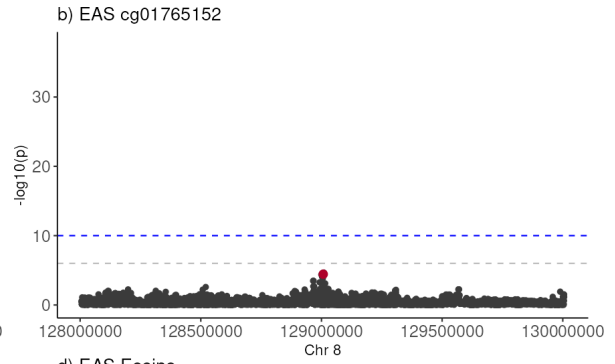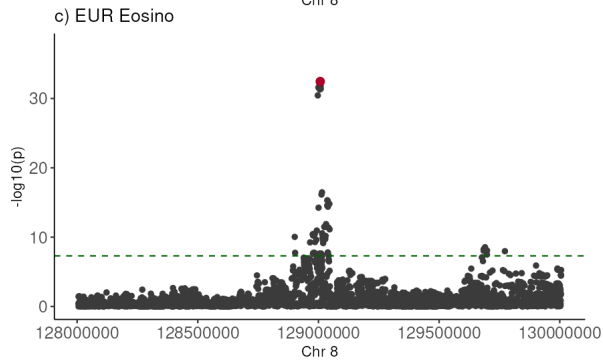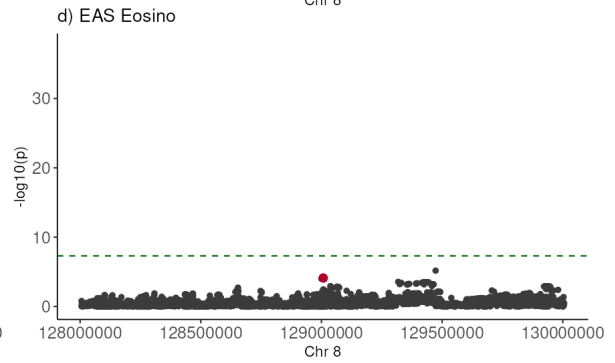

### Trait Eosino: probe cg22504024

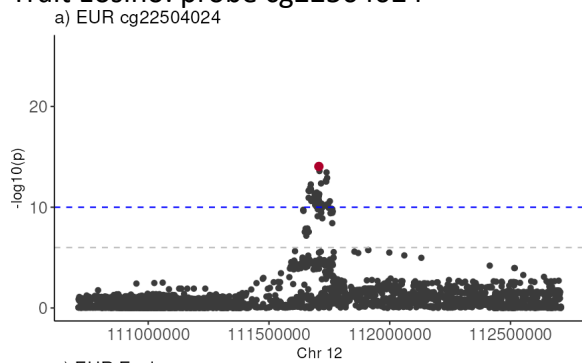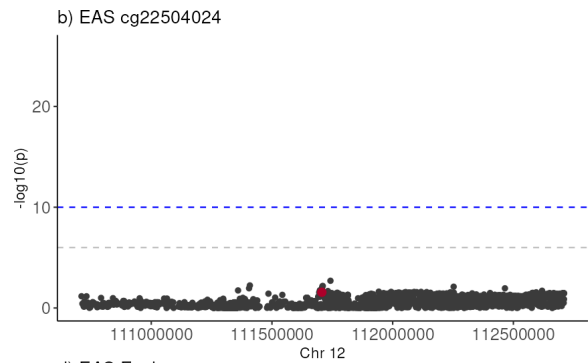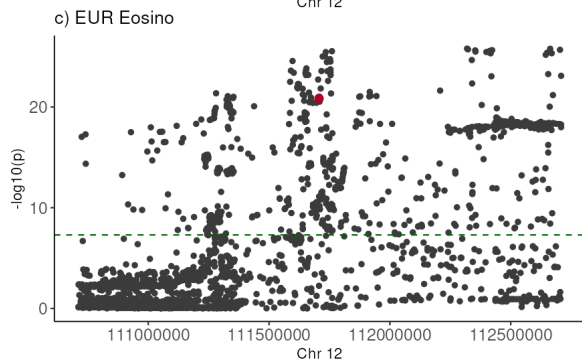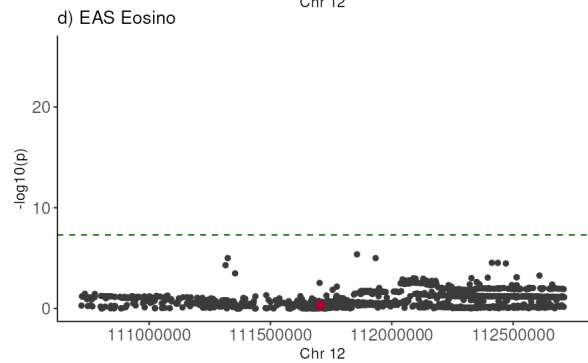

### Trait Eosino: probe cg01692252

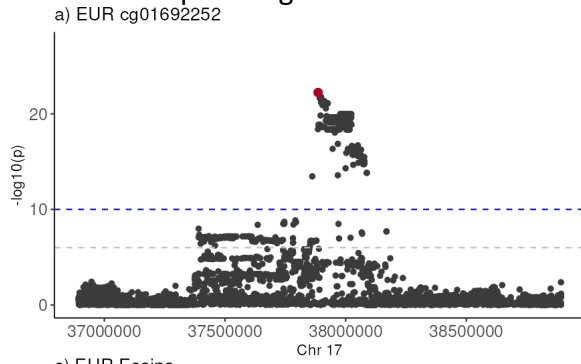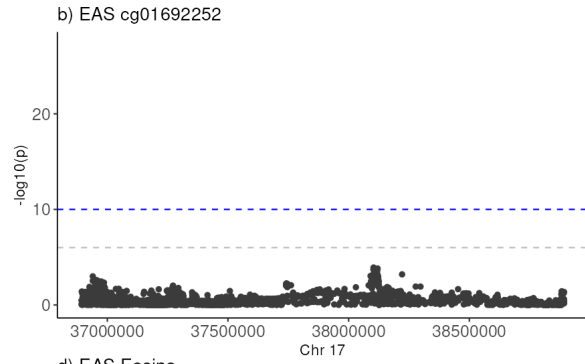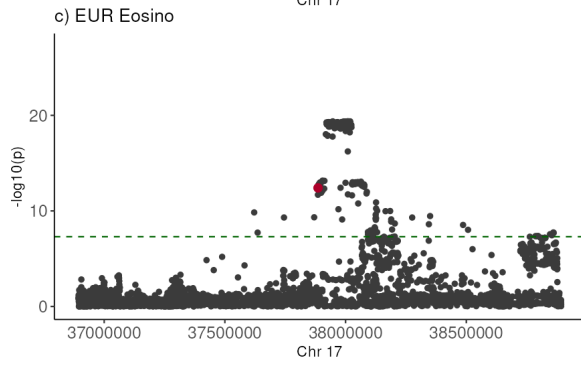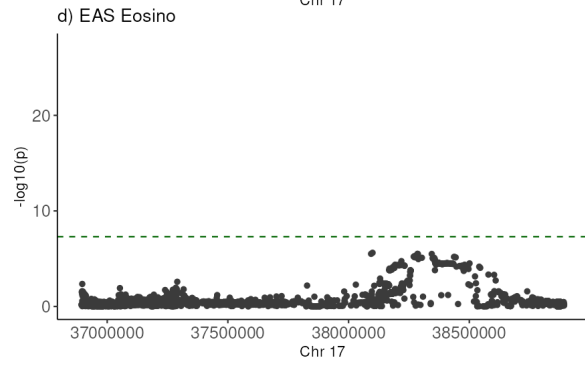

### Trait Eosino: probe cg14112635

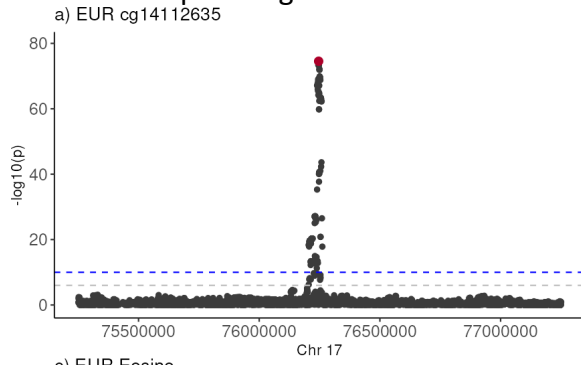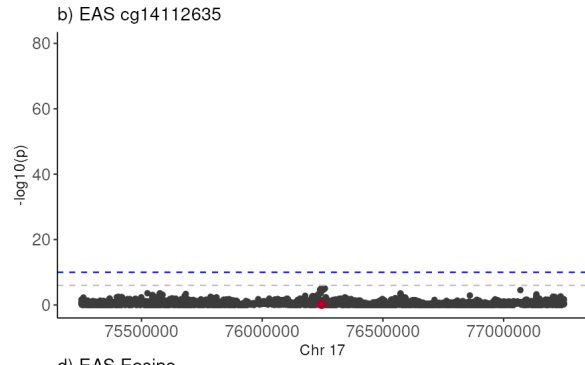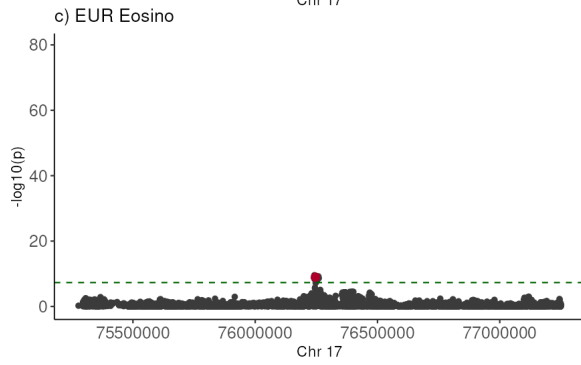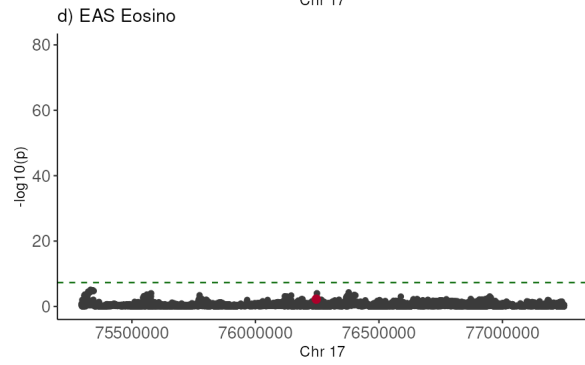

### Trait Eosino: probe cg21959090

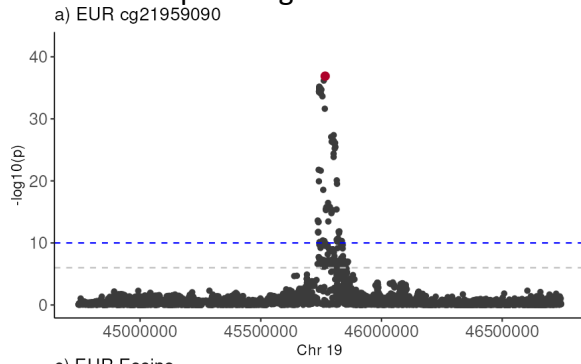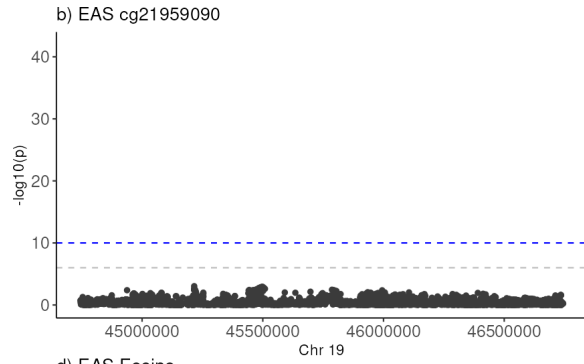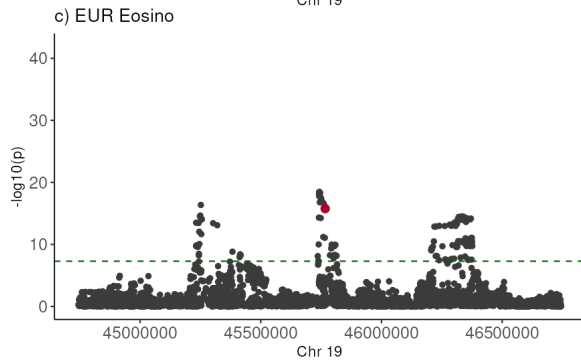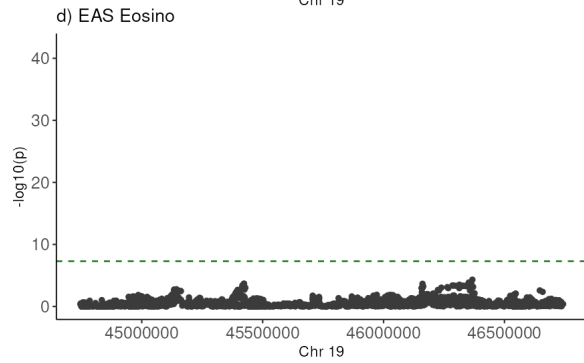

### Trait GGT: probe cg13235717

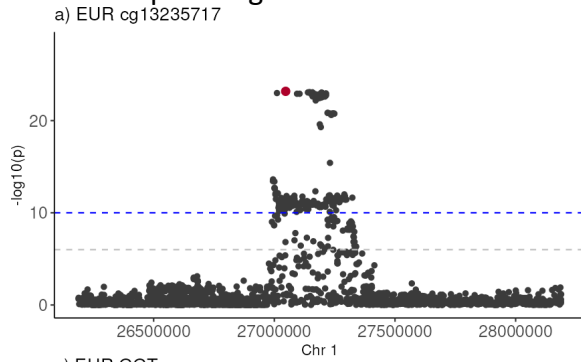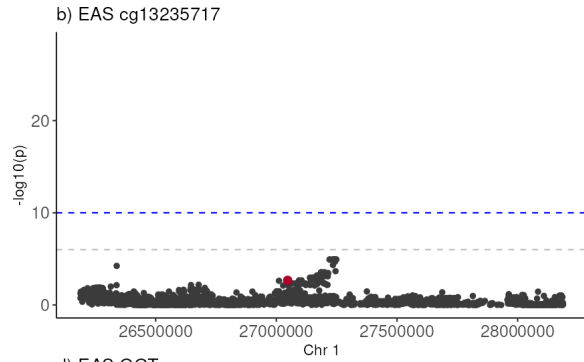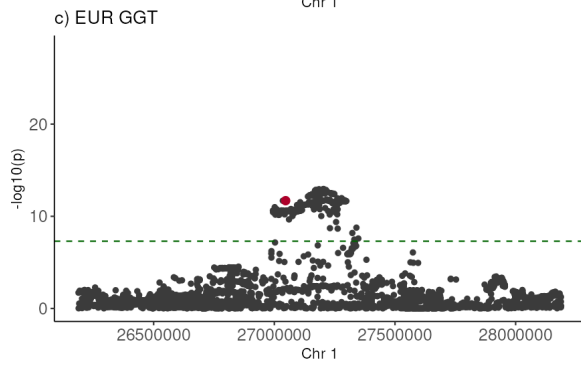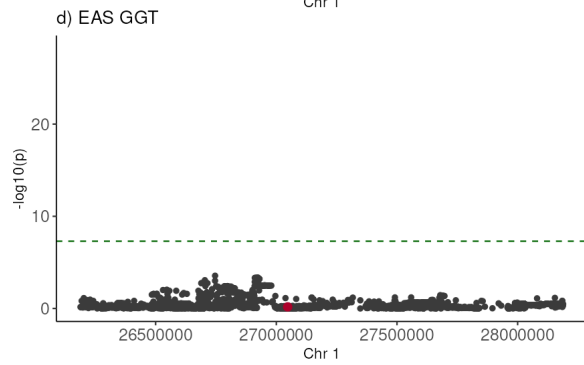

### Trait GGT: probe cg00409636

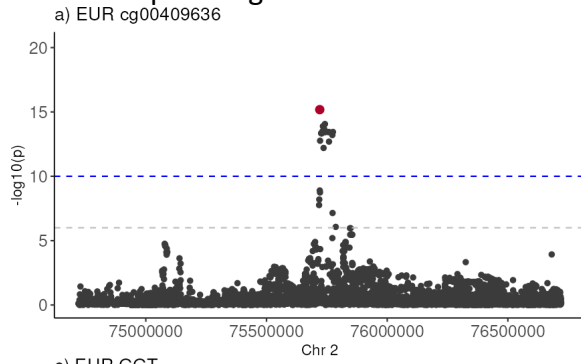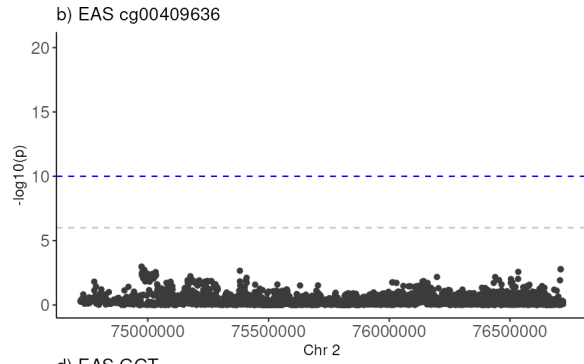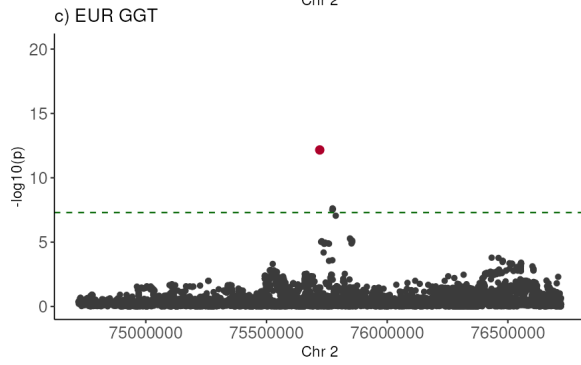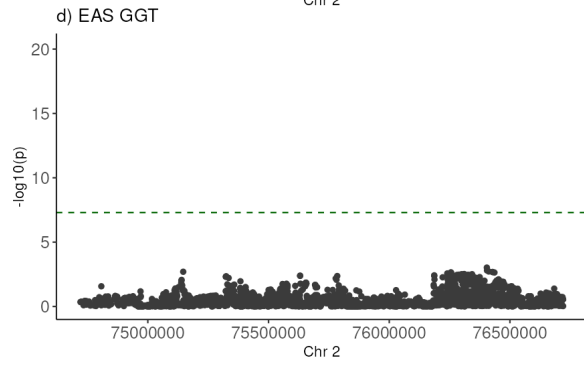

### Trait GGT: probe cg05914712

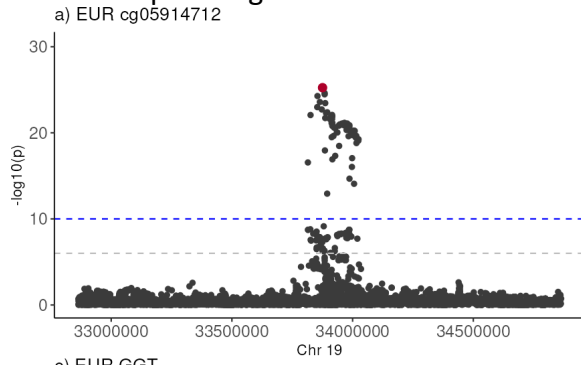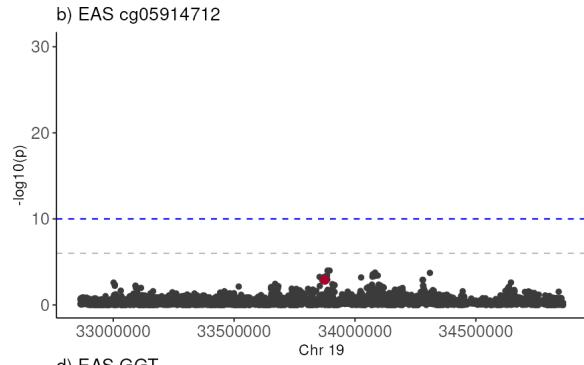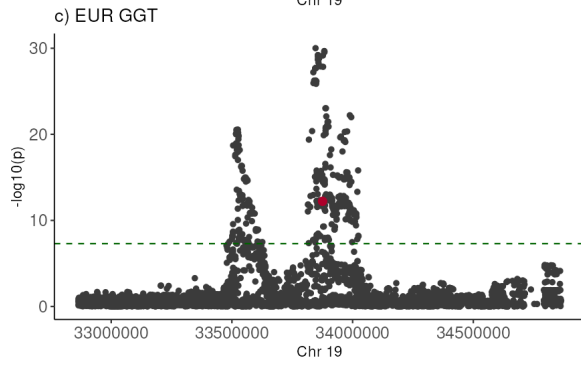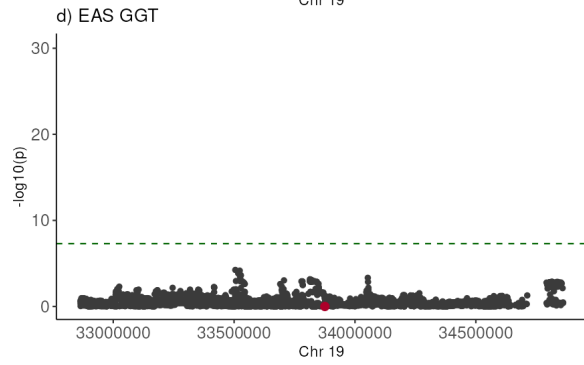

### Trait GGT: probe cg09479818

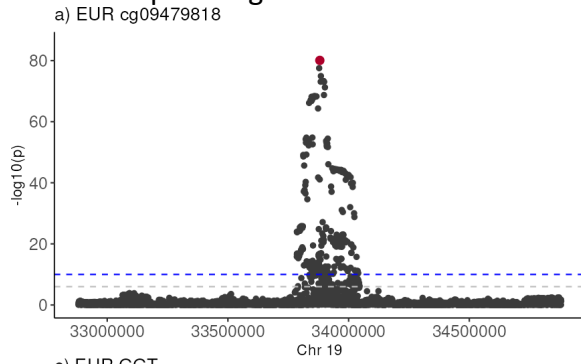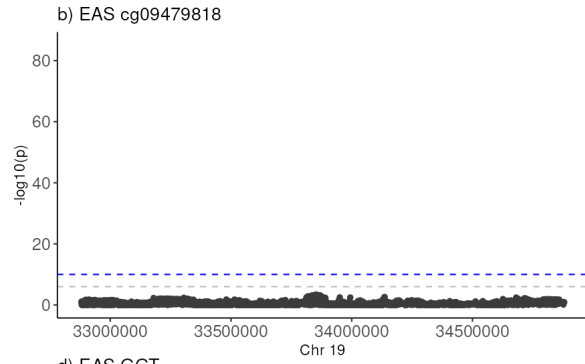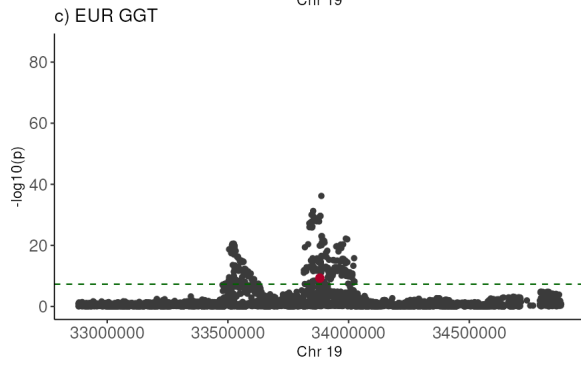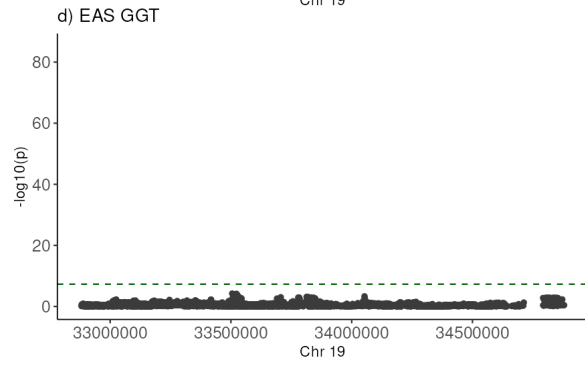

### Trait Gla: probe cg24023194

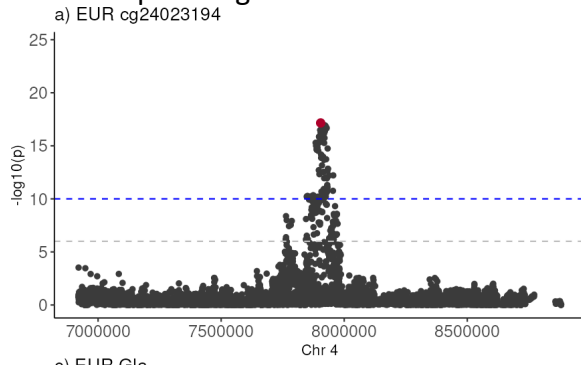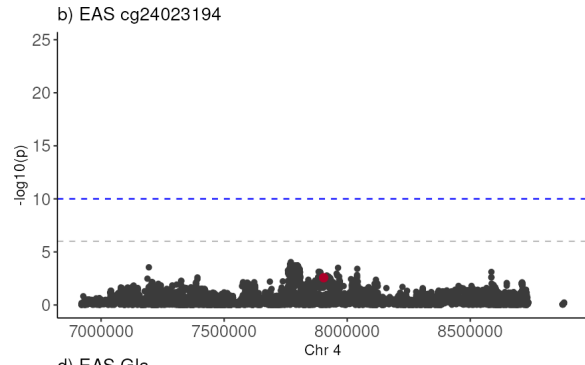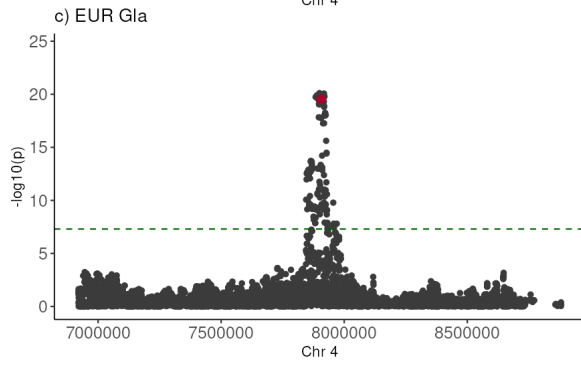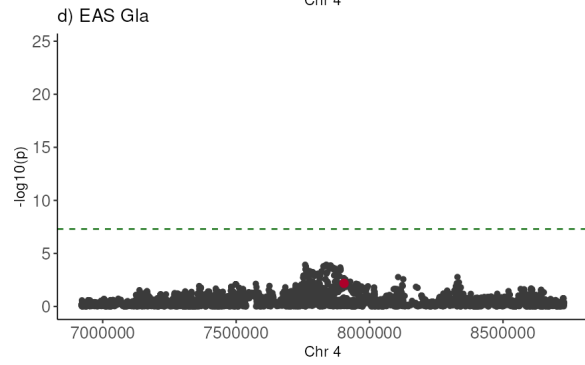

Trait Goi: probe cg11258943

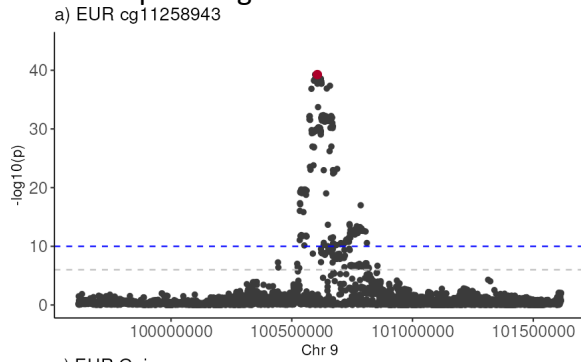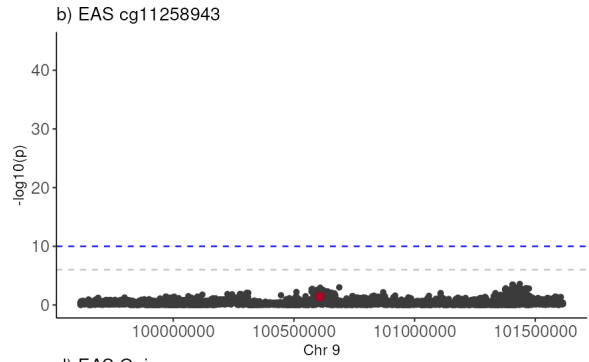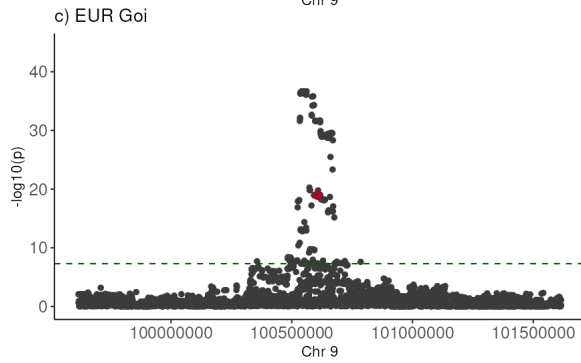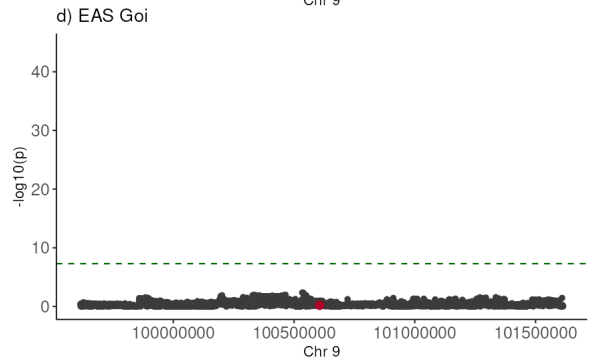

Trait Goi: probe cg13827859

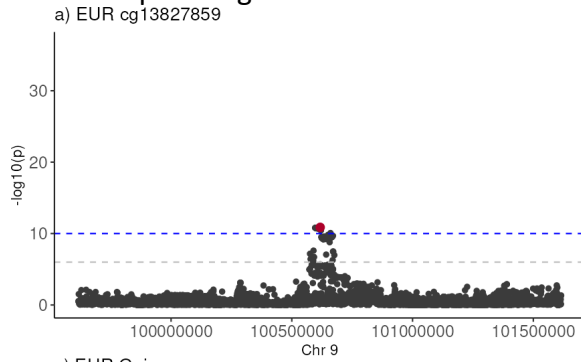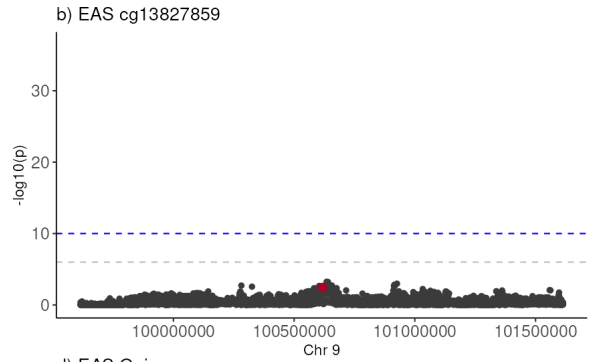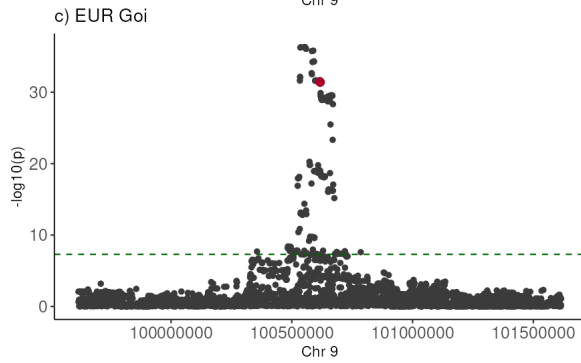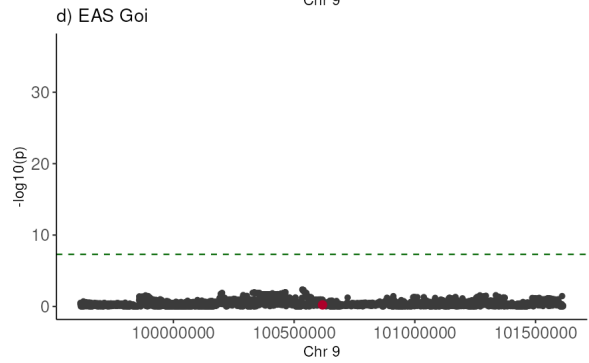

### Trait H03A: probe cg19084075

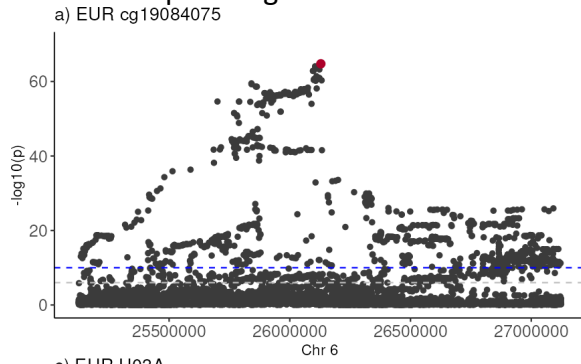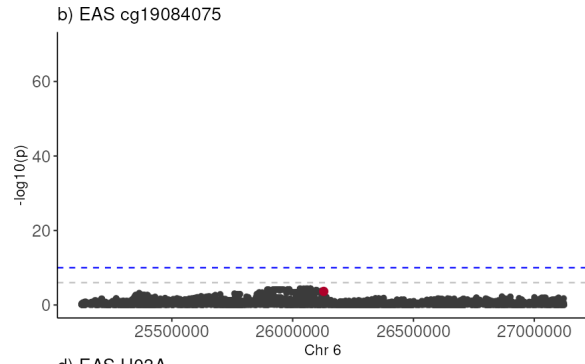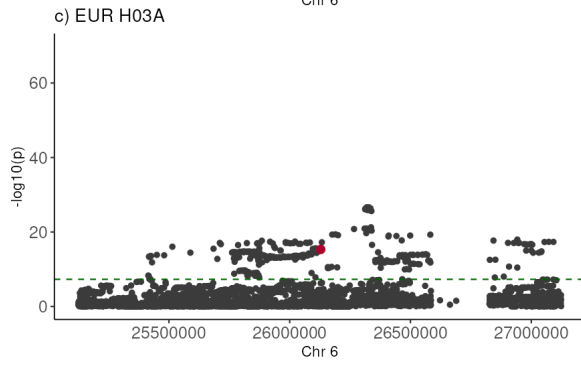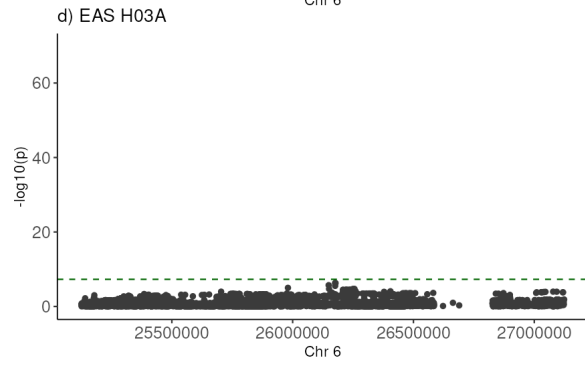

### Trait H03A: probe cg10458080

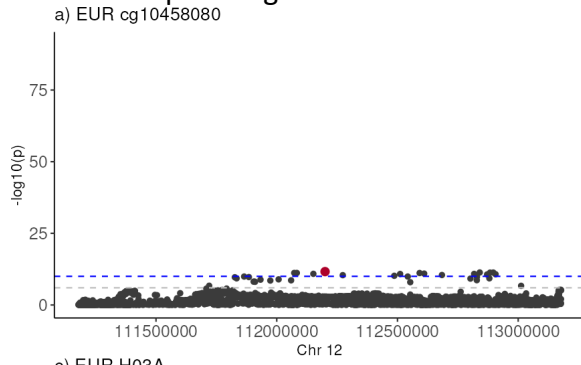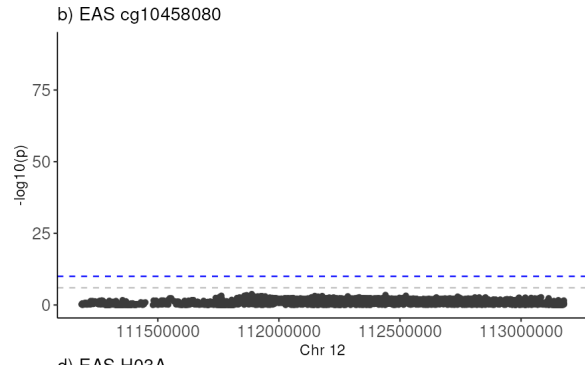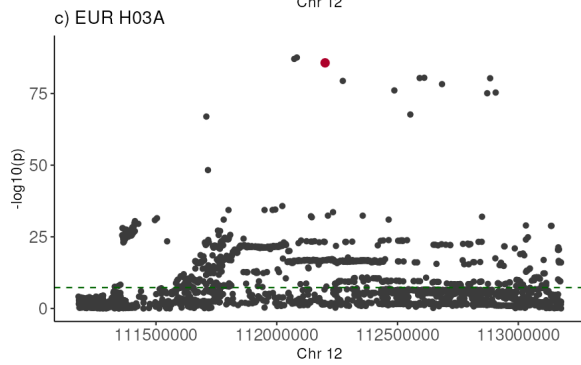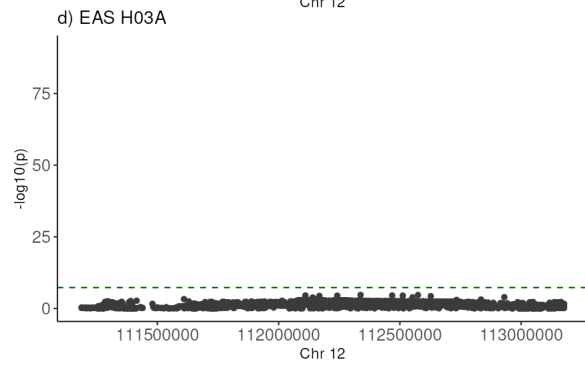



### Trait H03A: probe cg03982355

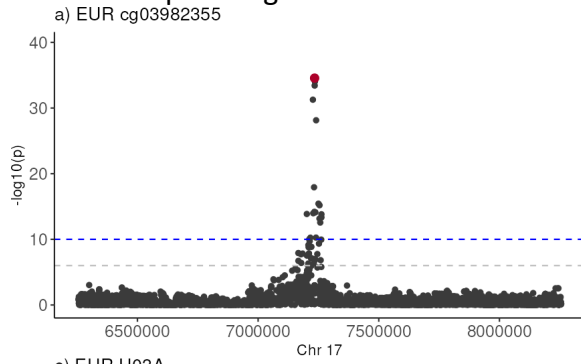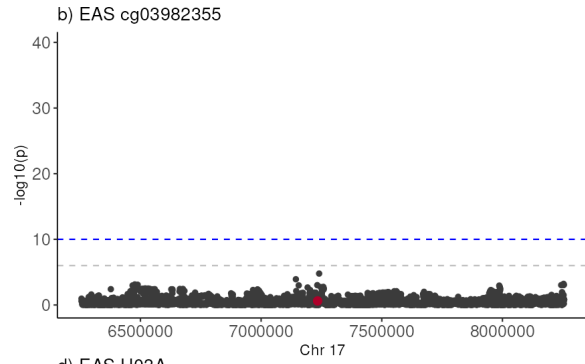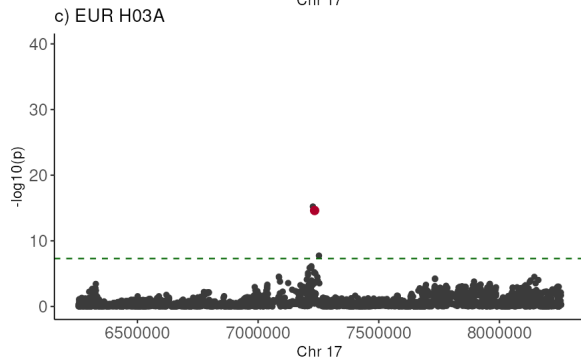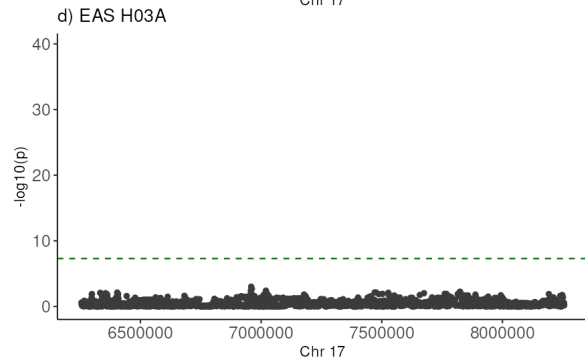

### Trait H03A: probe cg19175364

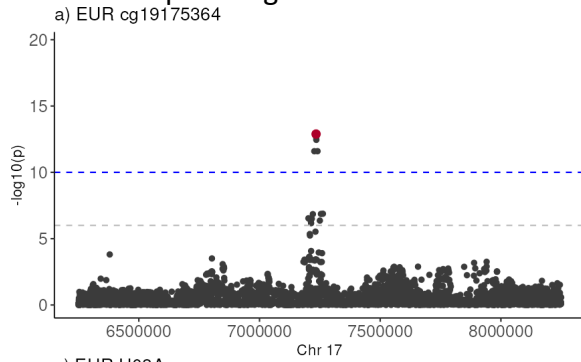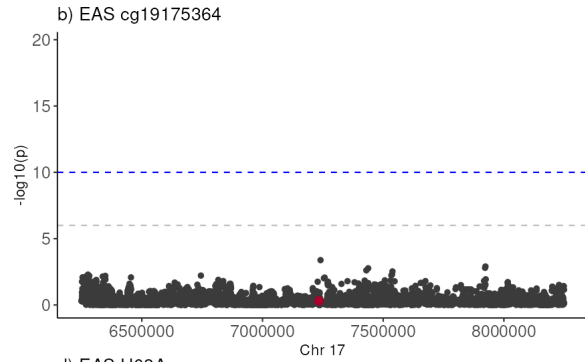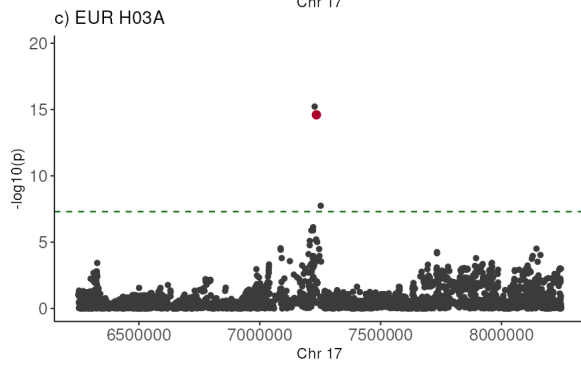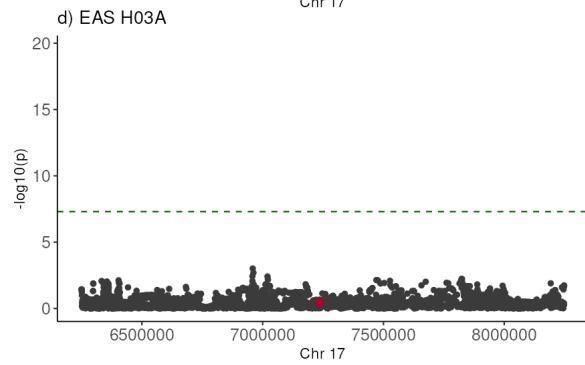

**Trait H03A: probe cg00507154**

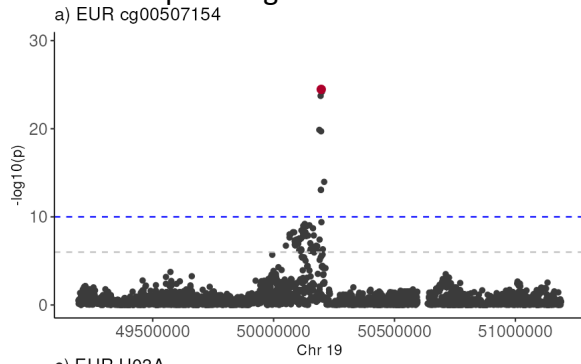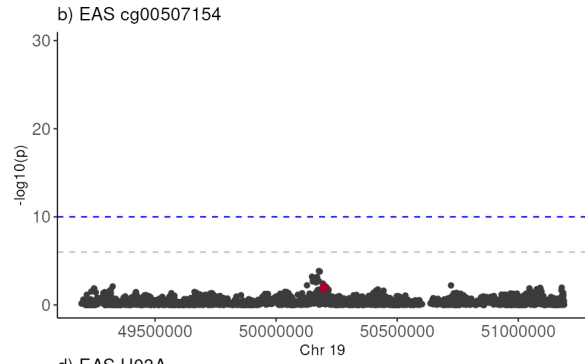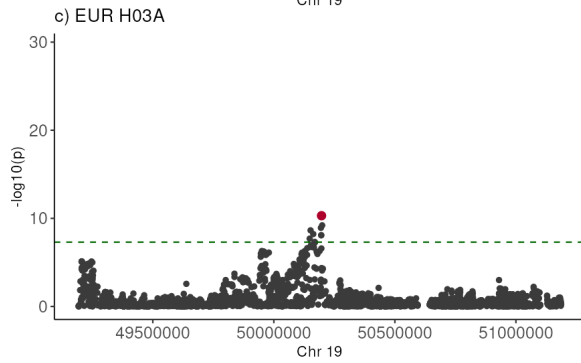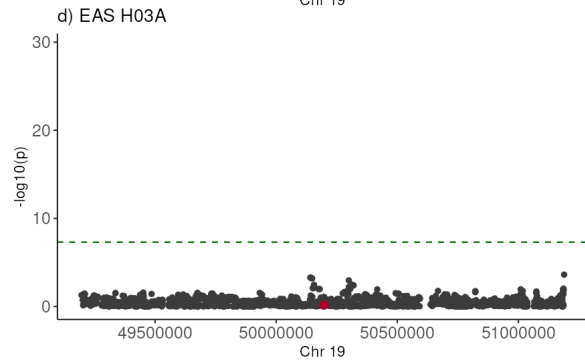

**Trait Hb: probe cg07140482**

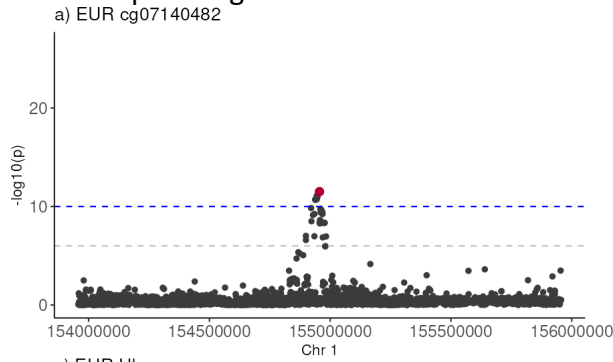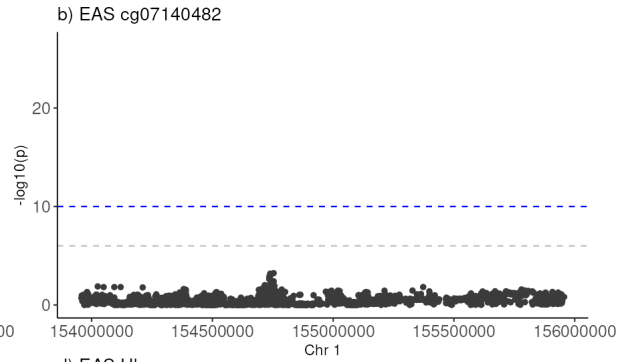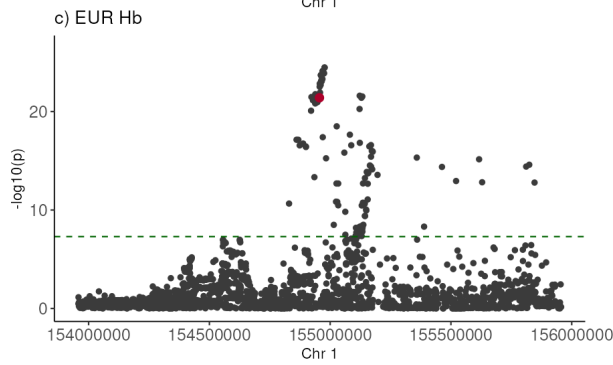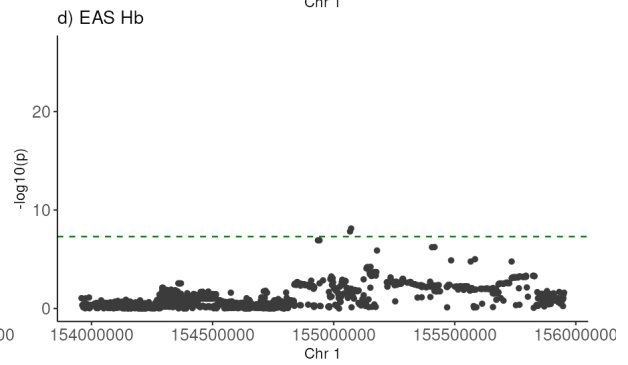

**Trait Hb: probe cg08360599**

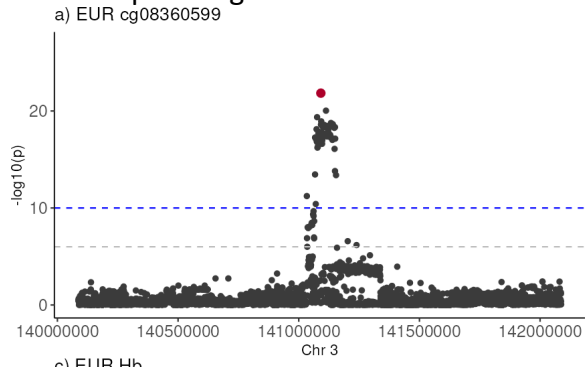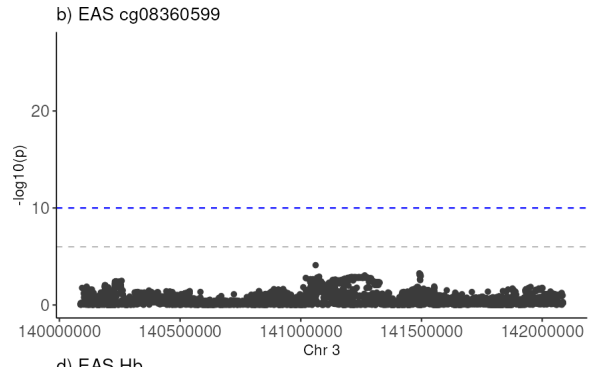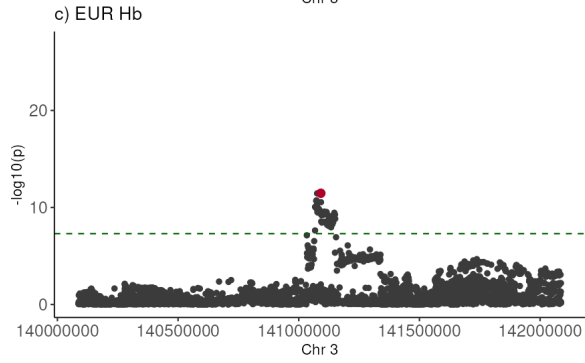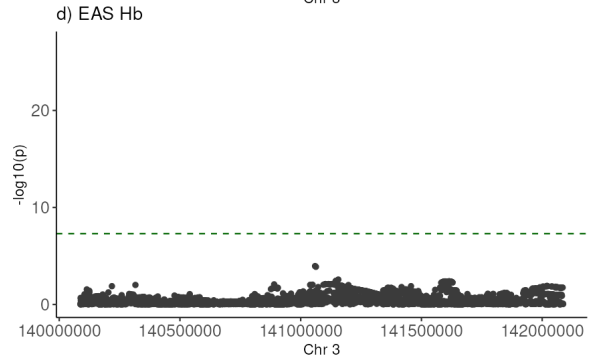

**Trait Hb: probe cg13029400**

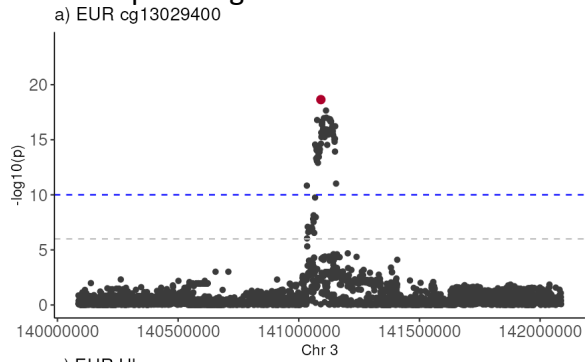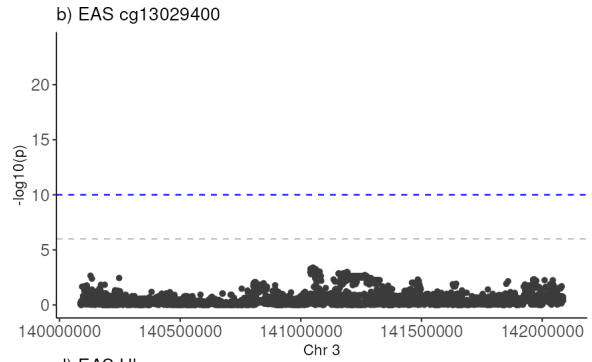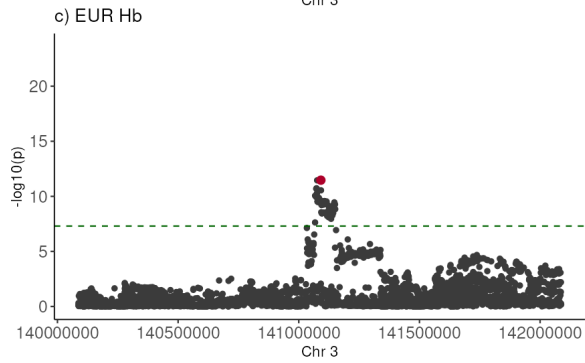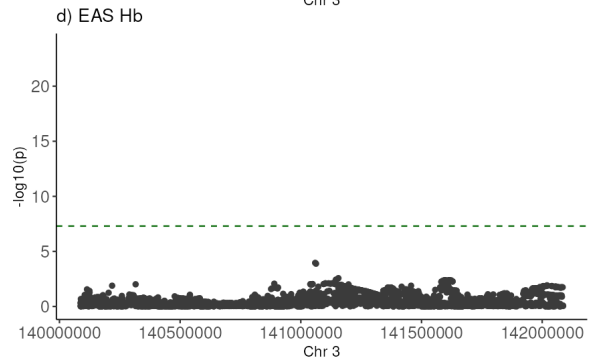

Trait Hb: probe cg13787933

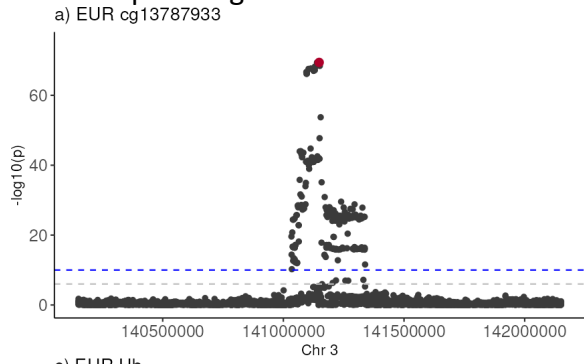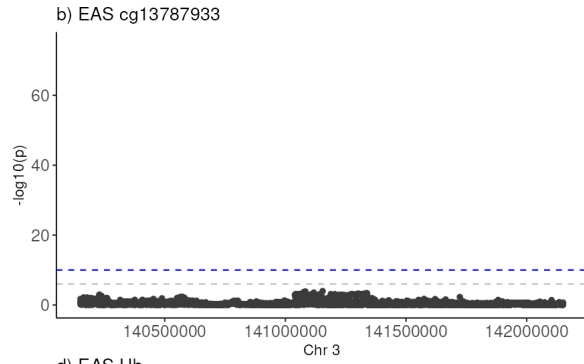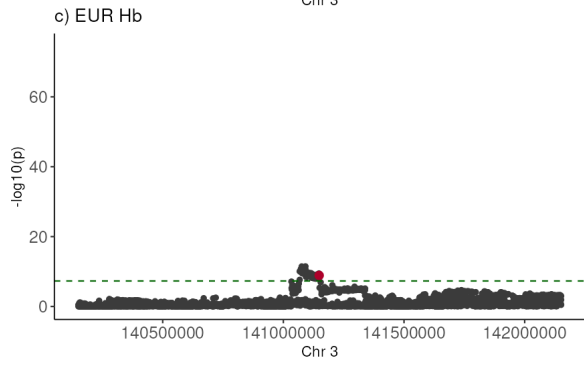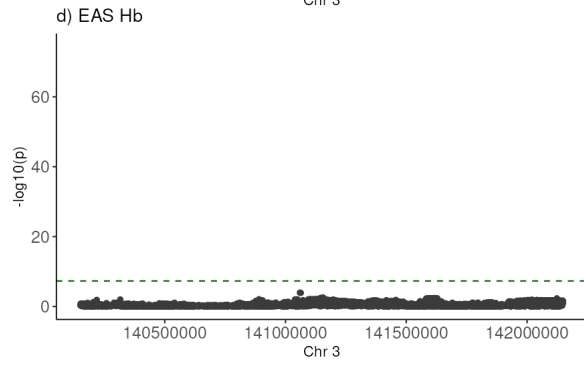

Trait Hb: probe cg21370924

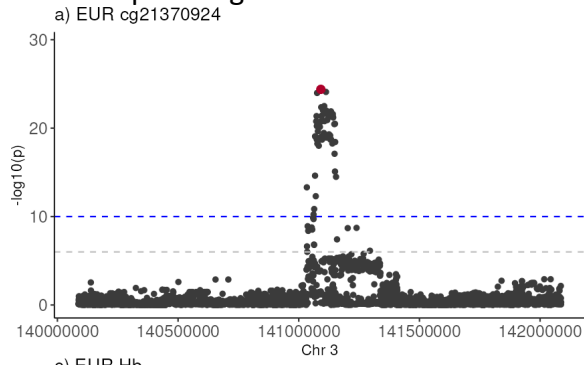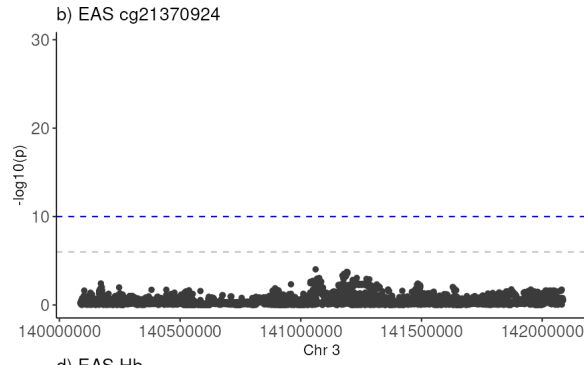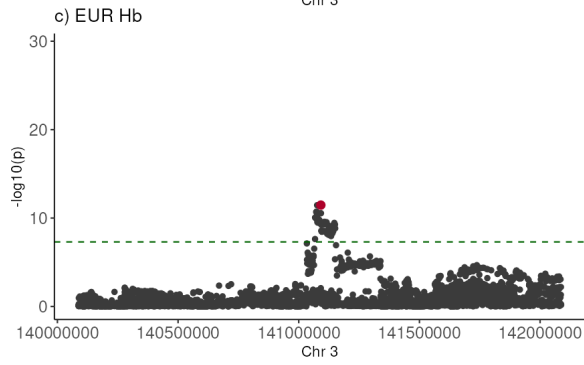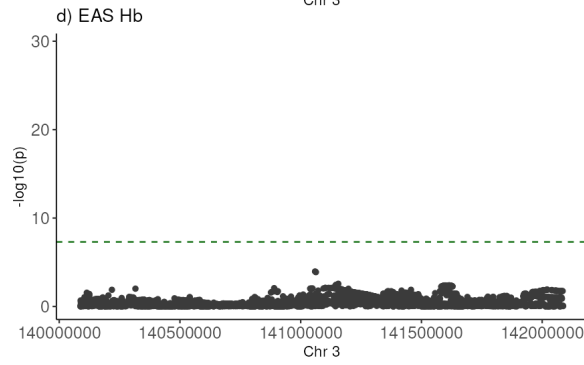

Trait Hb: probe cg07226470

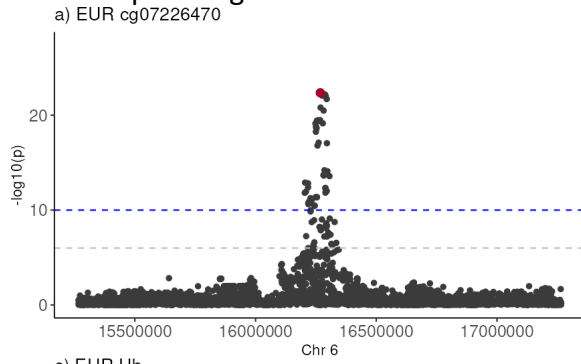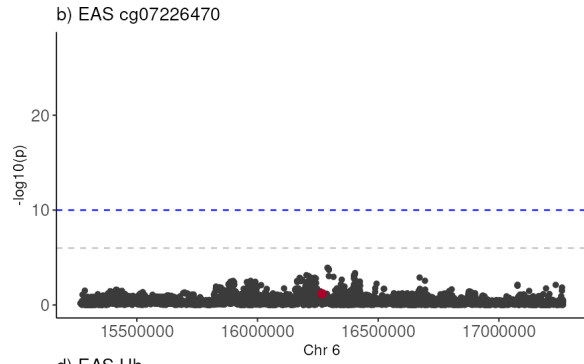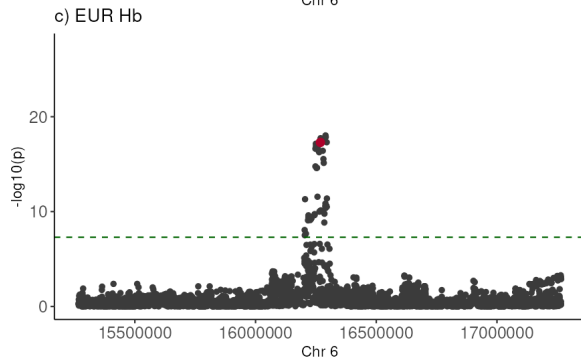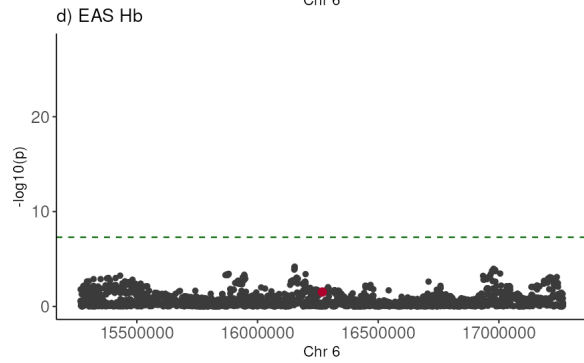

Trait Hb: probe cg21959090

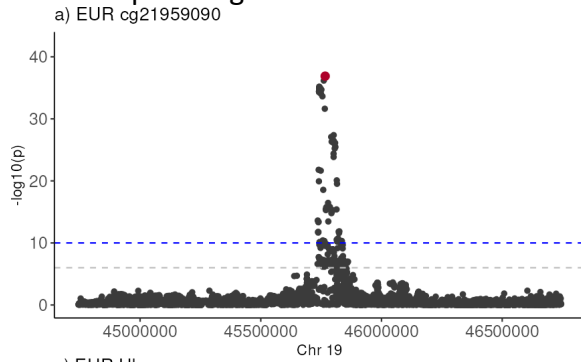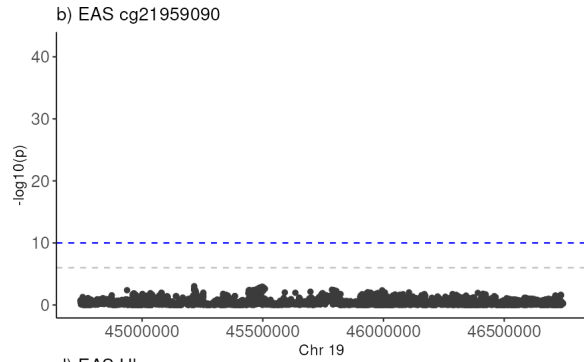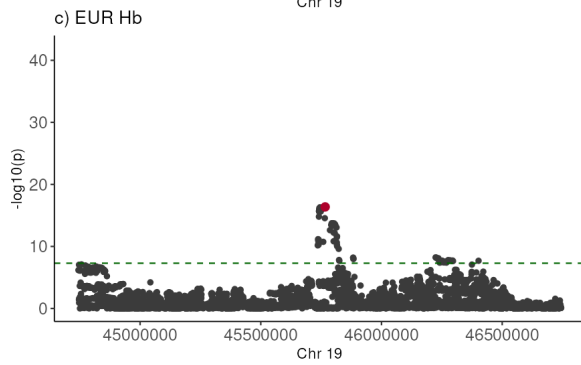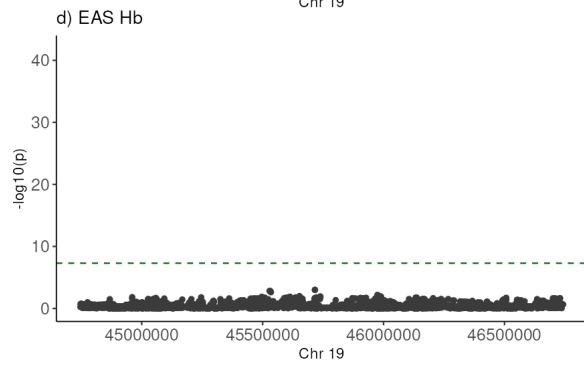

### Trait HbA1c: probe cg04781916

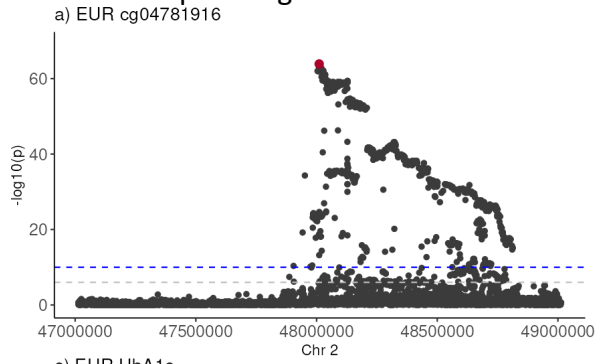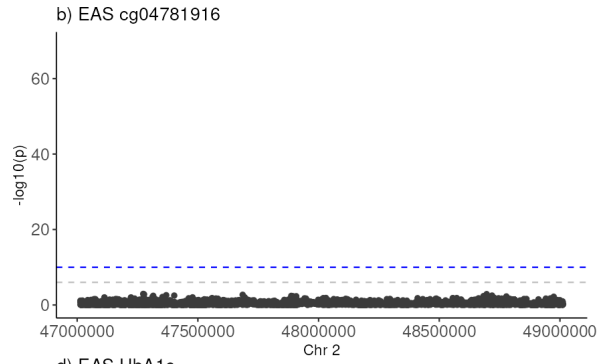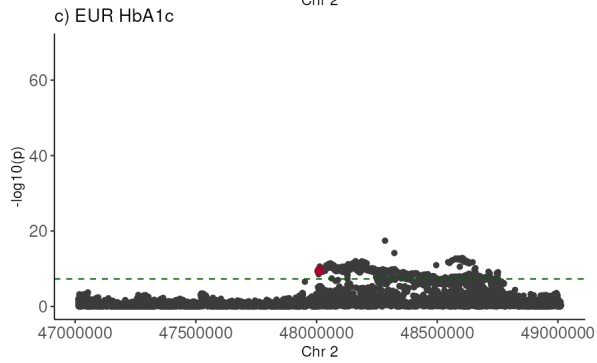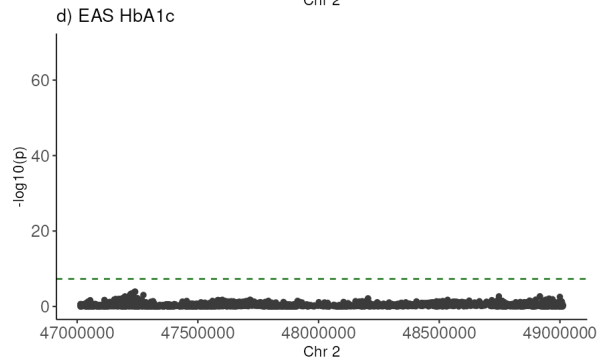

### Trait HbA1c: probe cg25173392

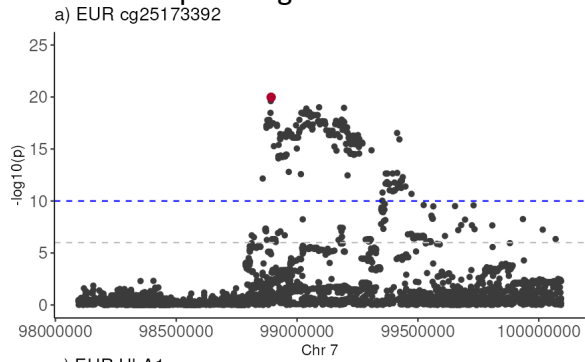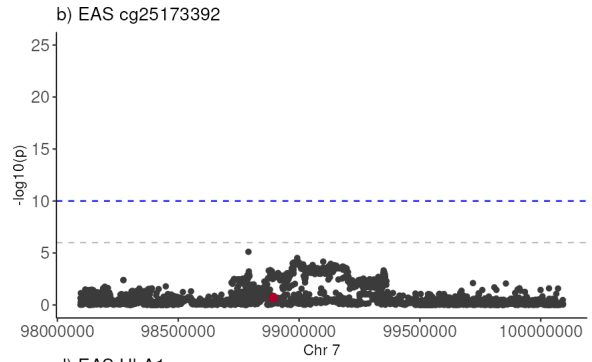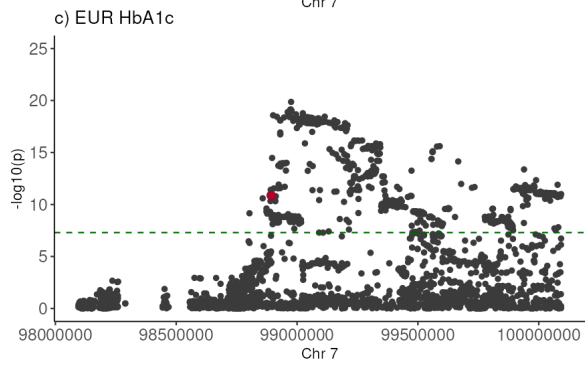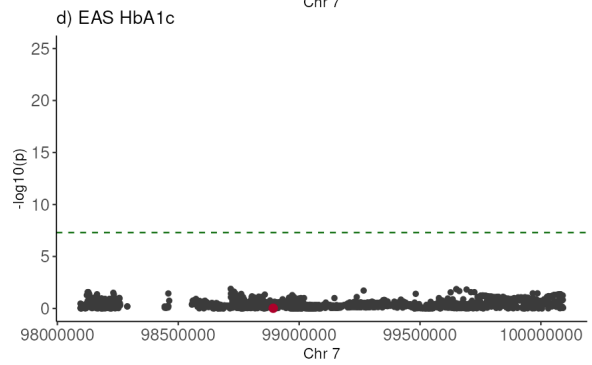

### Trait HbA1c: probe cg25721818

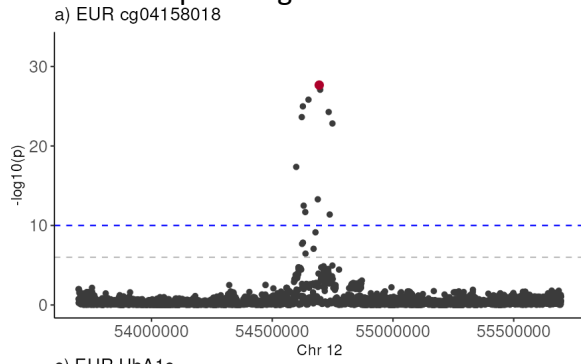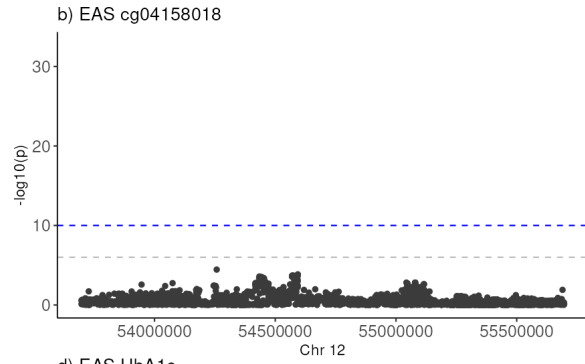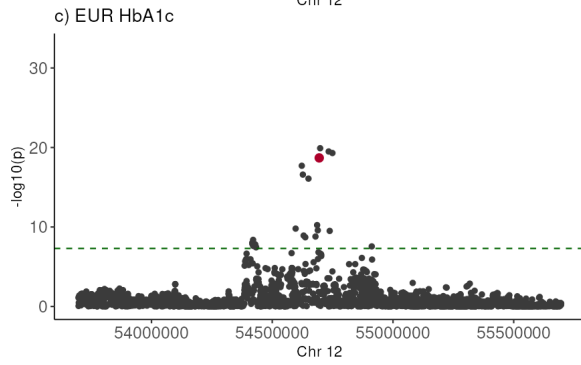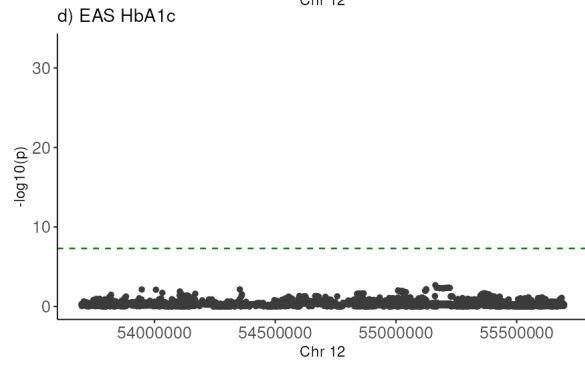

### Trait HbA1c: probe cg14872454

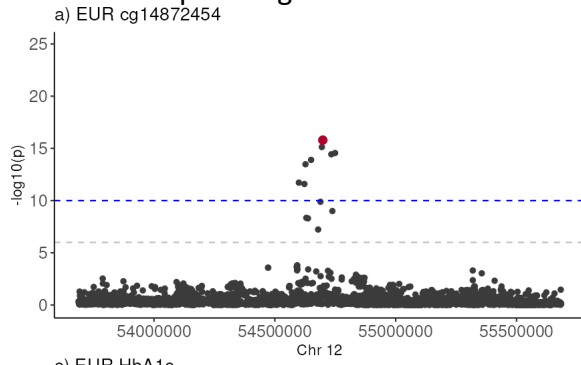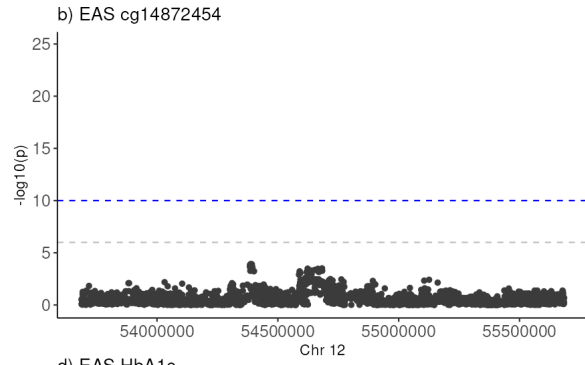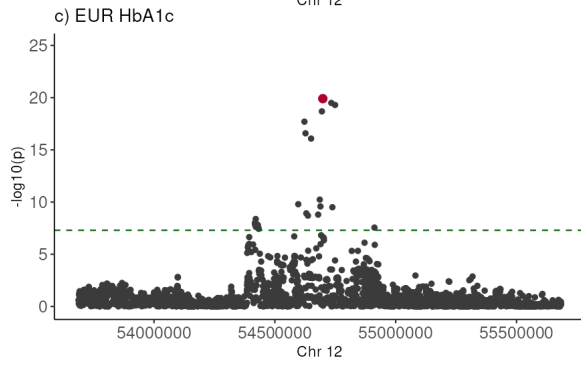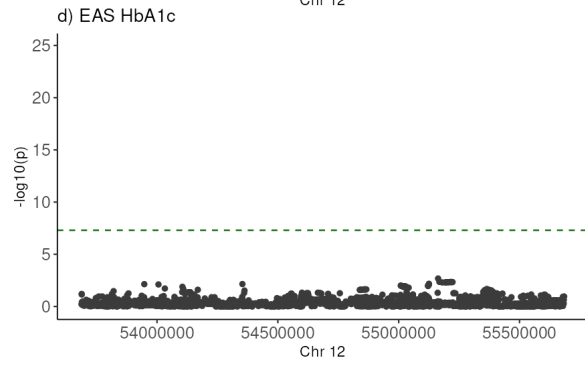

### Trait HbA1c: probe cg17230002

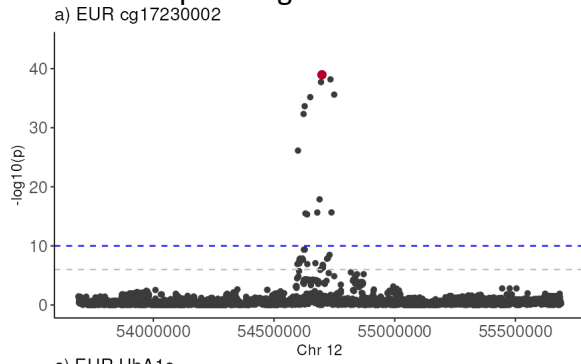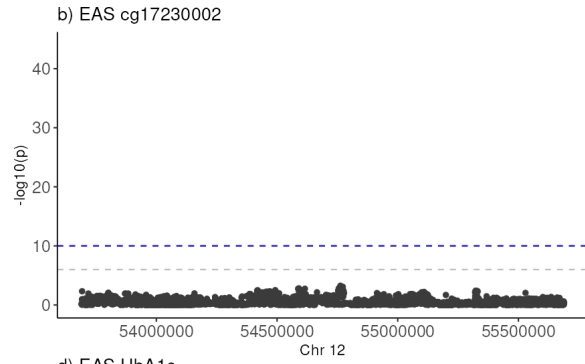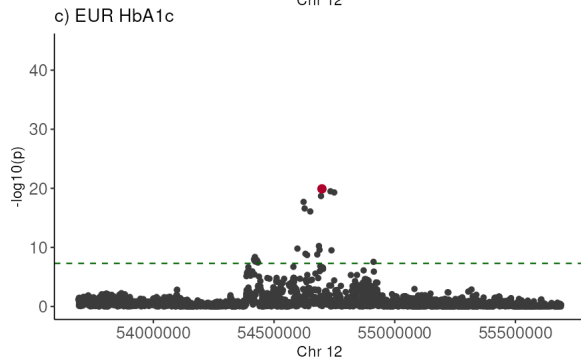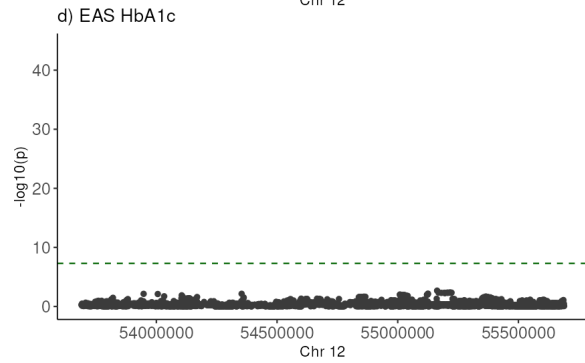

### Trait HbA1c: probe cg17869315

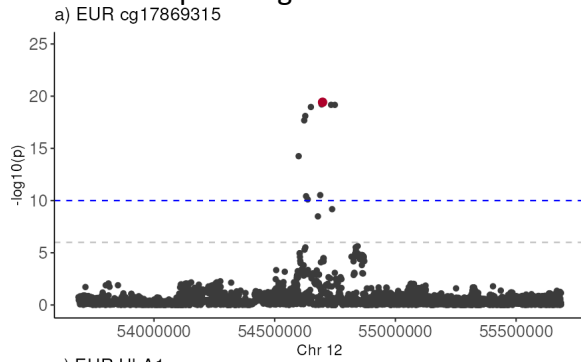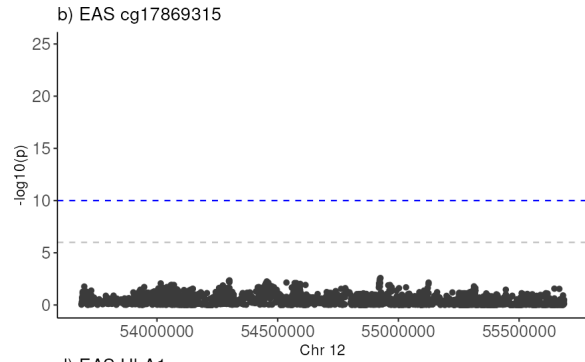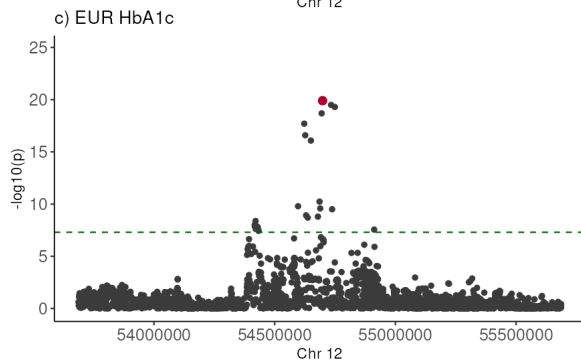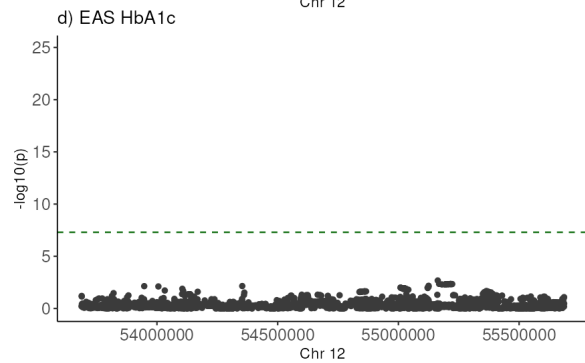



### Trait HbA1c: probe cg21376004

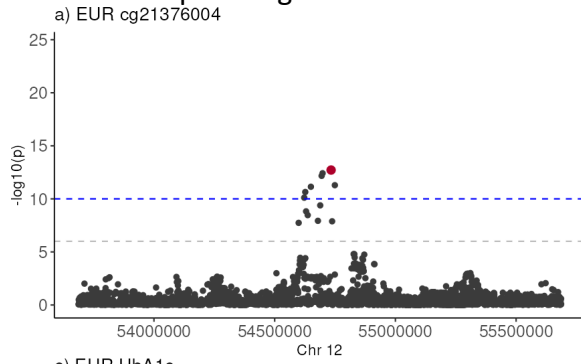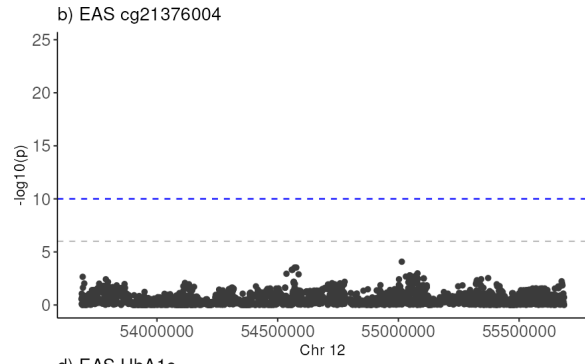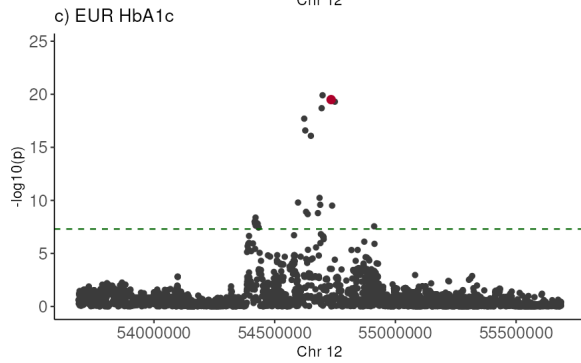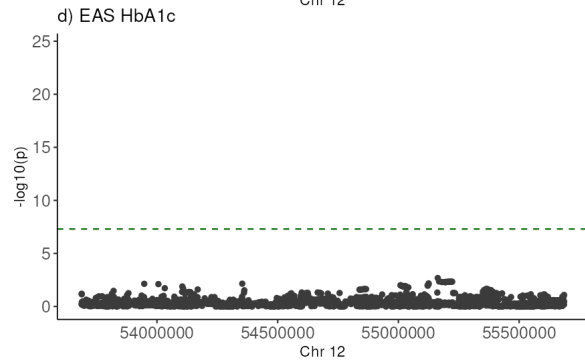

### Trait HbA1c: probe cg23140706

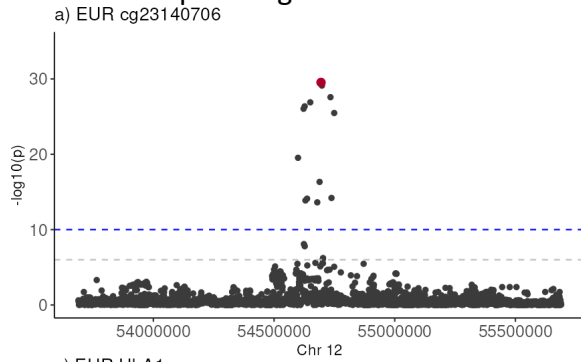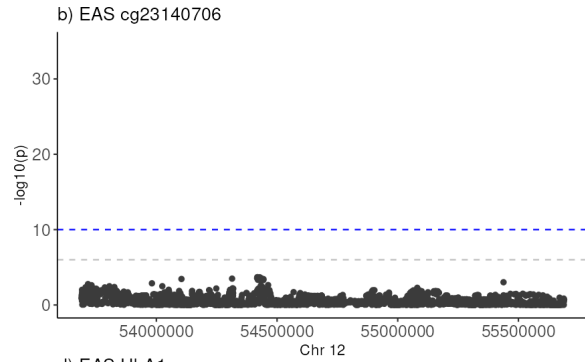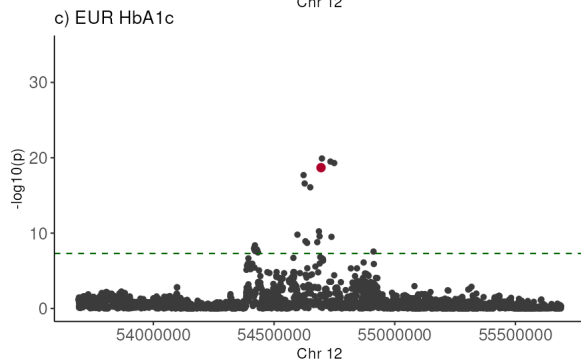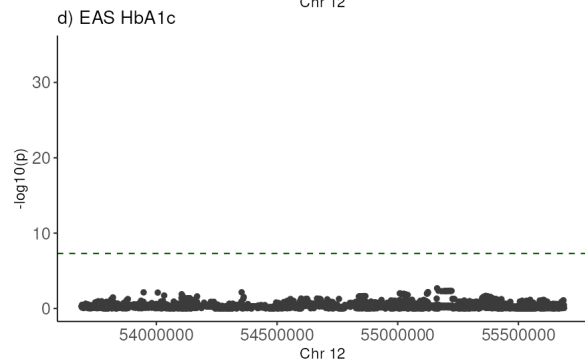

### Trait HbA1c: probe cg04158018

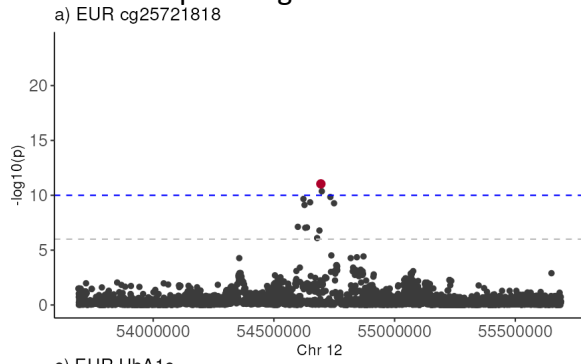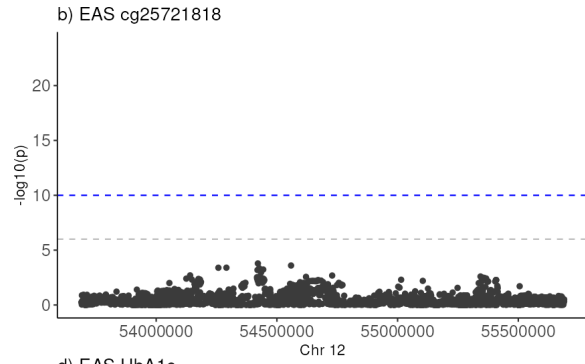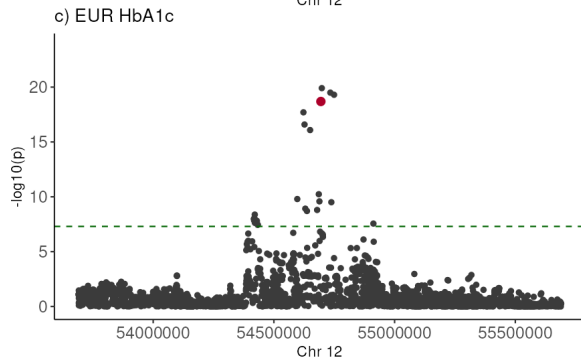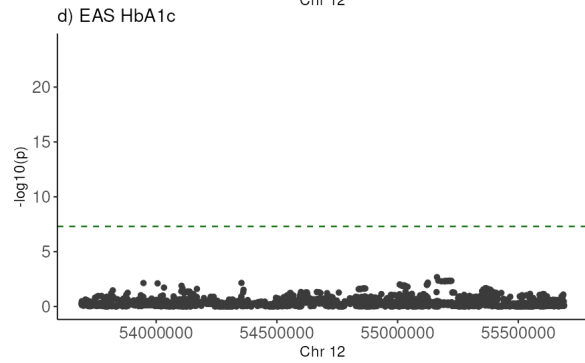

### Trait HD: probe cg11258943

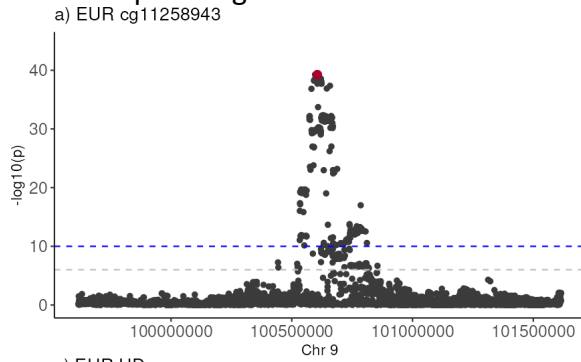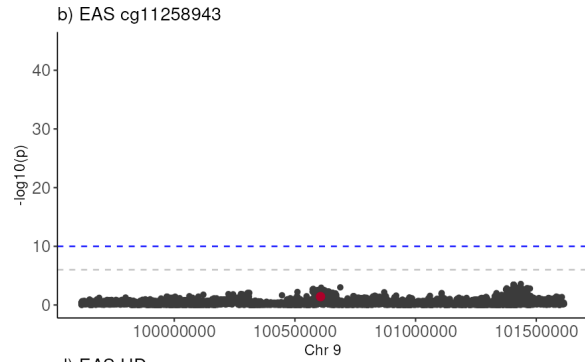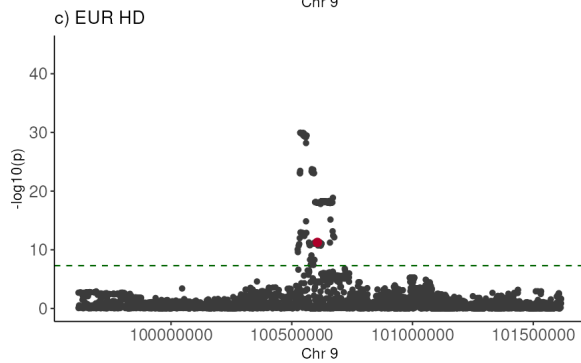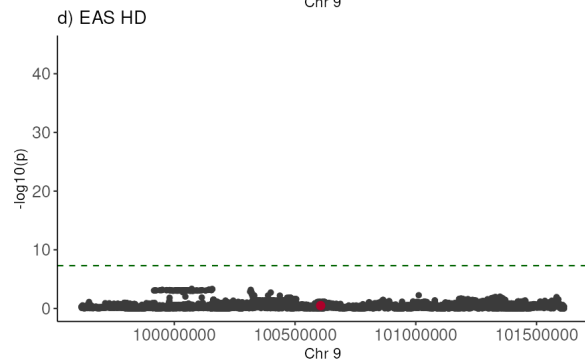

Trait HD: probe cg13827859

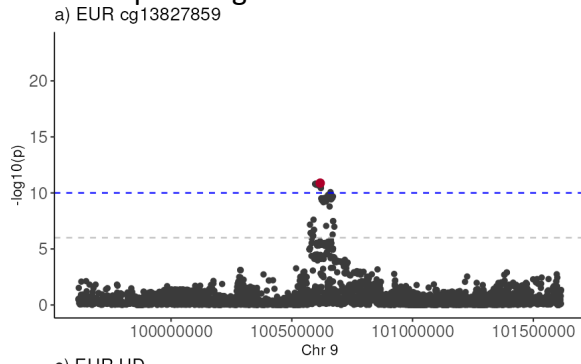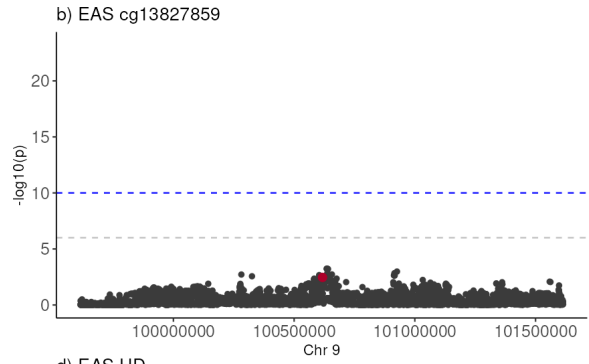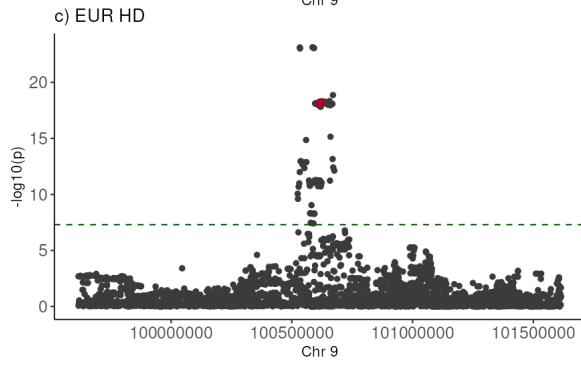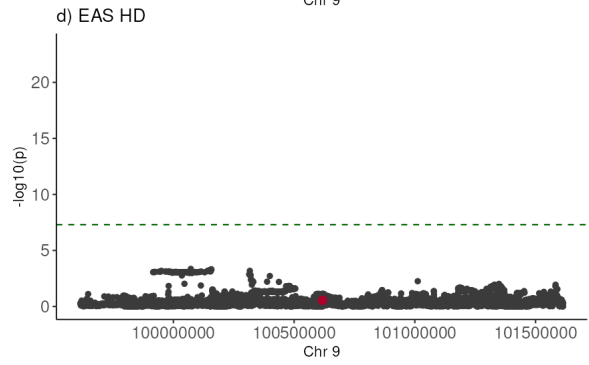

Trait HD: probe cg10458080

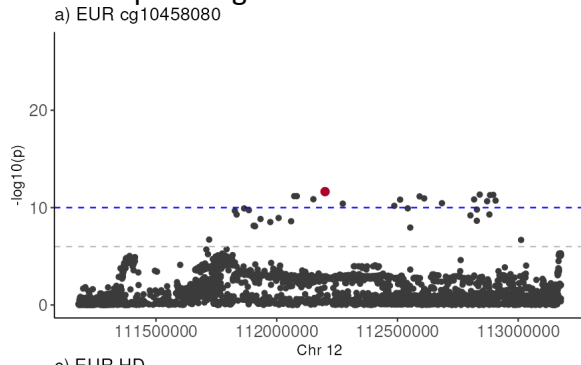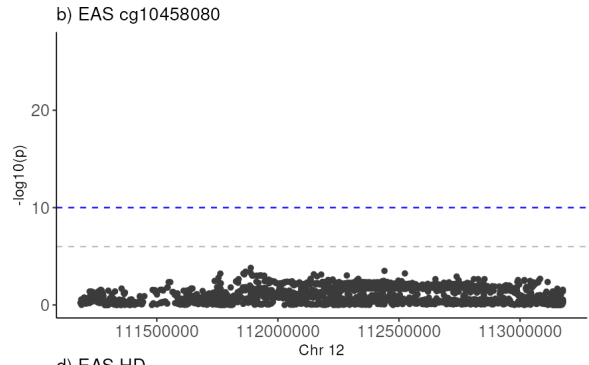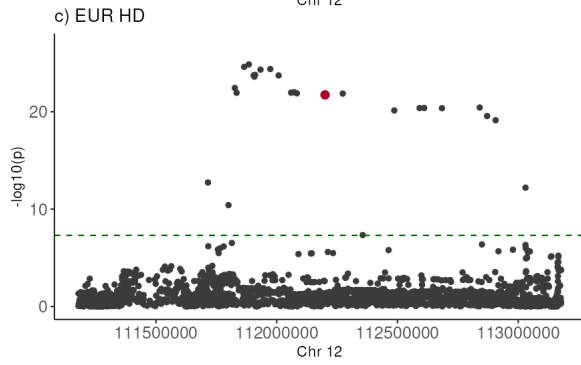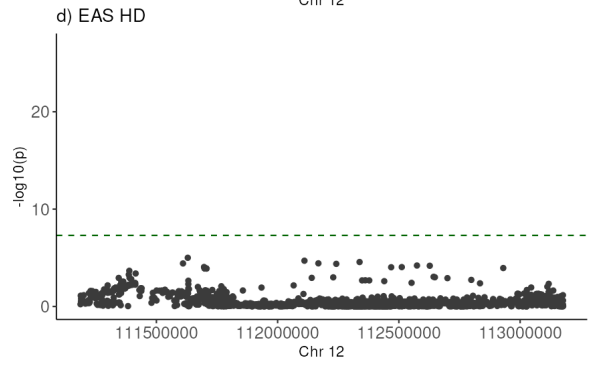

Trait Ht: probe cg04996089

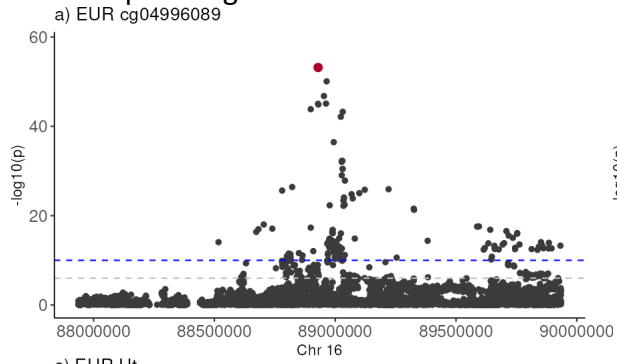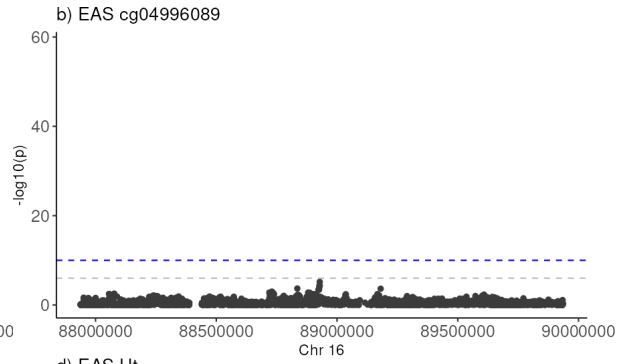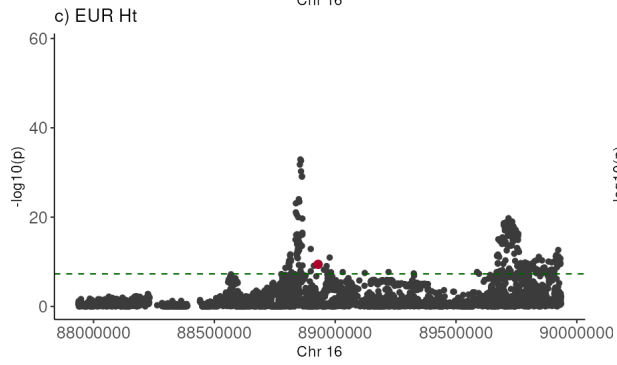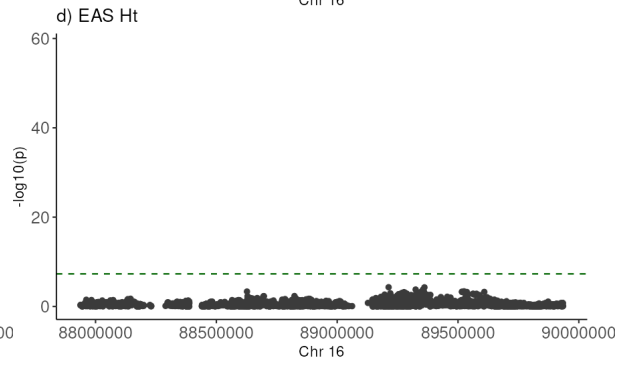

Trait Ht: probe cg07716131

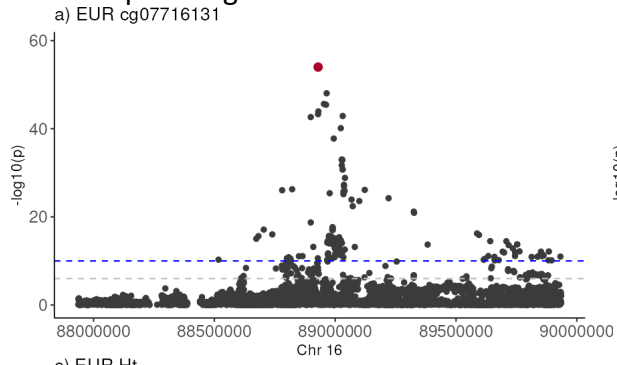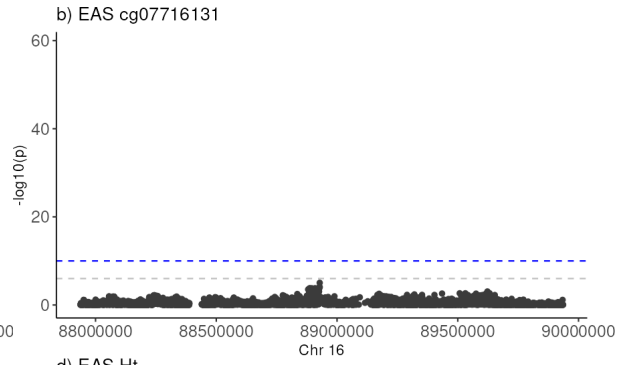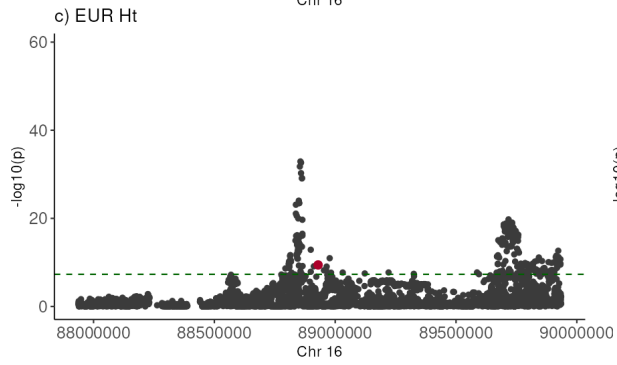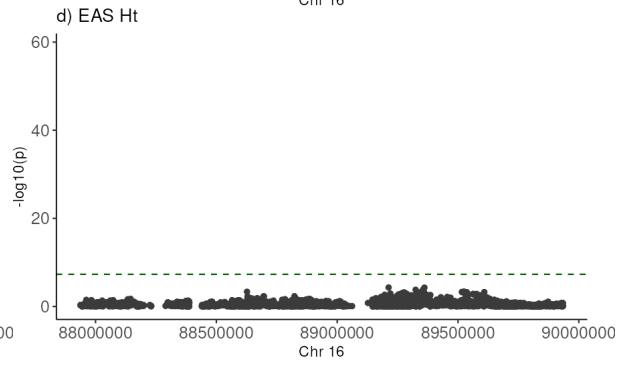

Trait Ht: probe cg08144157

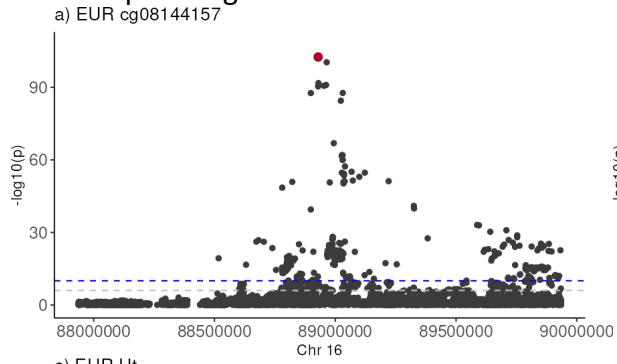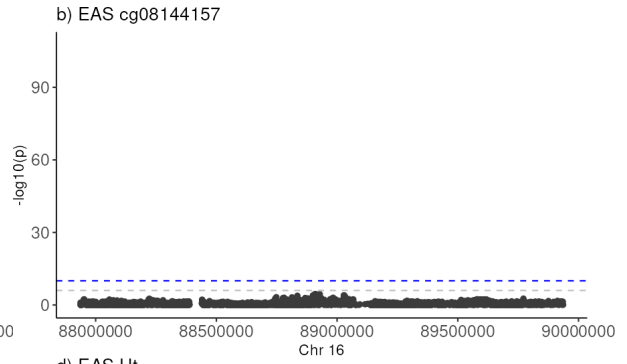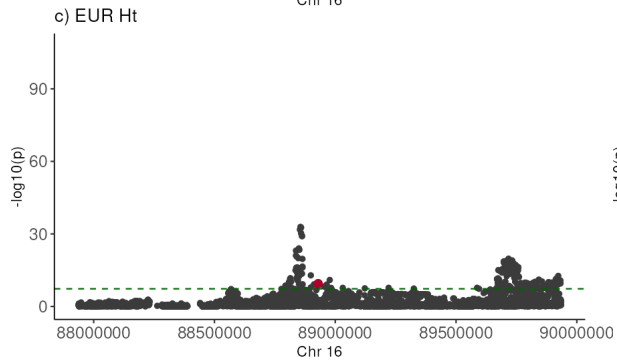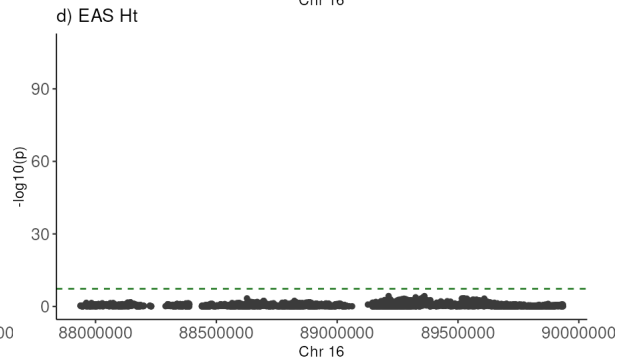

Trait Ht: probe cg09493966

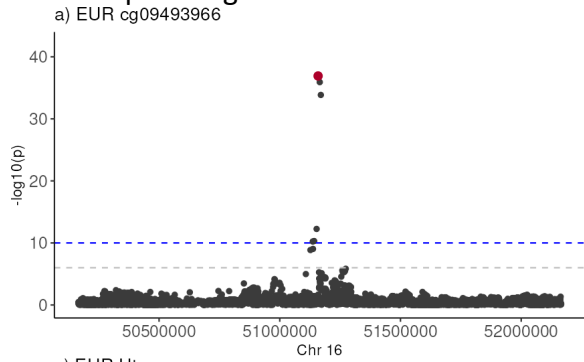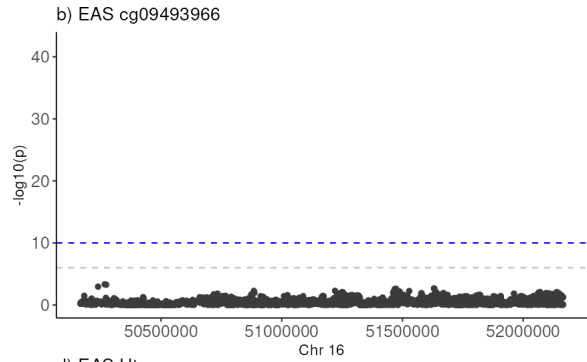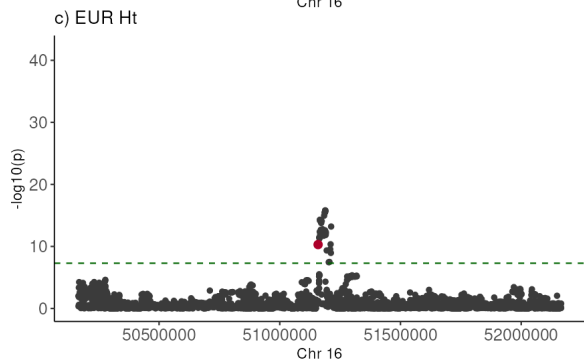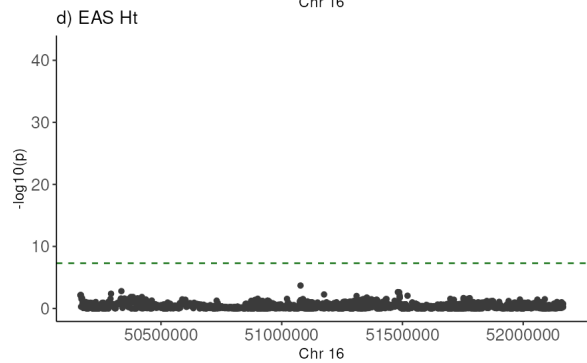

Trait Ht: probe cg22728782

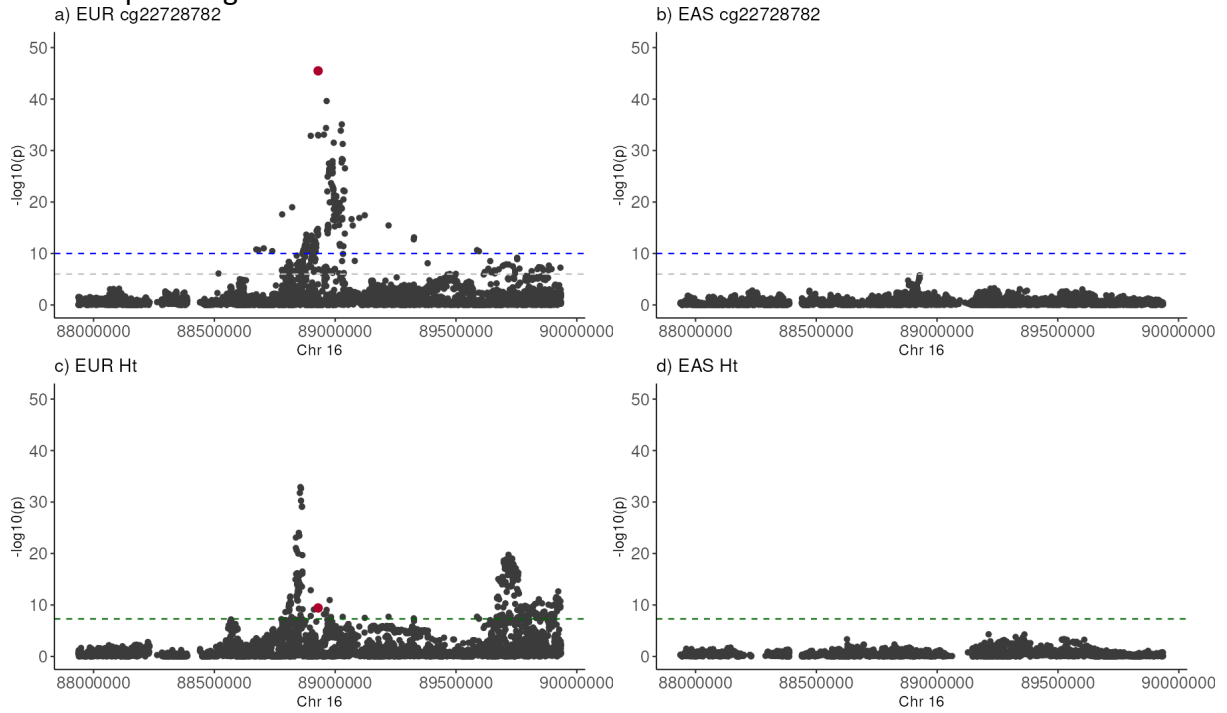

Trait Ht: probe cg27483694

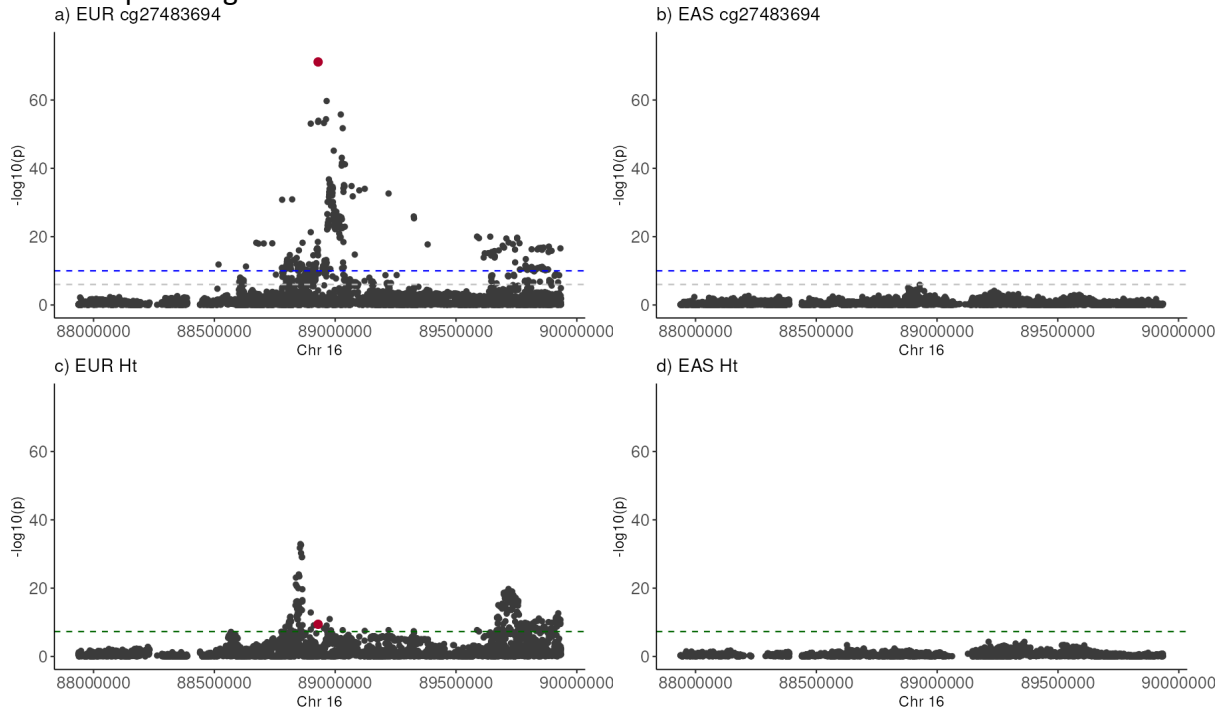

Trait Ht: probe cg21959090

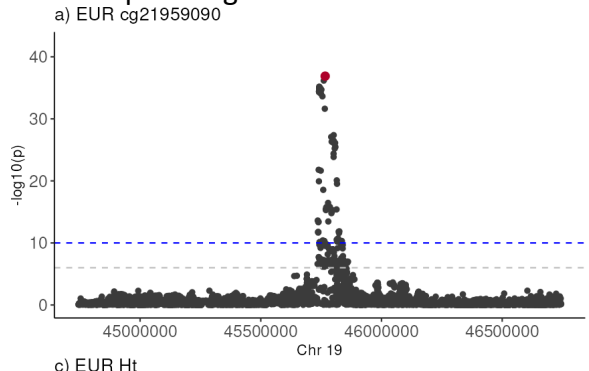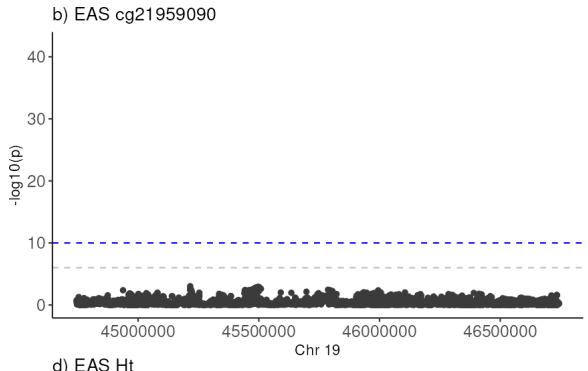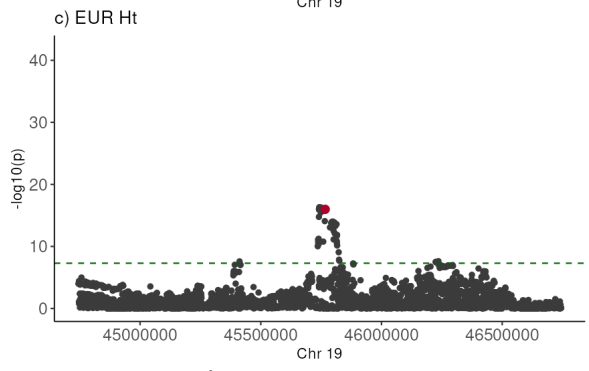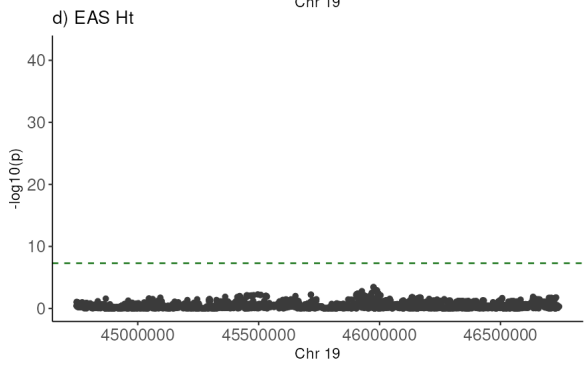

Trait Hypo: probe cg25204543

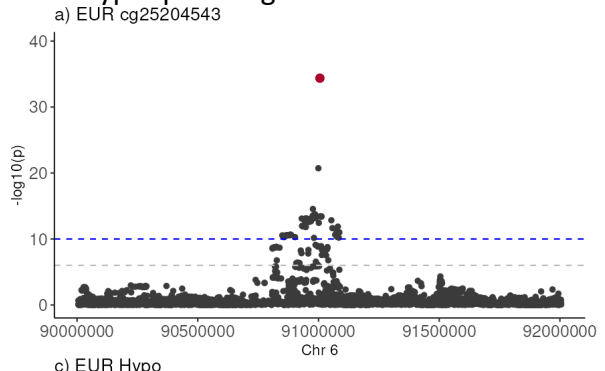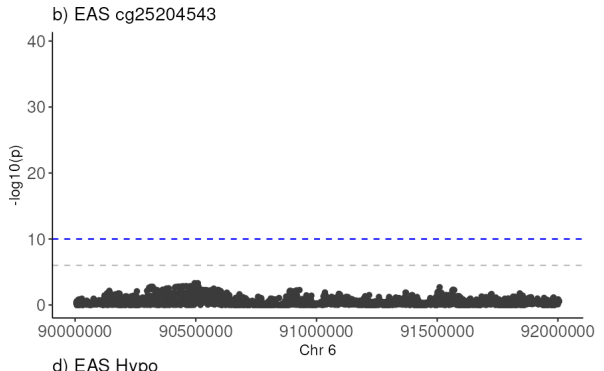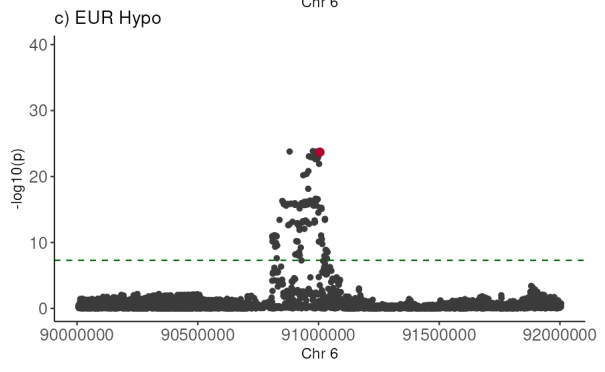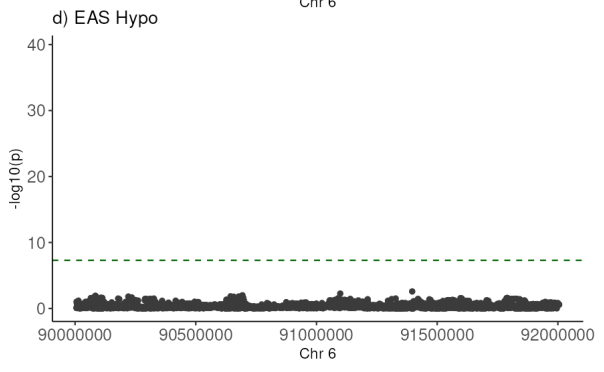

### Trait Hypo: probe cg10568624

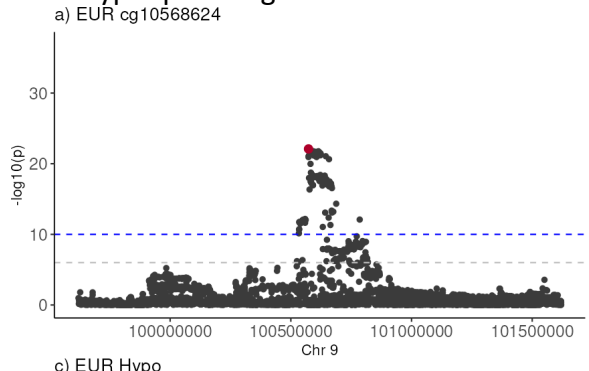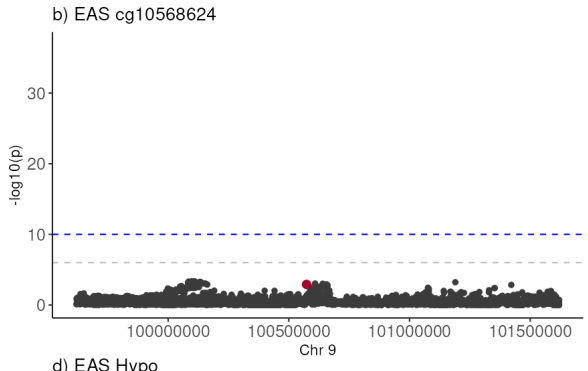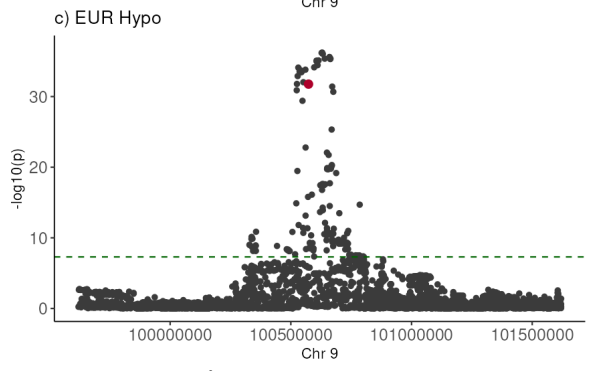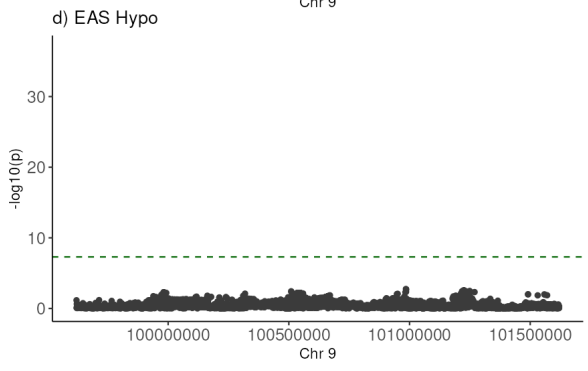

### Trait Hypo: probe cg00507154

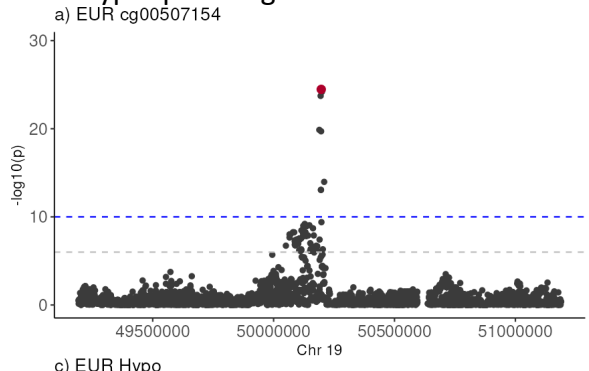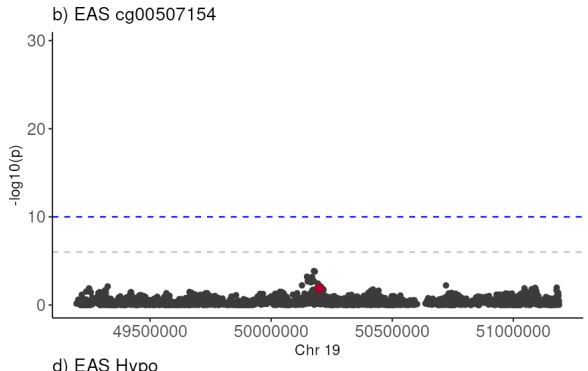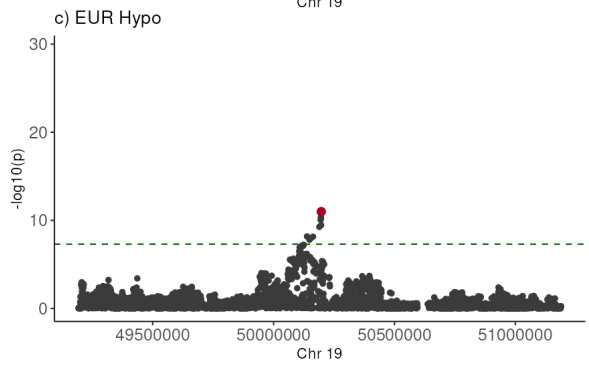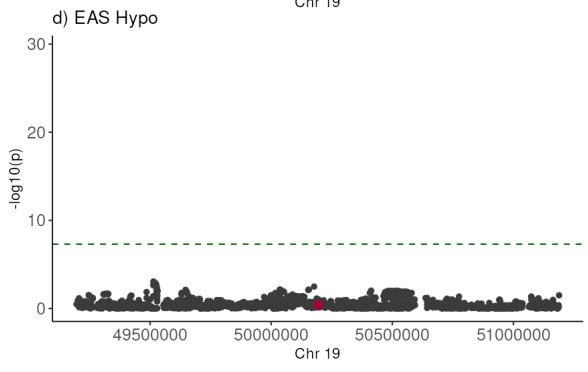



Trait IN: probe cg12351042

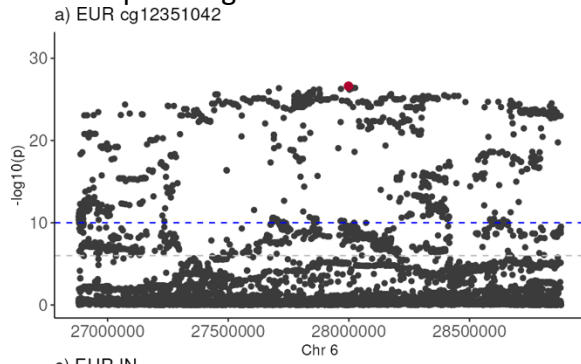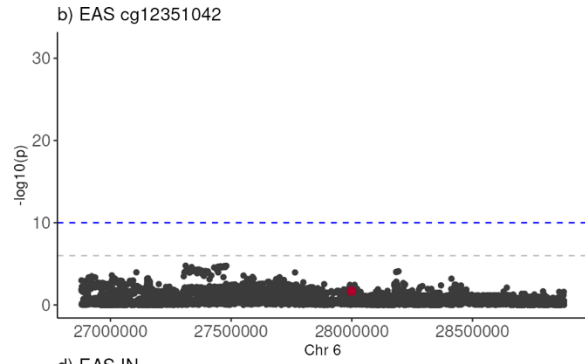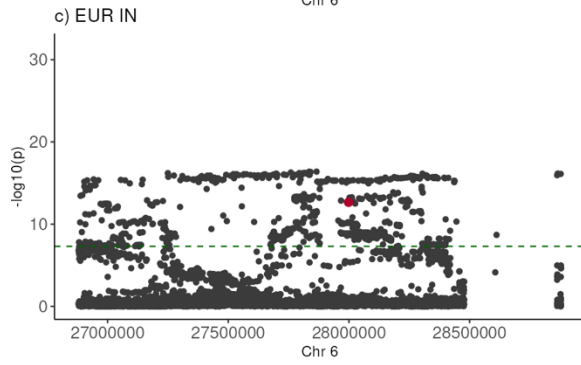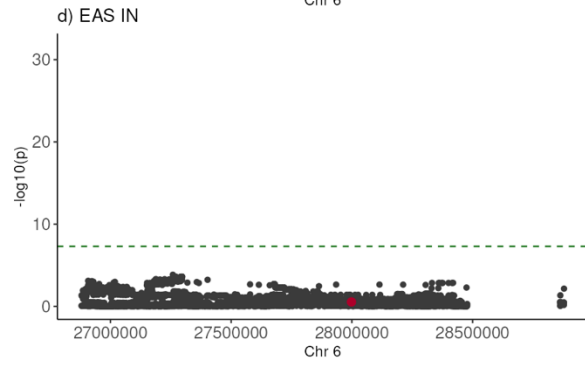

Trait IN: probe cg19084075

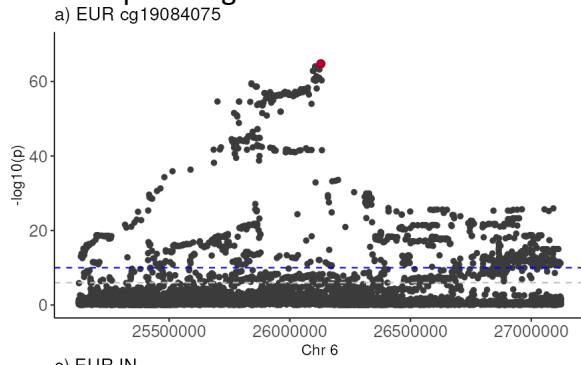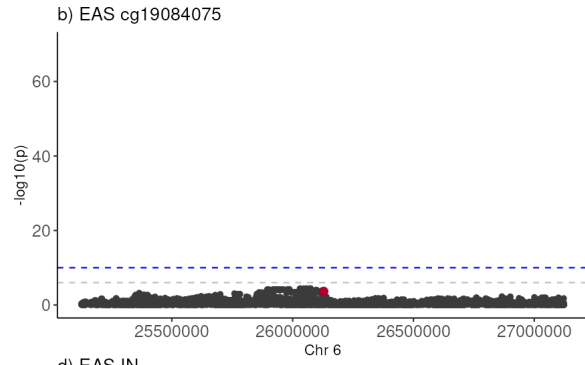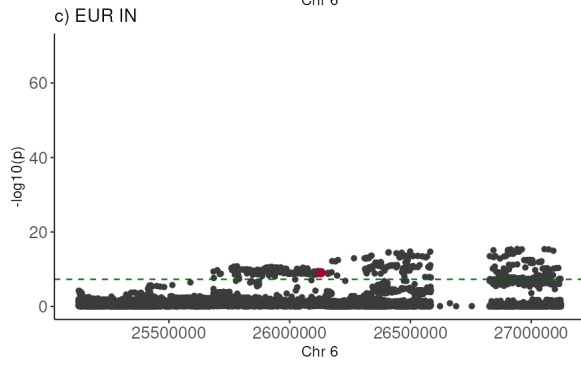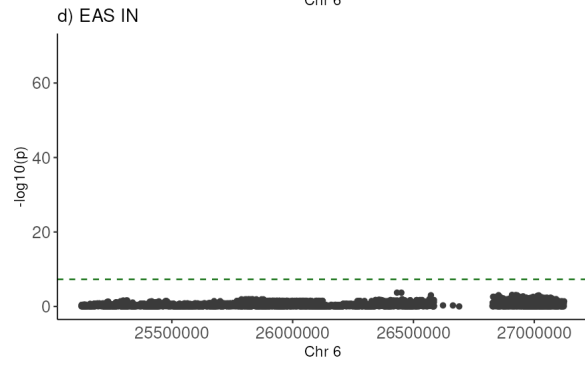

### Trait LuC: probe cg13714459

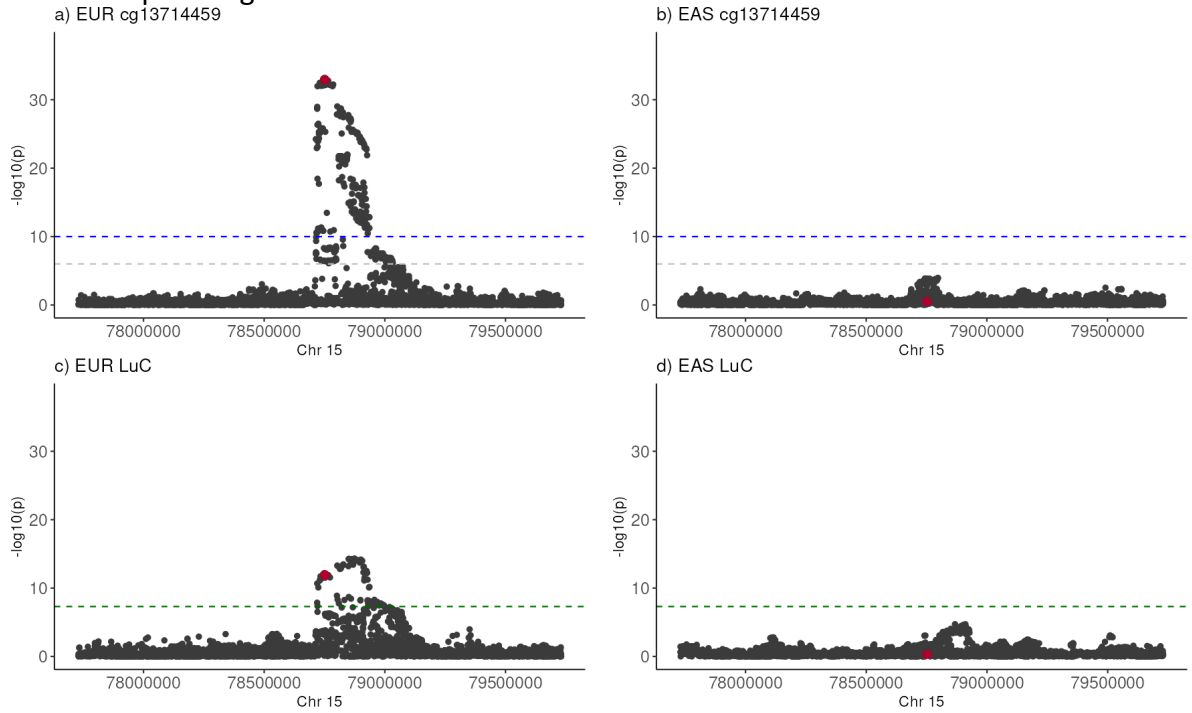

### Trait Lym: probe cg20660171

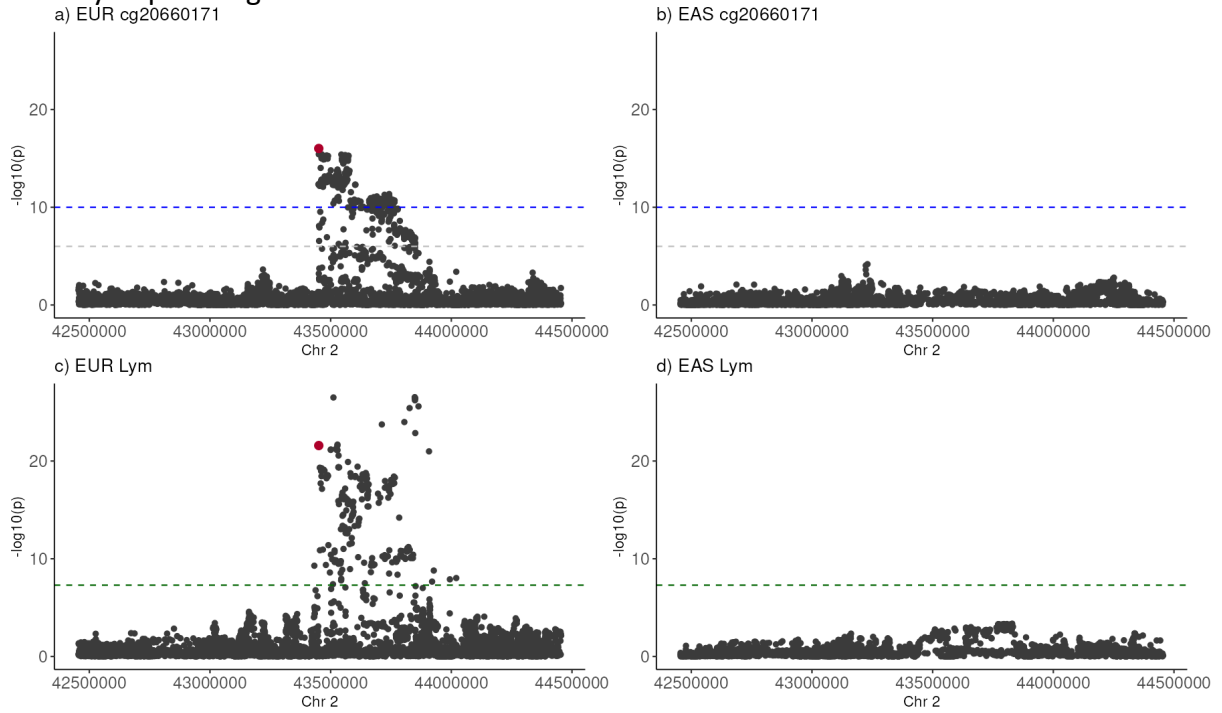

Trait Lym: probe cg21748751

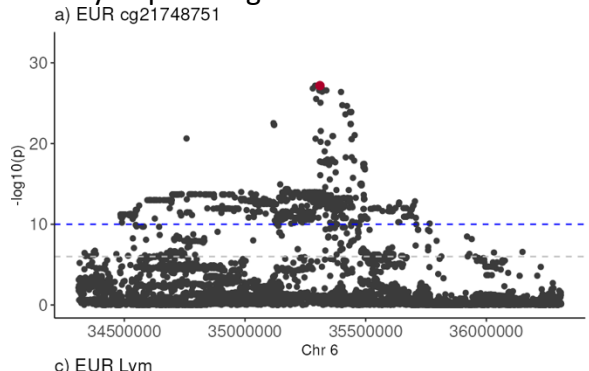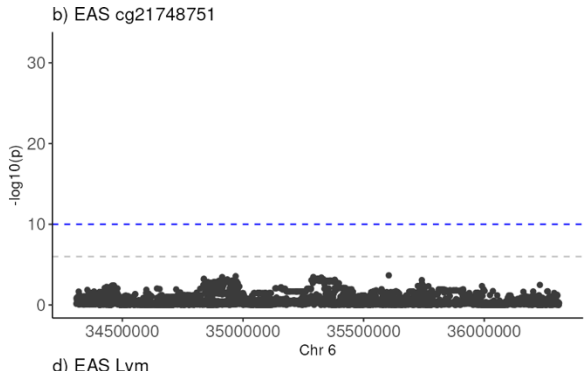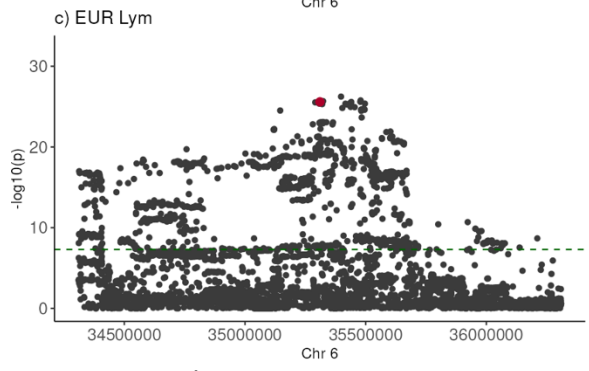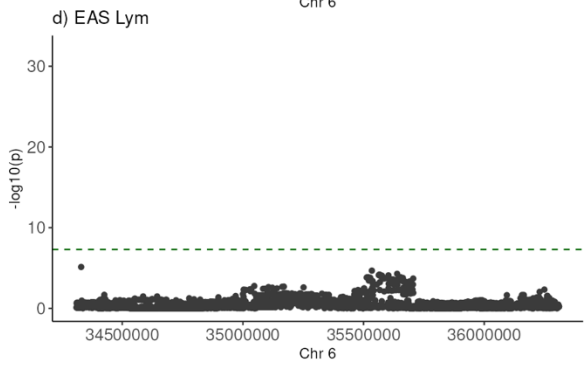

Trait Lym: probe cg25204543

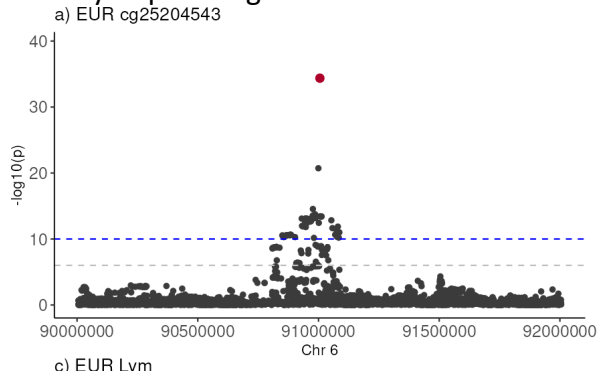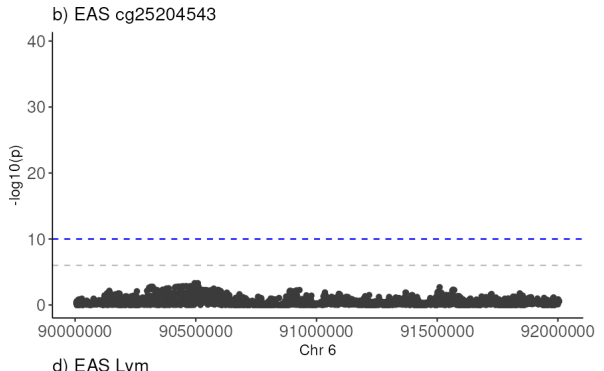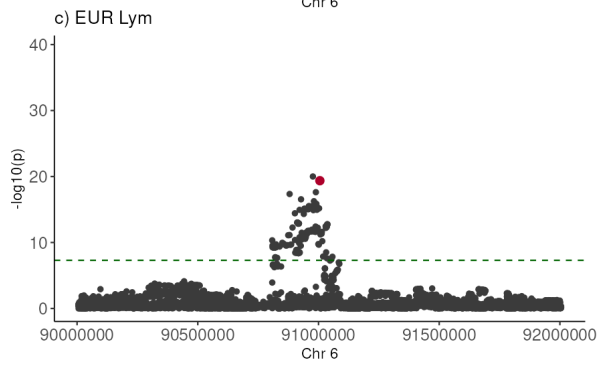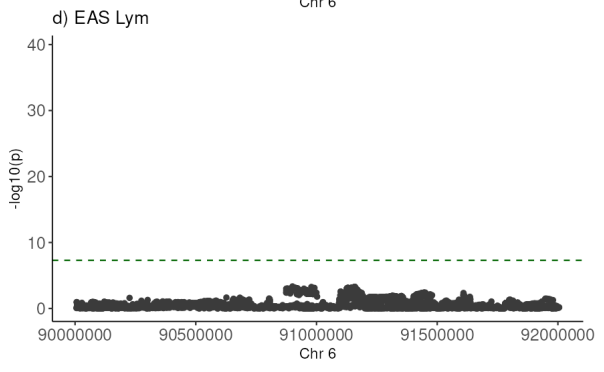

Trait MCV: probe cg13719746

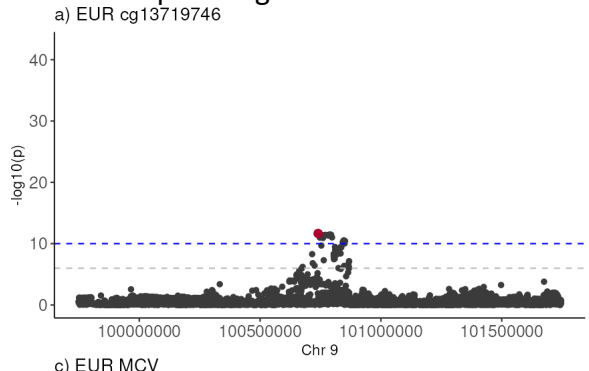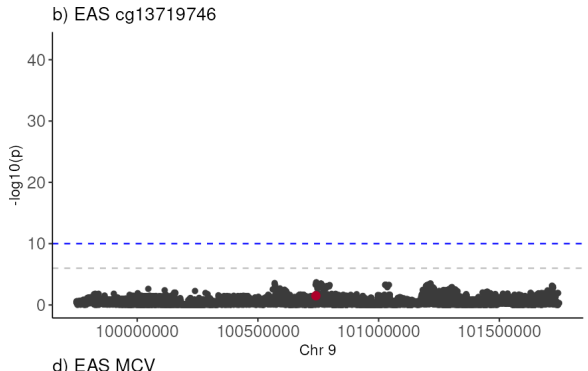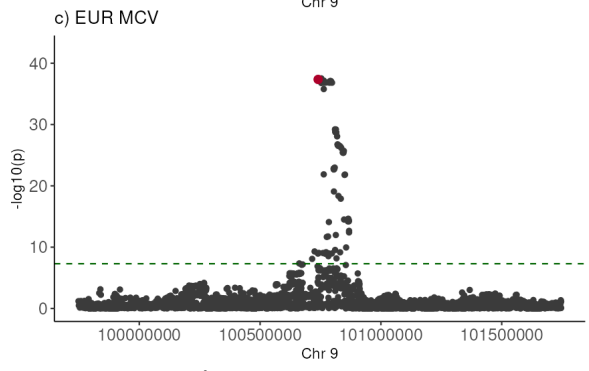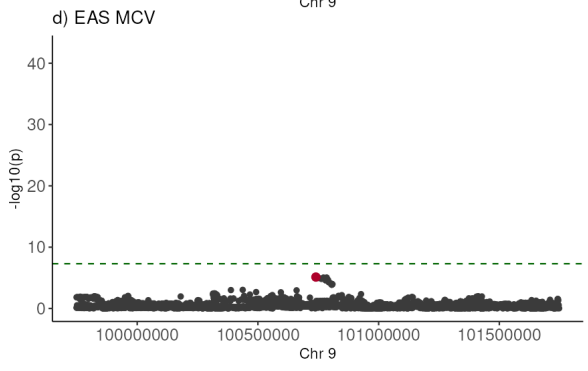

Trait MCV: probe cg07809909

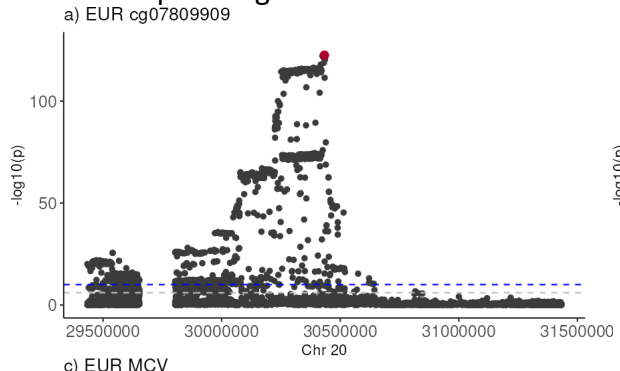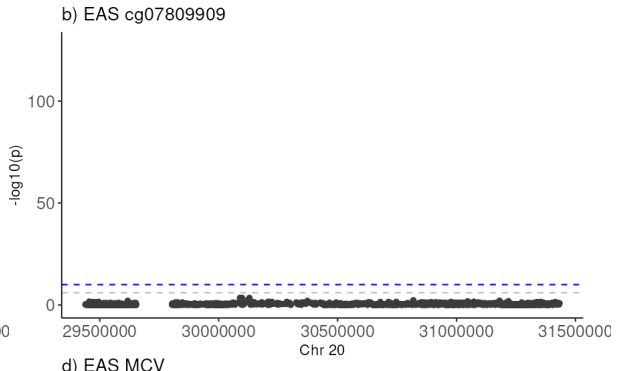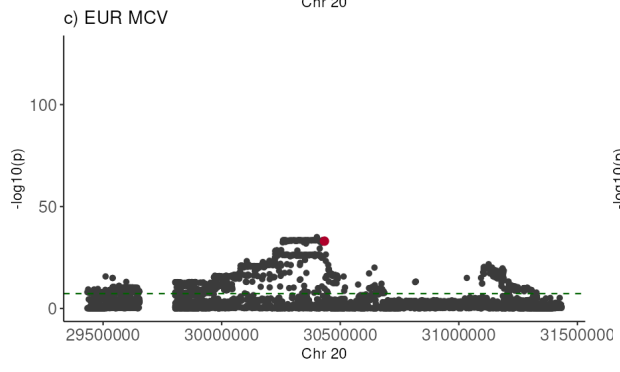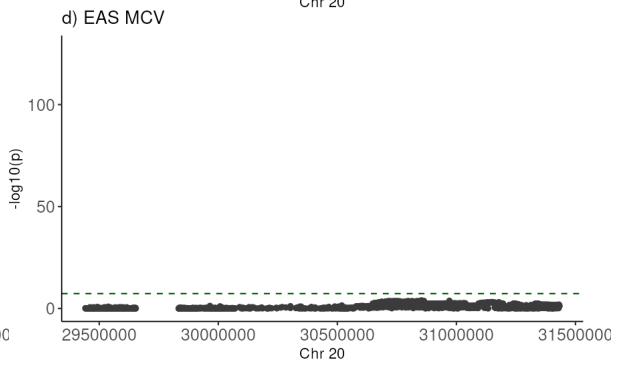

### Trait MCV: probe cg11815991

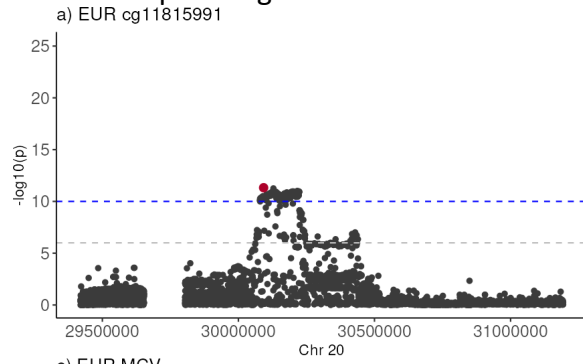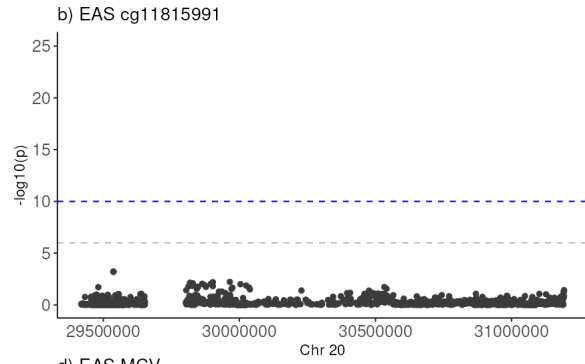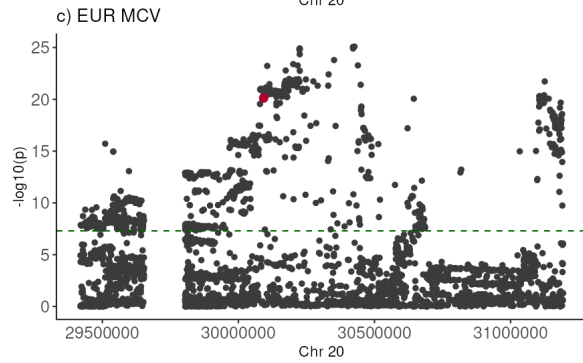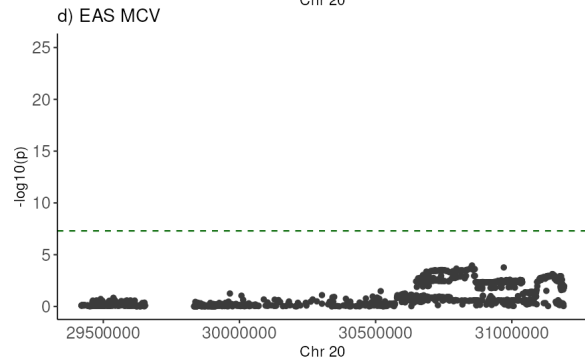

### Trait MCV: probe cg12033622

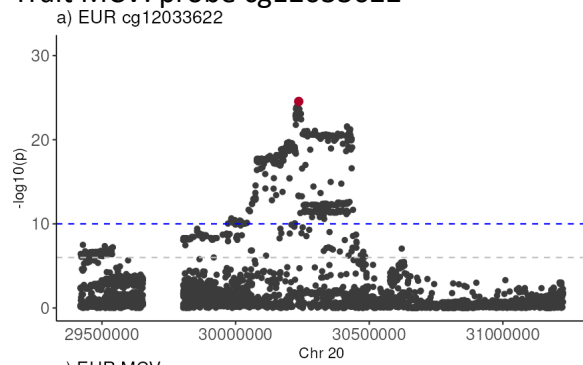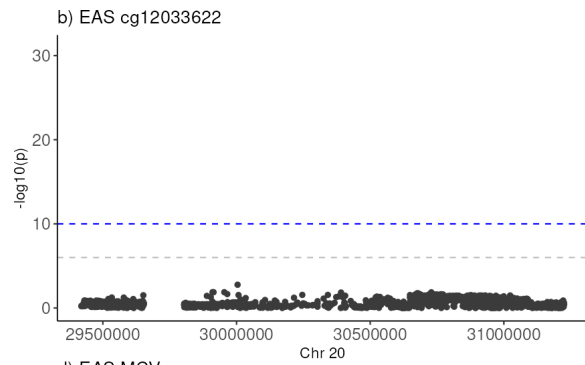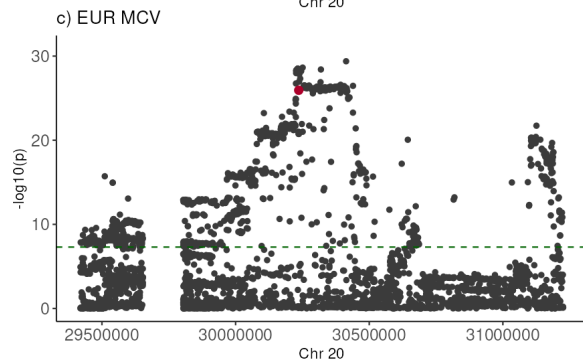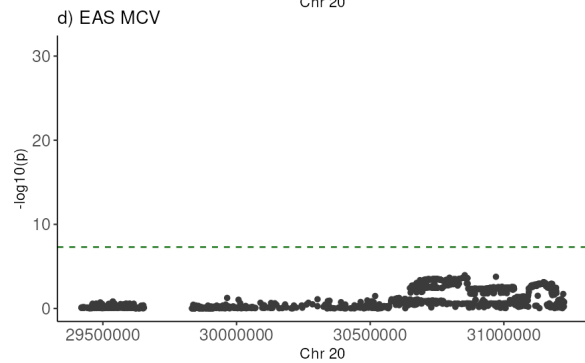

### Trait MCV: probe cg26070540

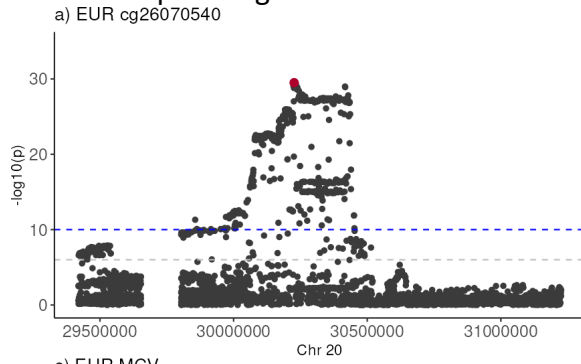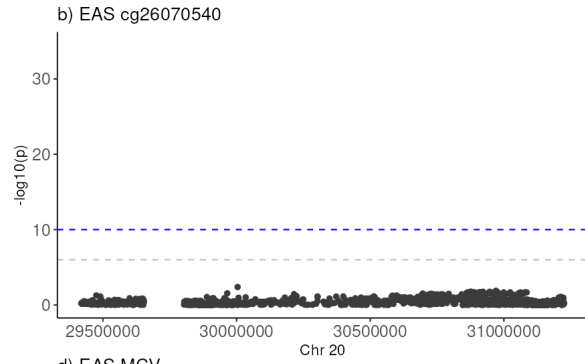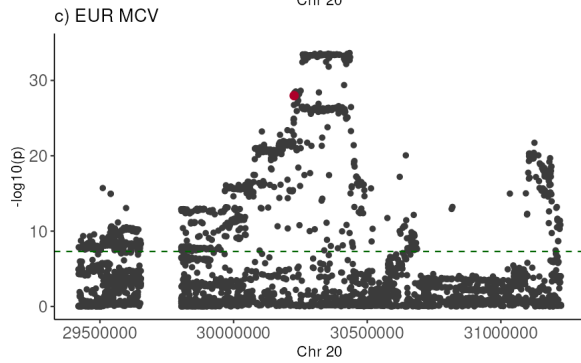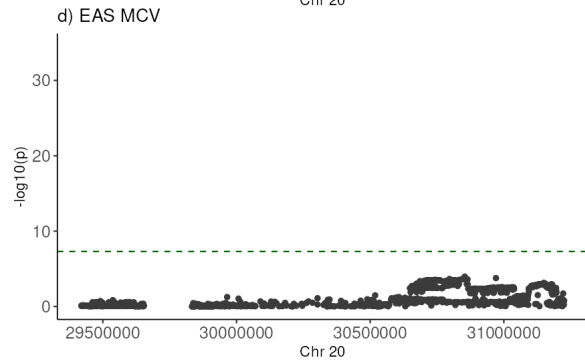

### Trait MCV: probe cg01109867

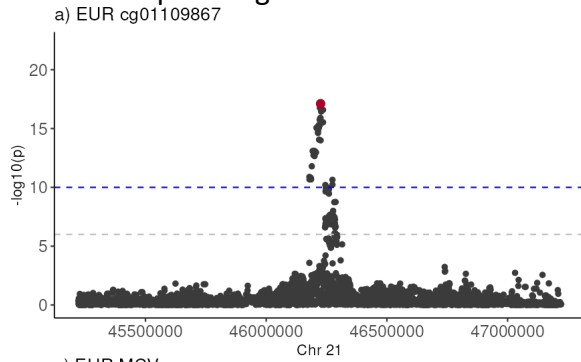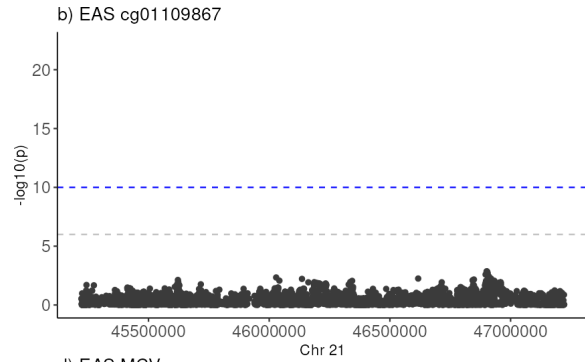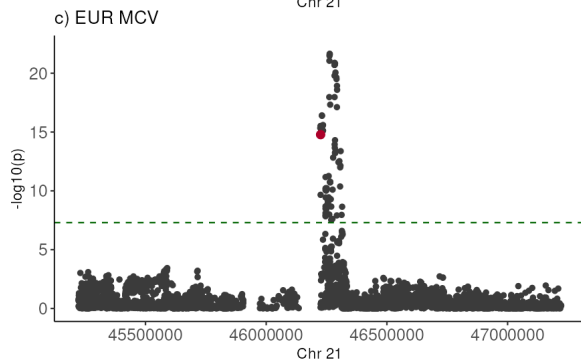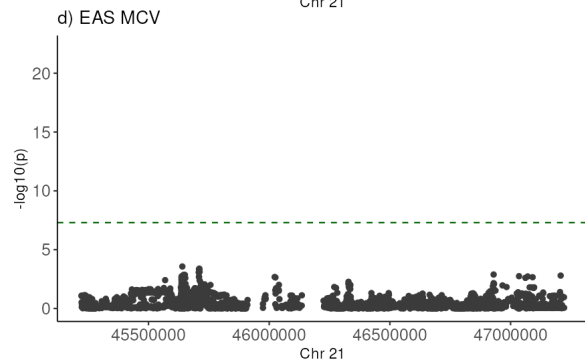

### Trait ML: probe cg04387059

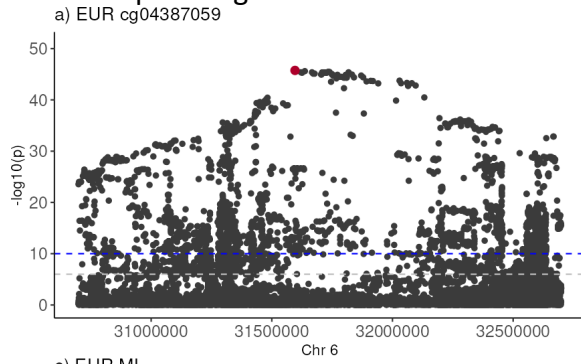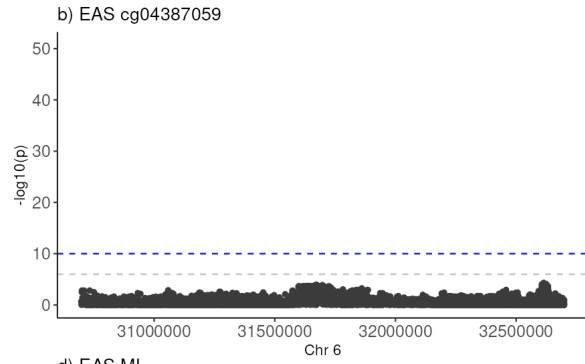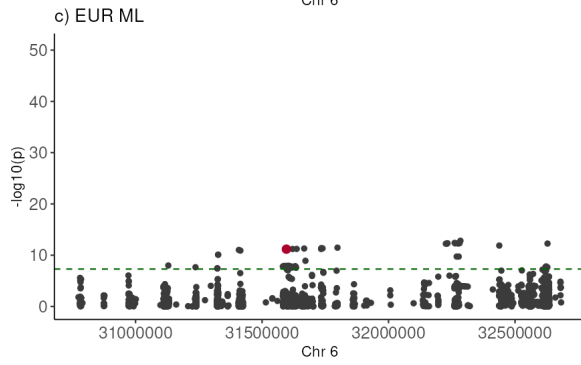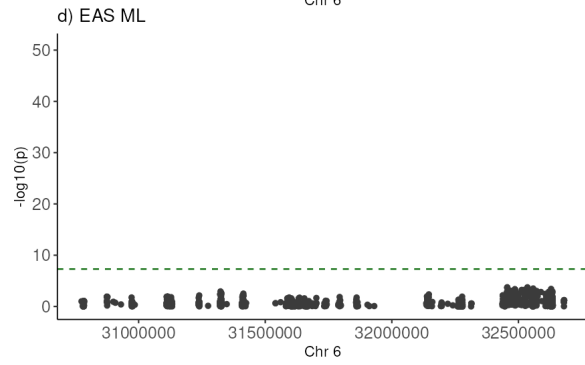

### Trait N02BE: probe cg04387059

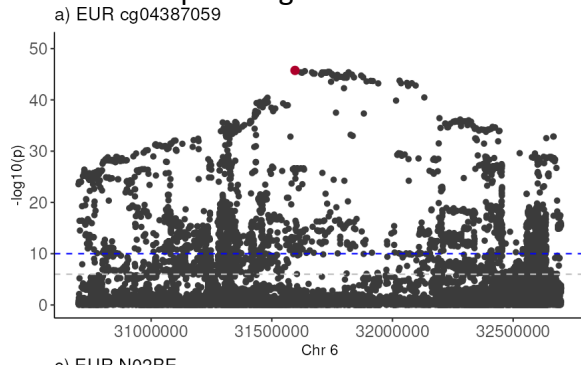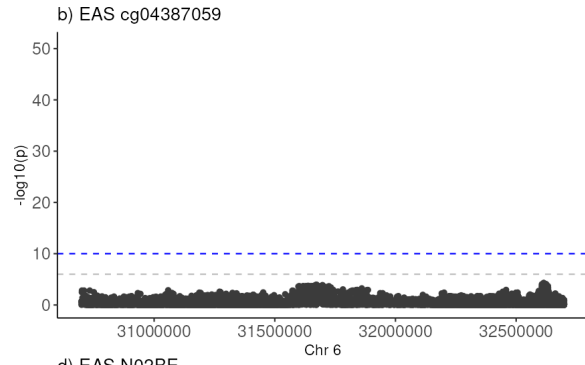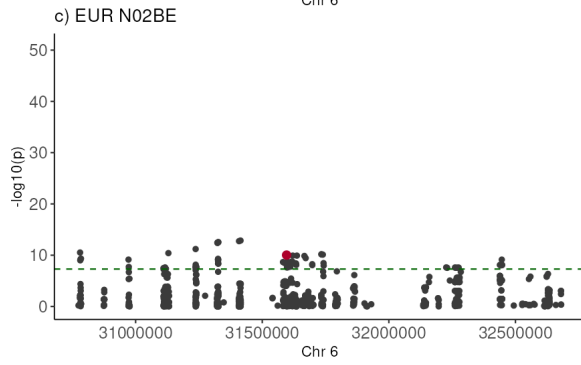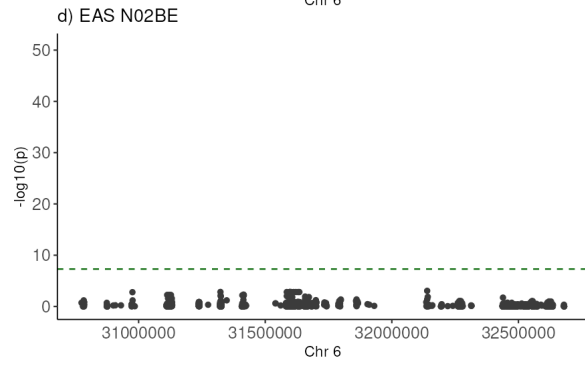

Trait NP: probe cg09611620

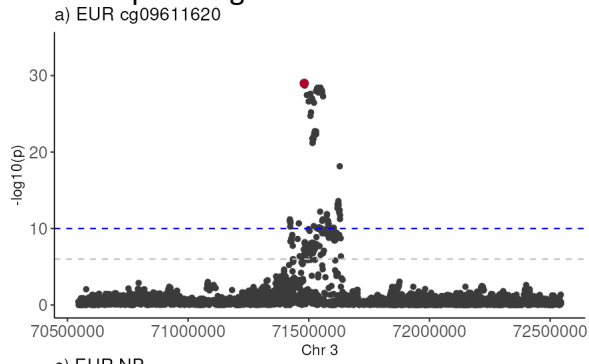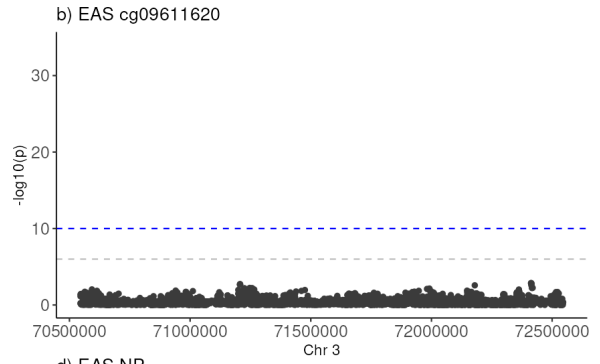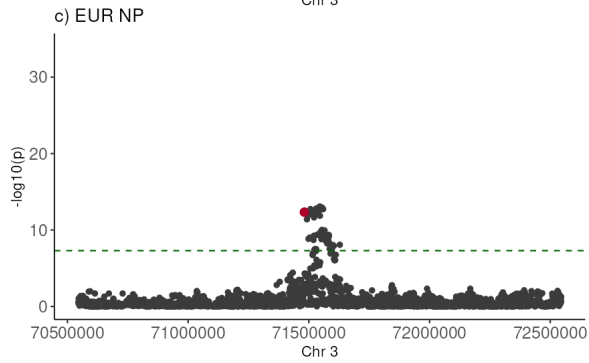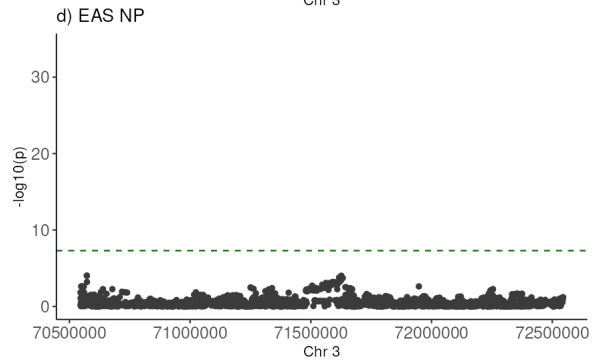

Trait NP: probe cg18318560

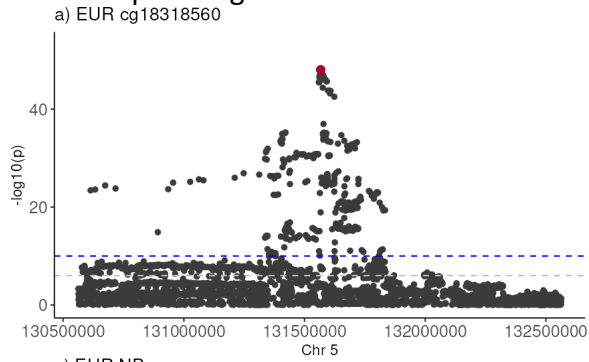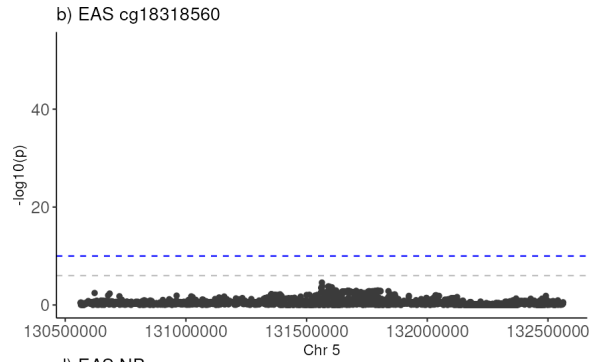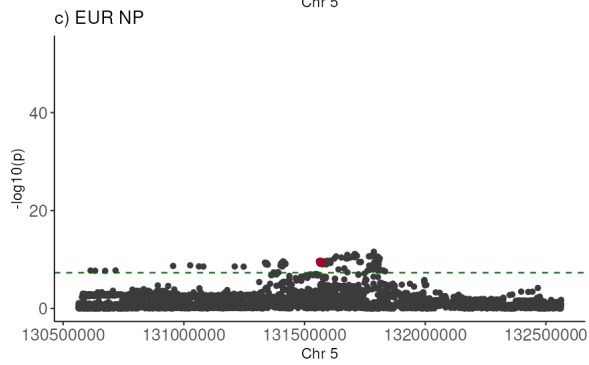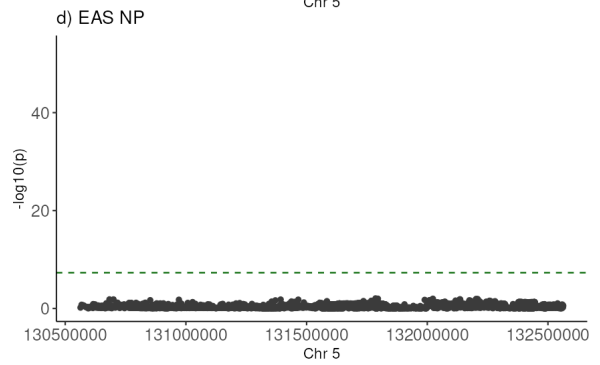



**Trait NP: probe cg22598563**

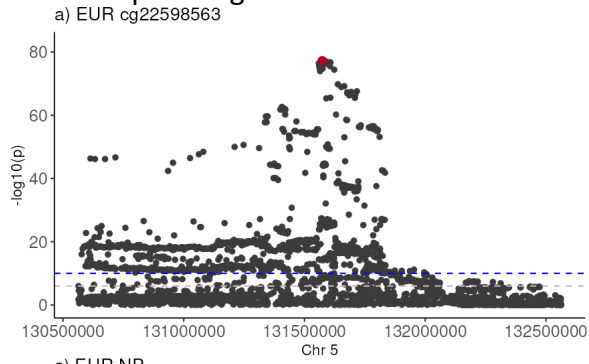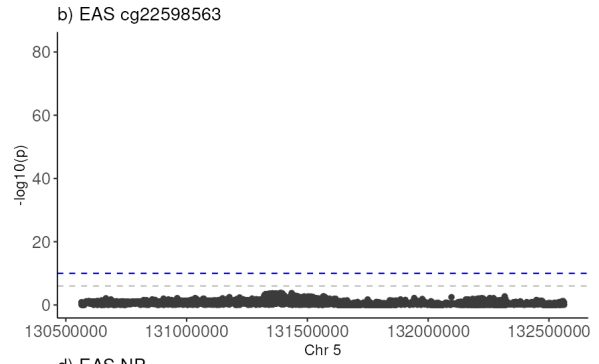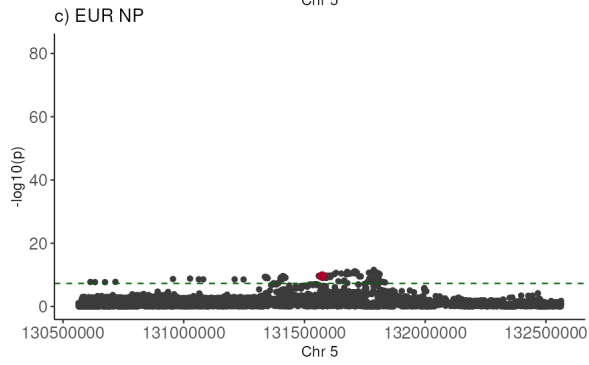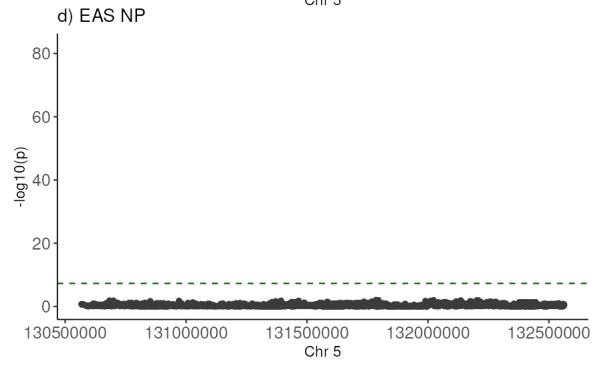

**Trait NS: probe cg04387059**

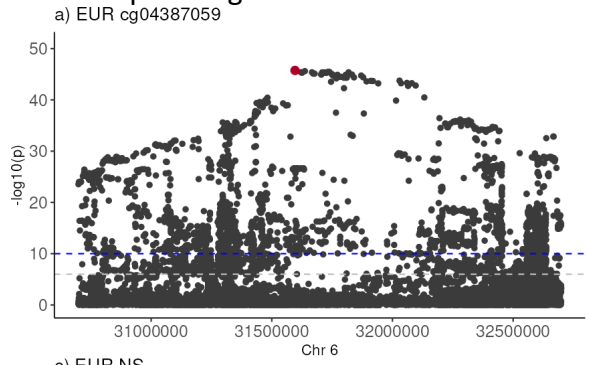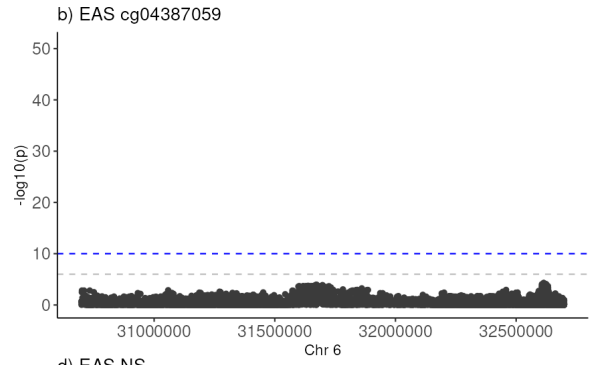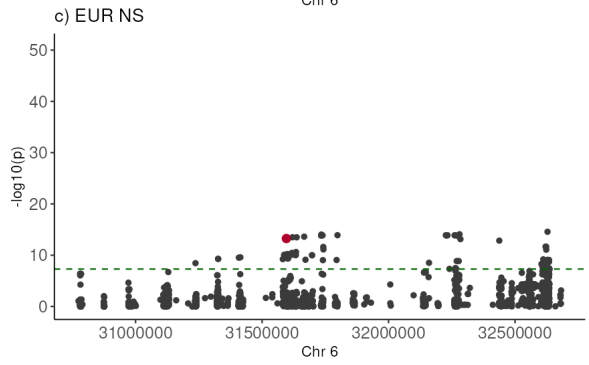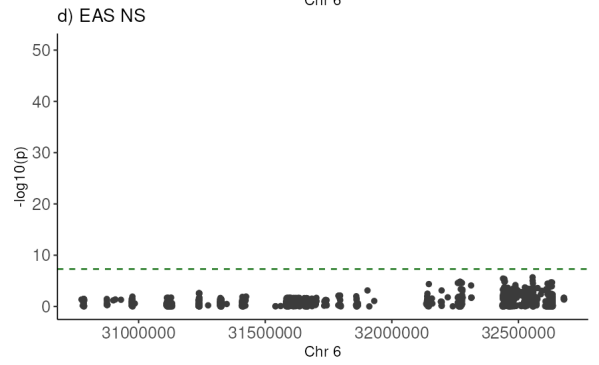

Trait PA: probe cg19197236

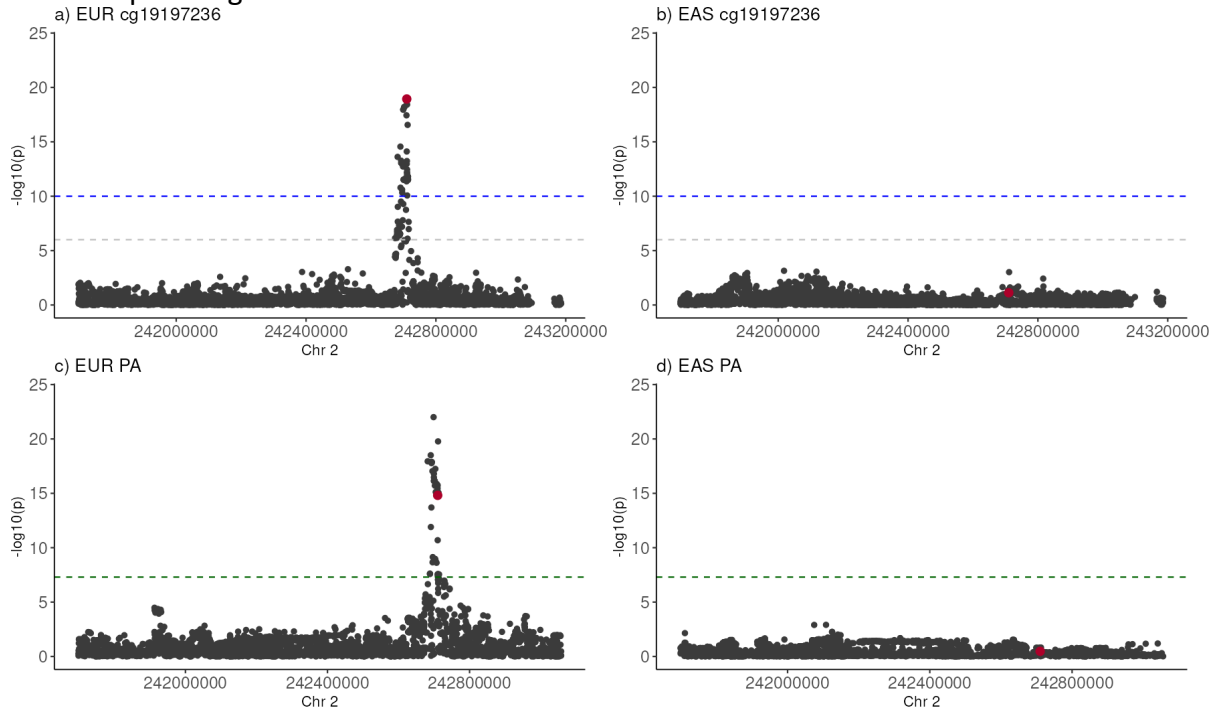

Trait PA: probe cg04387059

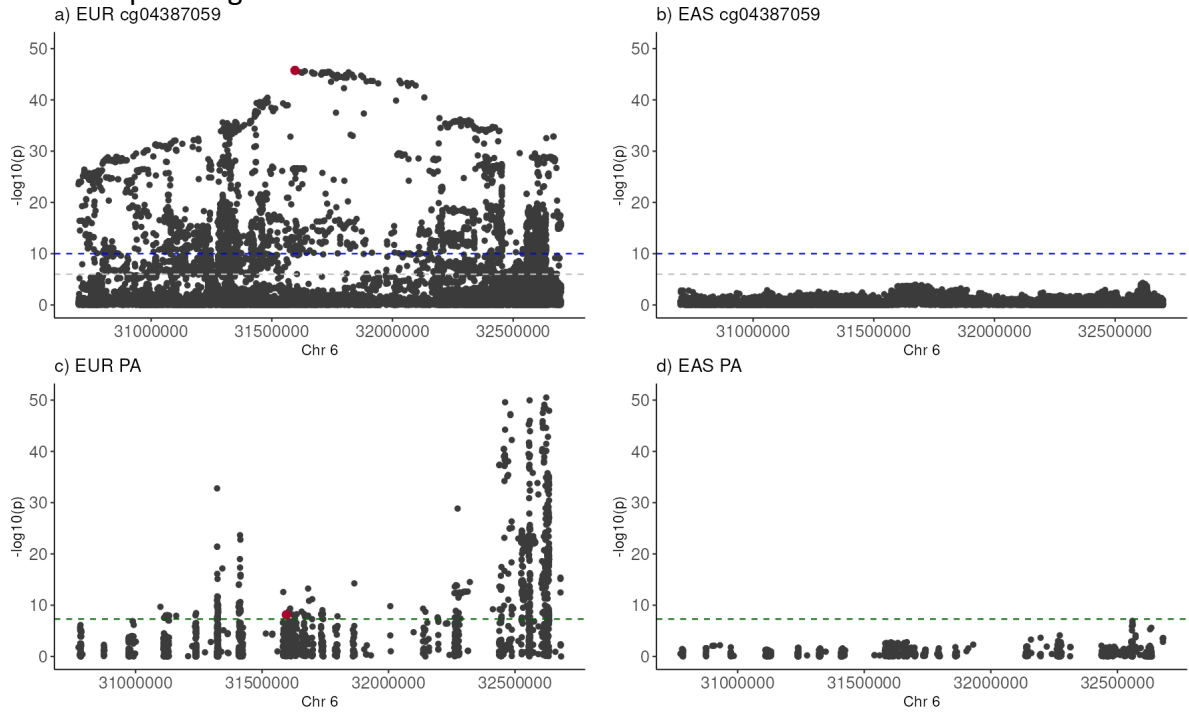

### Trait PA: probe cg24032190

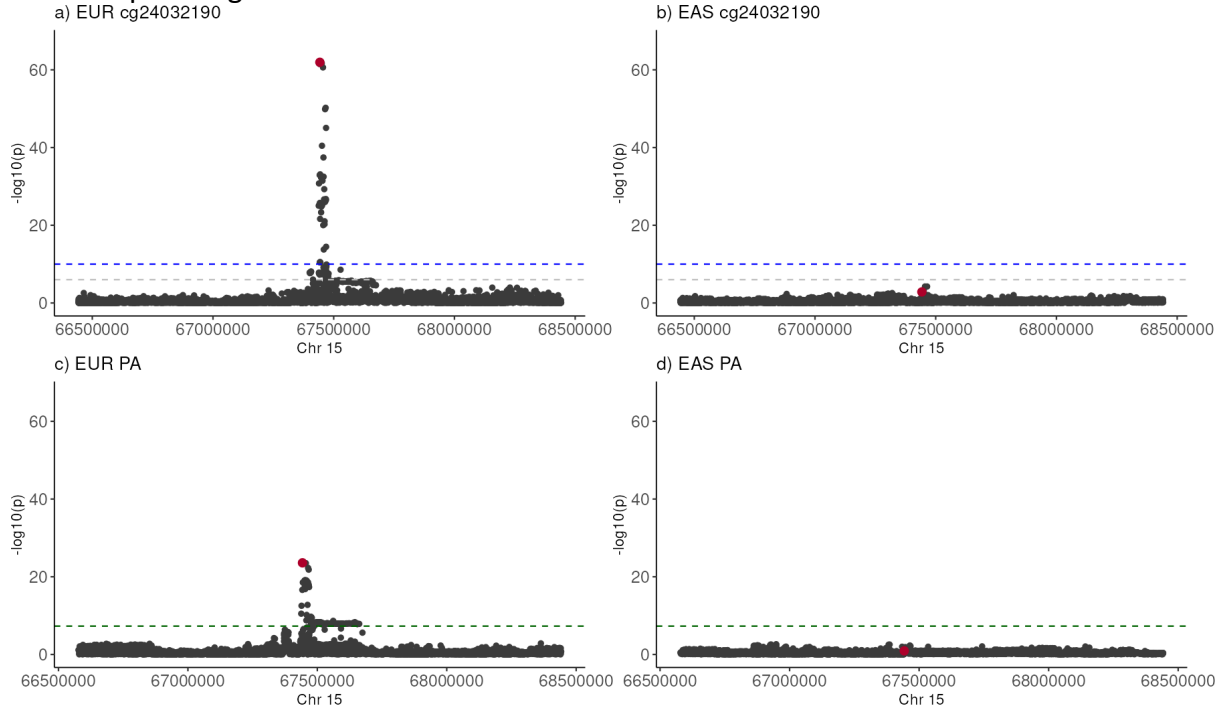

### Trait PrC: probe cg08112188

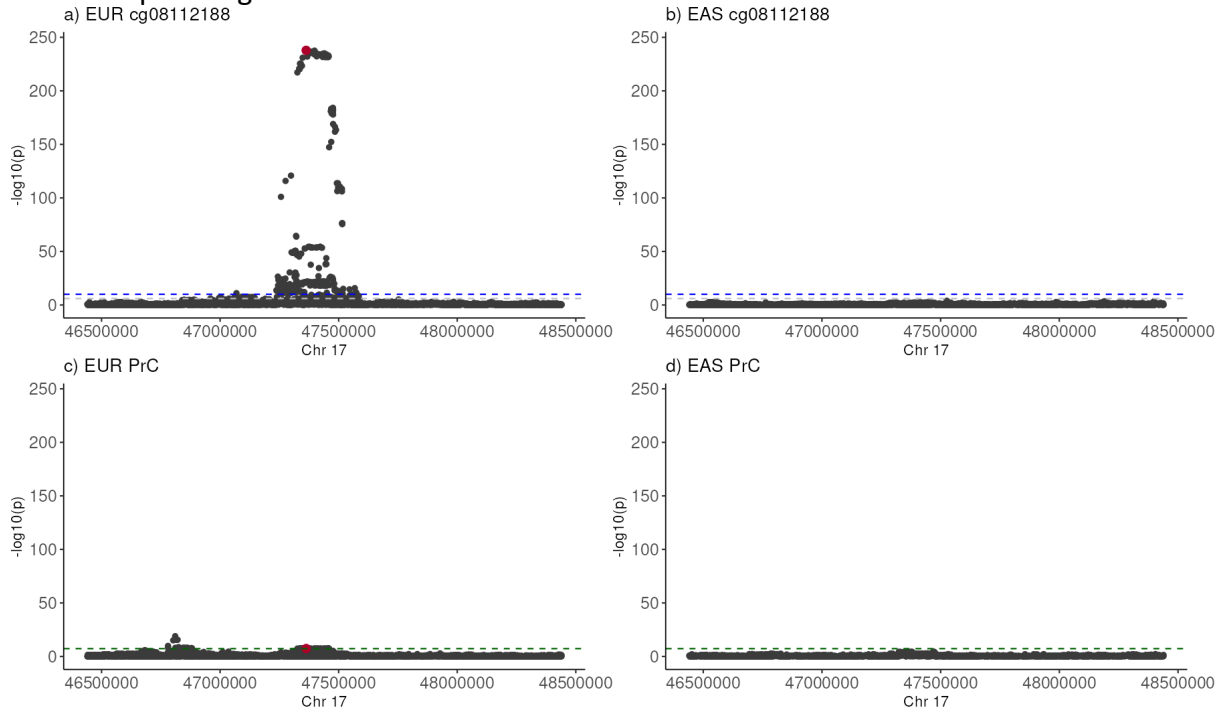

Trait R03A: probe cg19197236

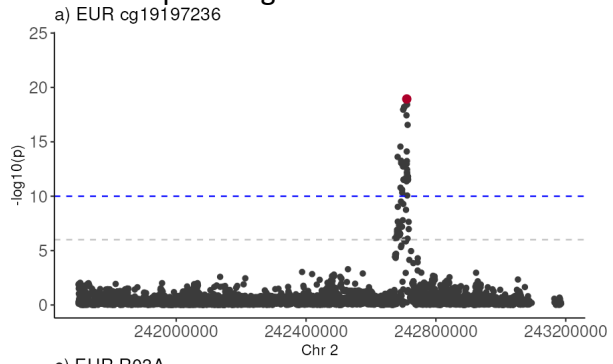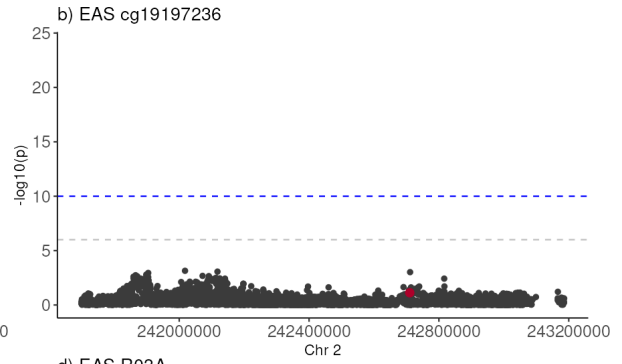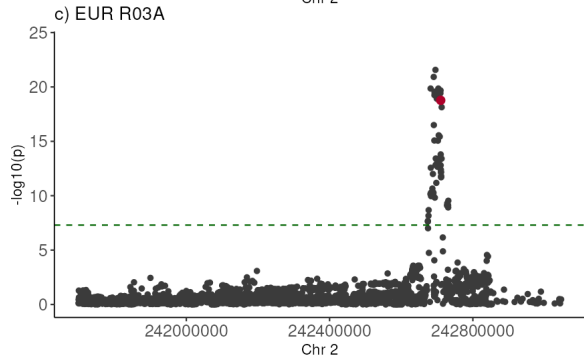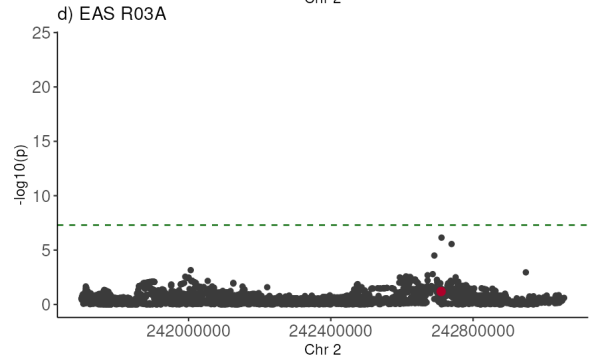

Trait R03A: probe cg18318560

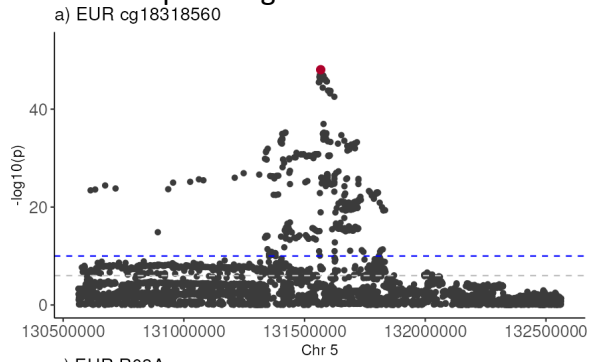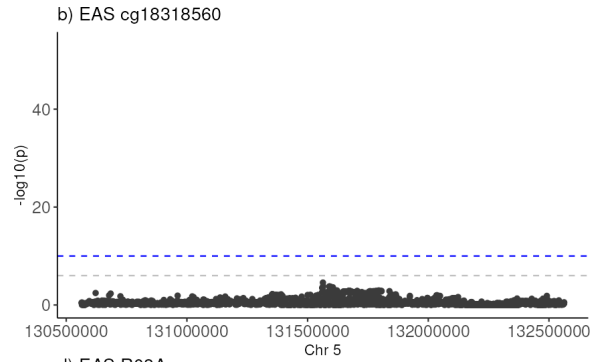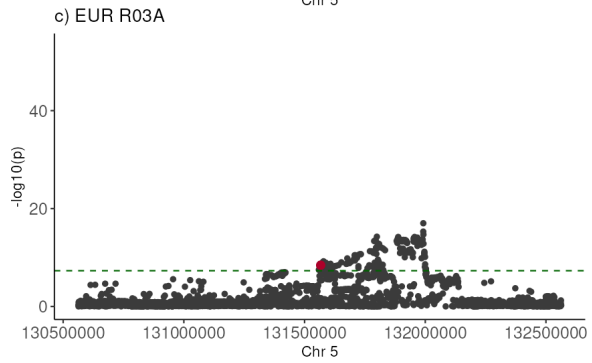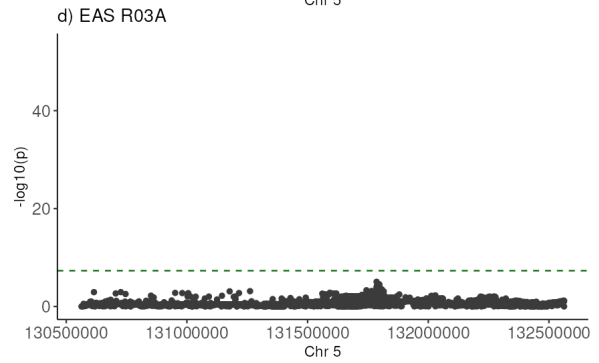

### Trait R03A: probe cg25204543

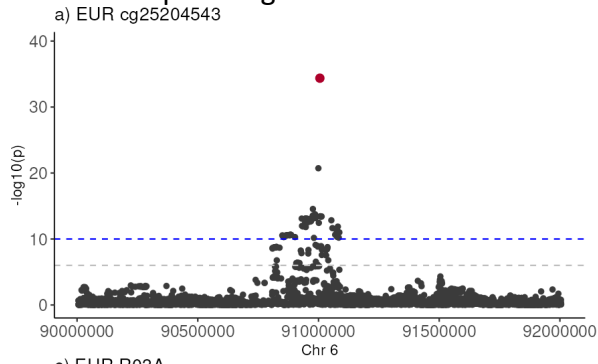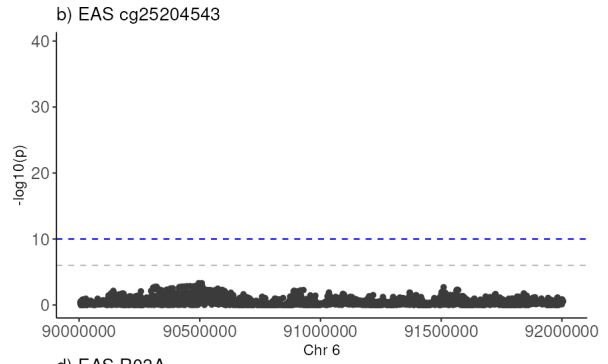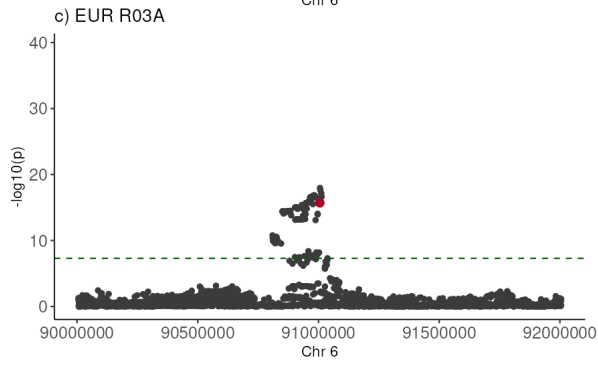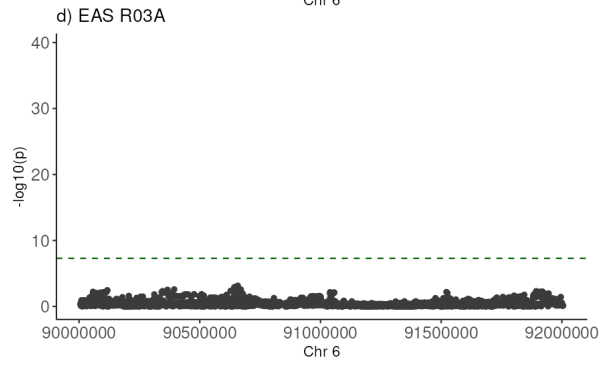

### Trait R03A: probe cg24032190

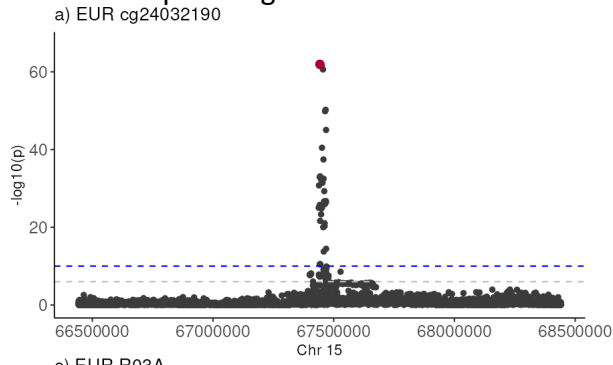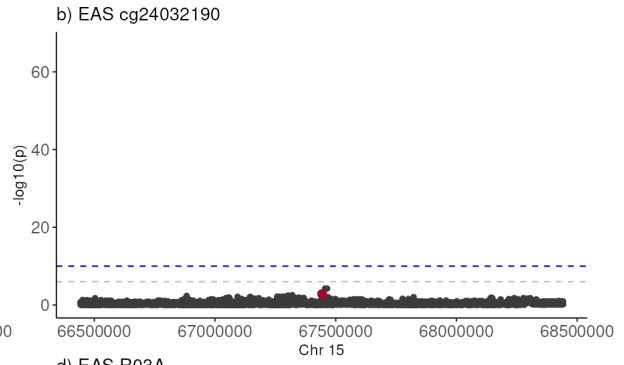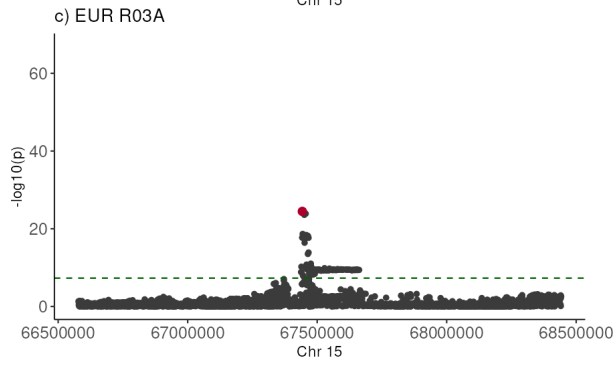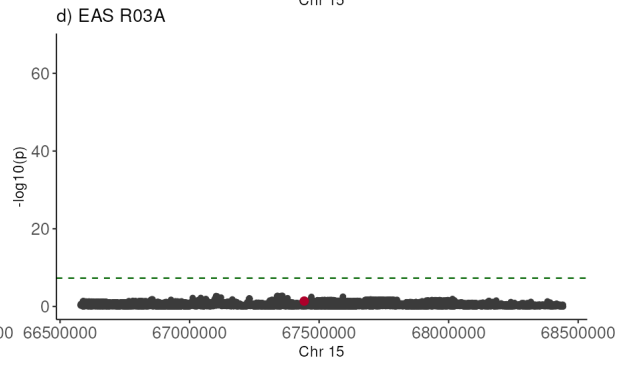

### Trait R03A: probe cg15636887

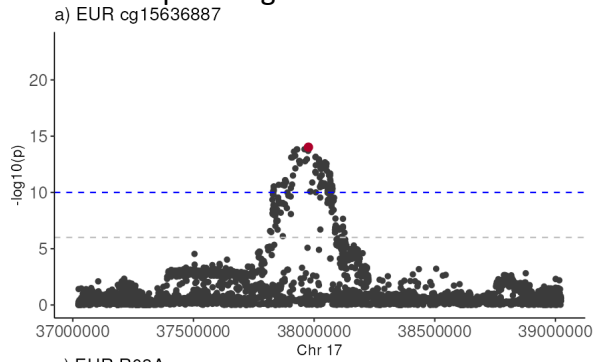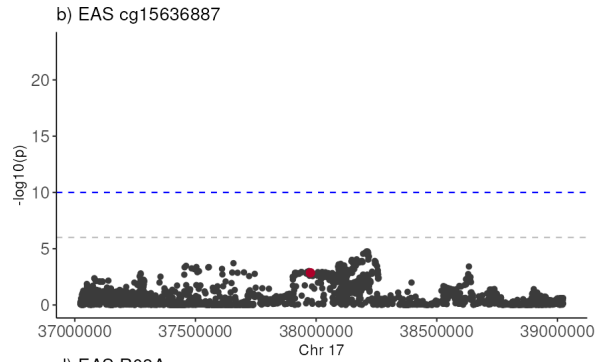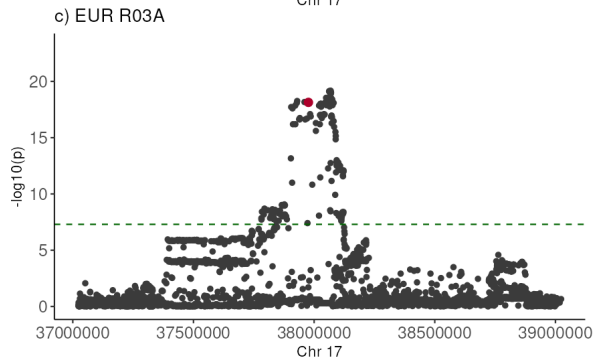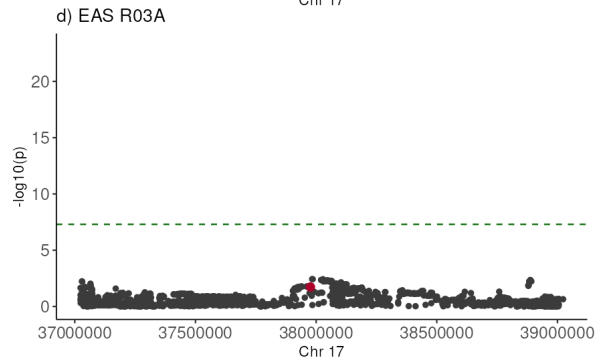

### Trait R03BA: probe cg19197236

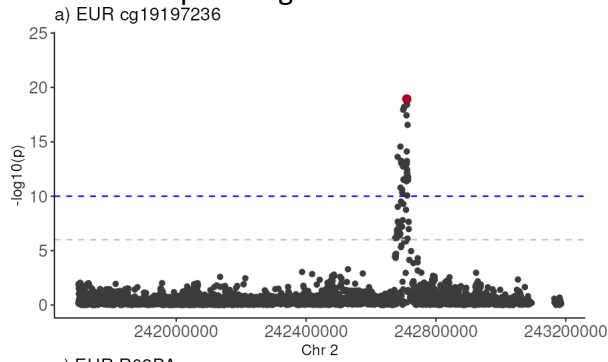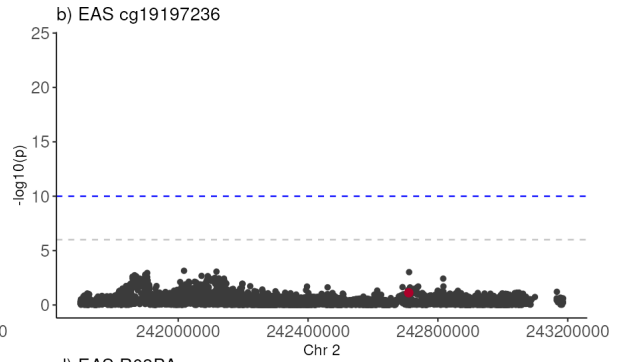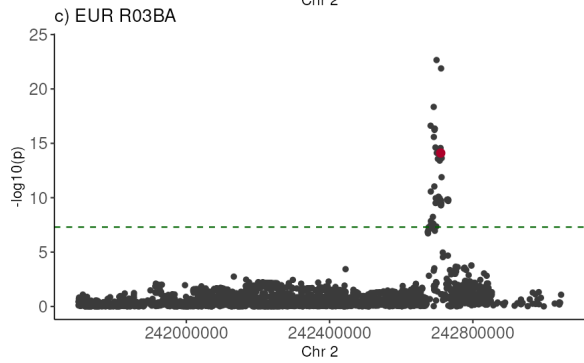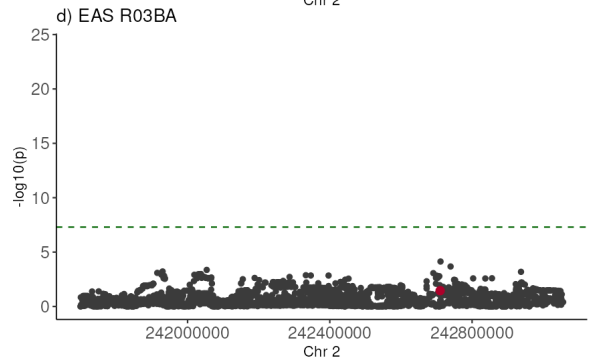

### Trait R03BA: probe cg25204543

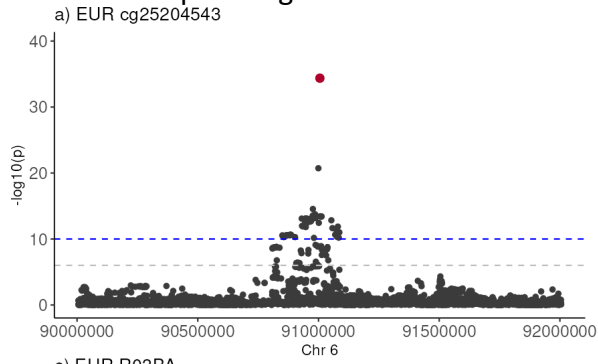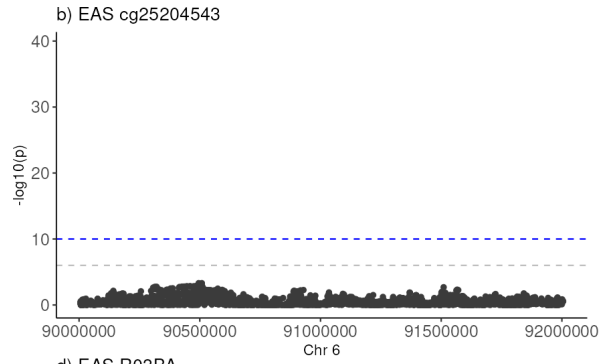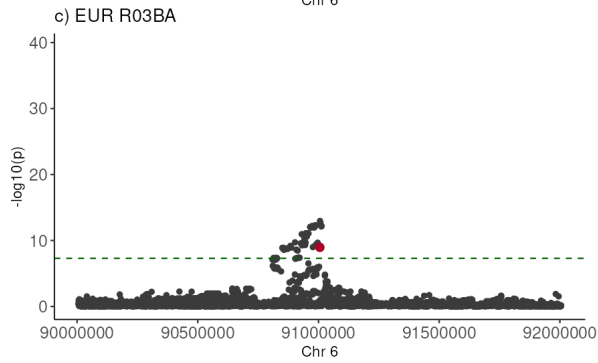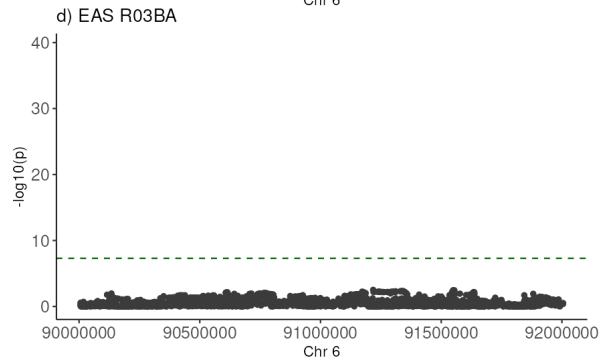

### Trait R03BA: probe cg24032190

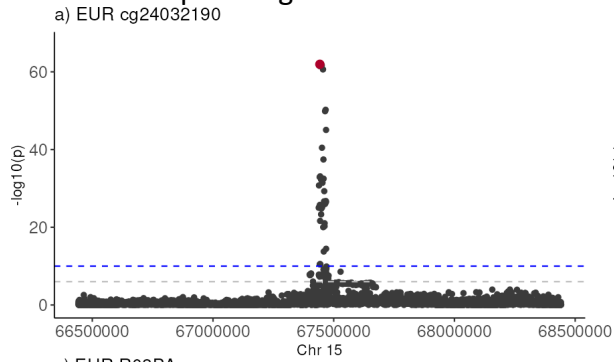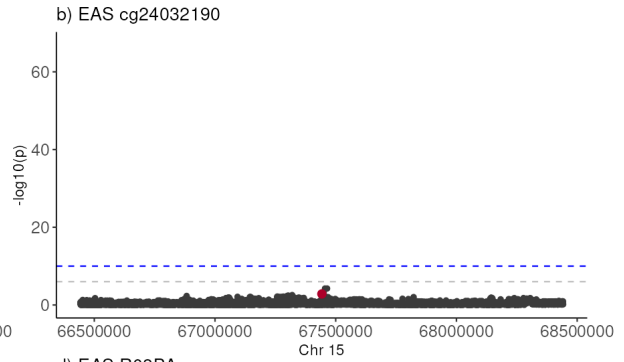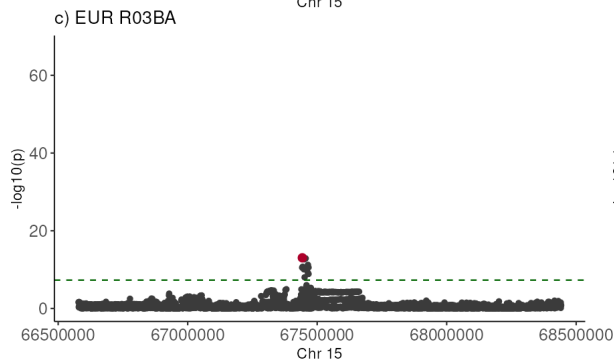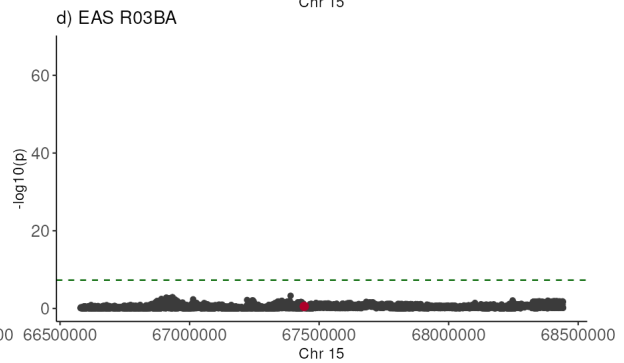

### Trait SAP: probe cg12427321

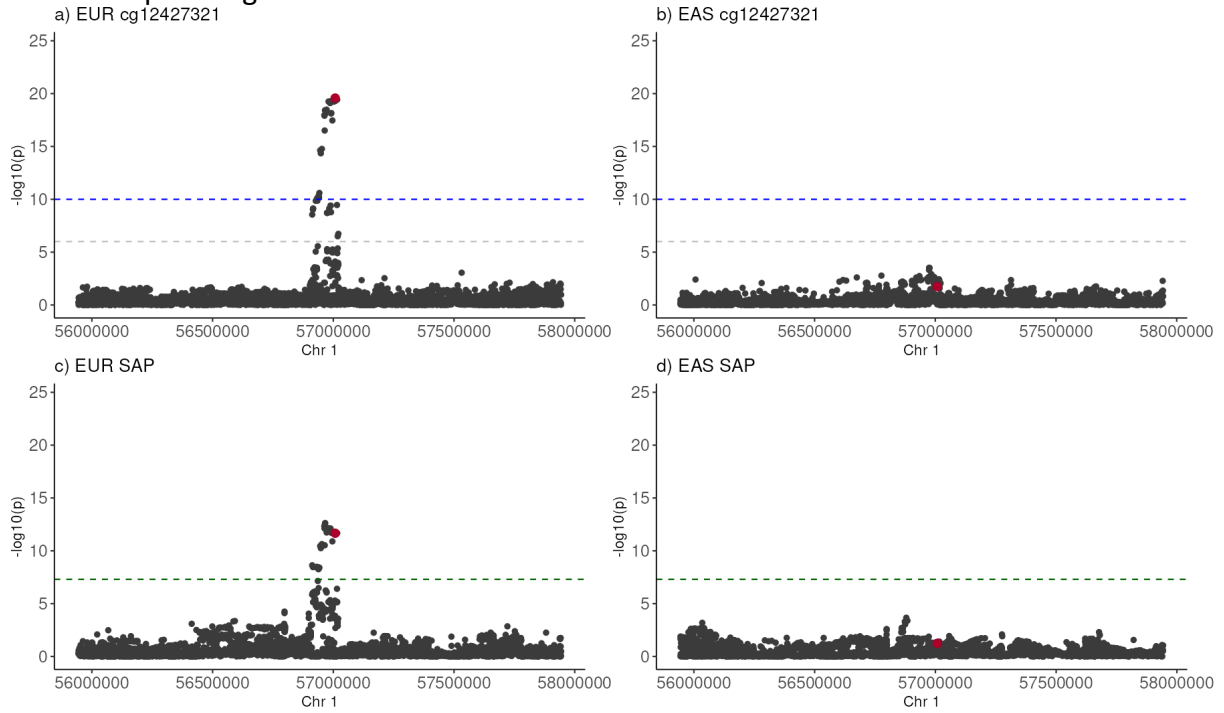

### Trait sCr: probe cg16413030

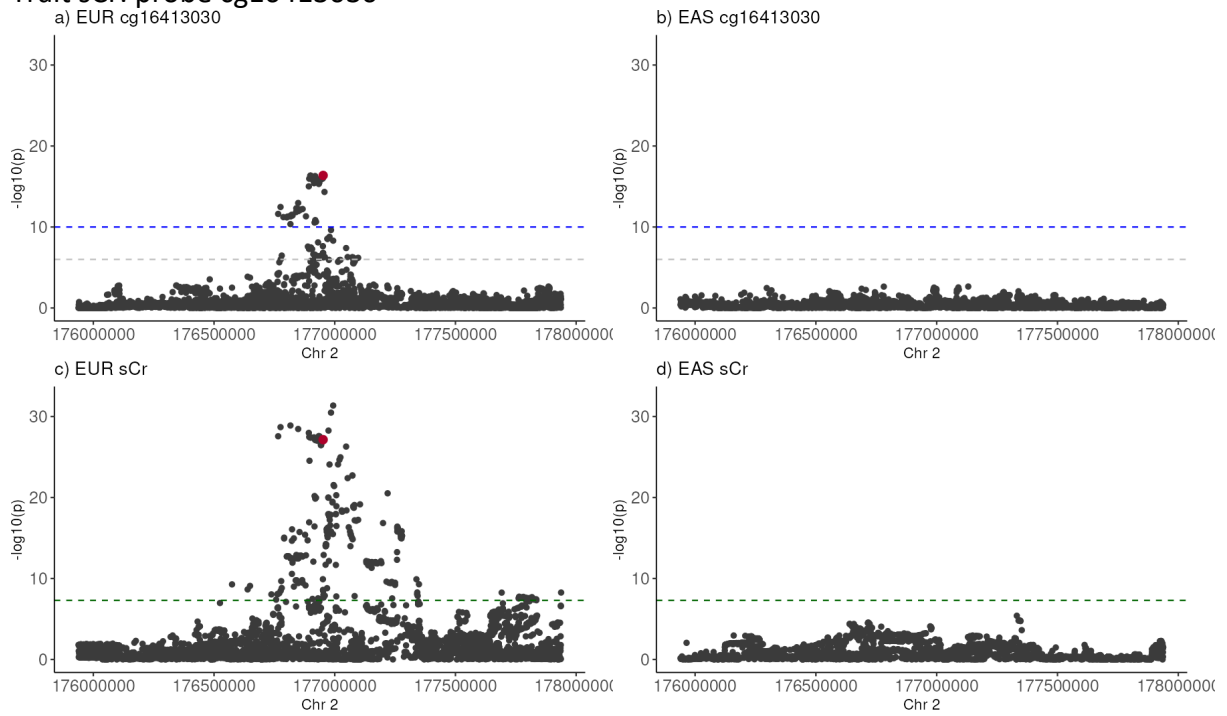



### Trait sCr: probe cg15640734

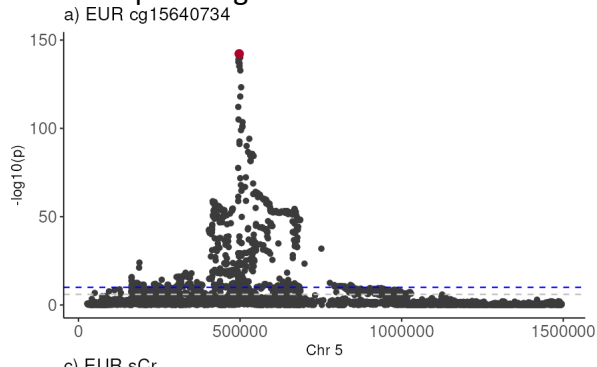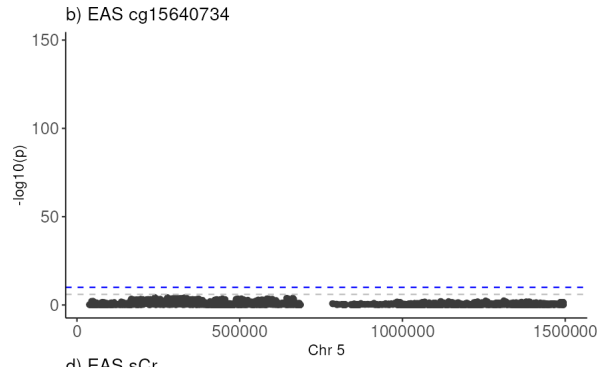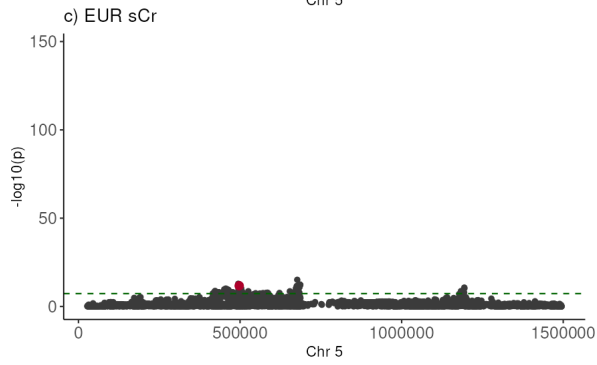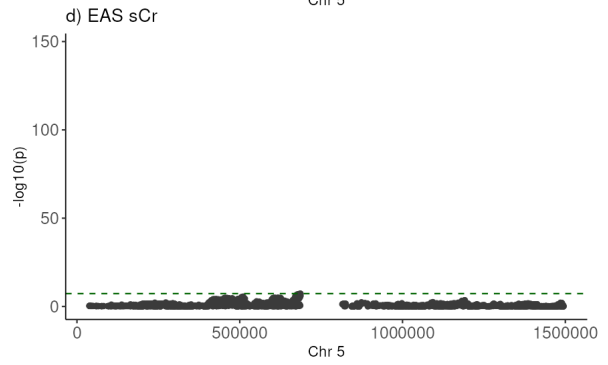

### Trait SkC: probe cg25204543

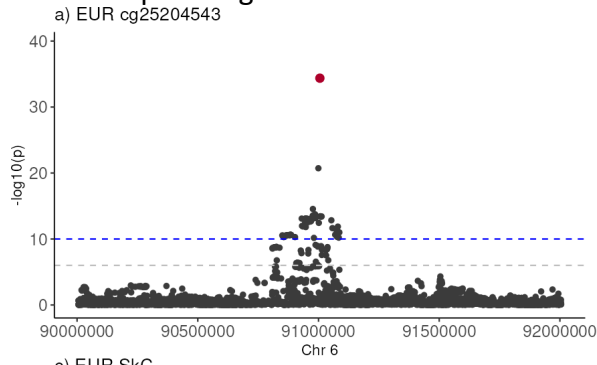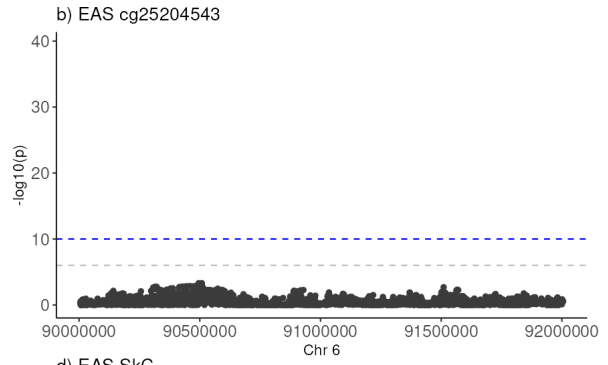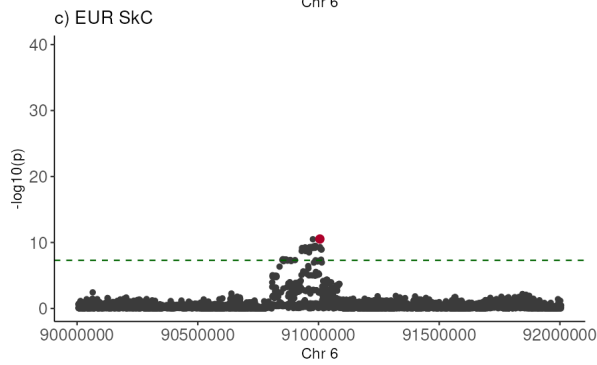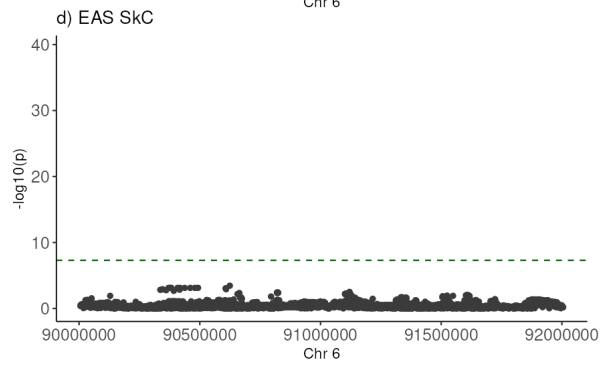

Trait SkC: probe cg03258727

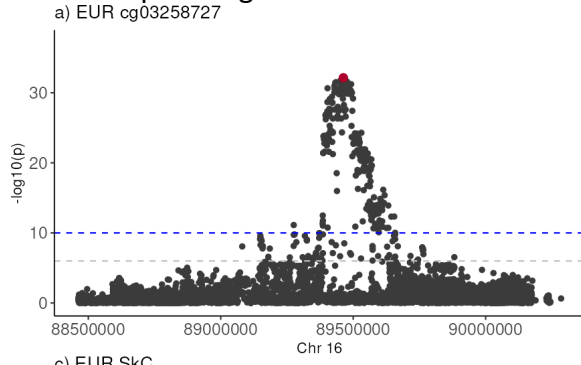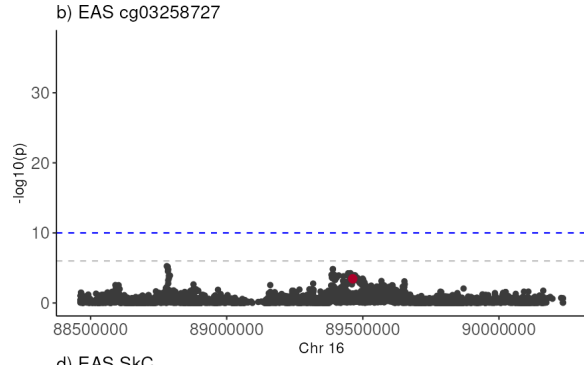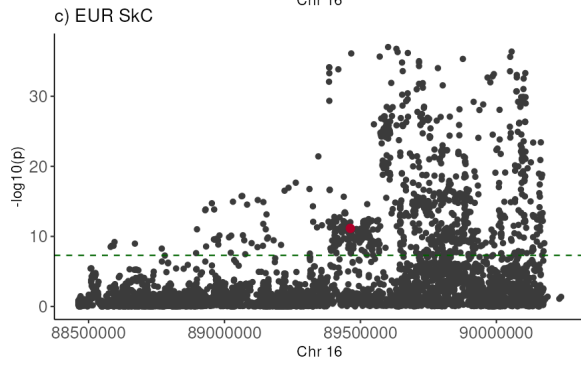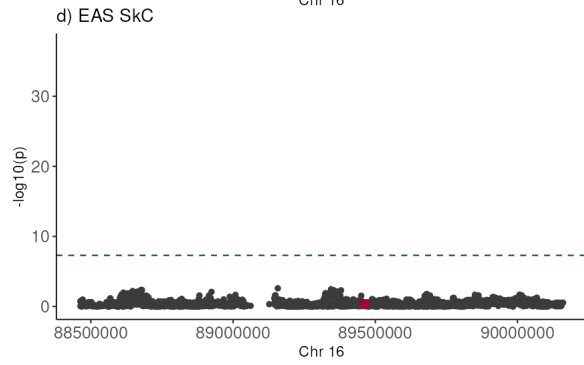

Trait SkC: probe cg09313938

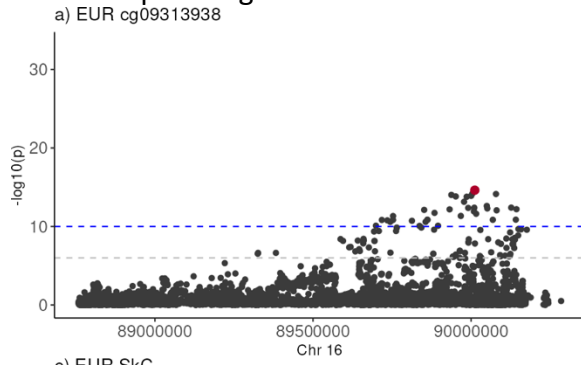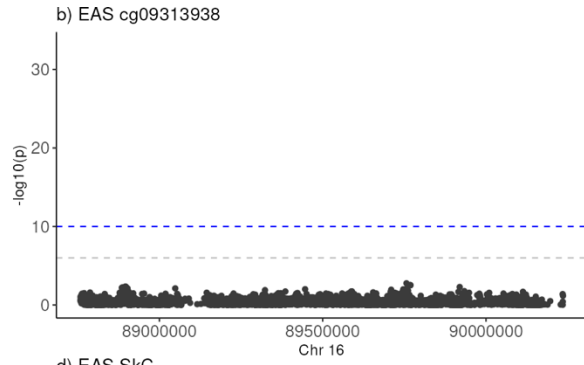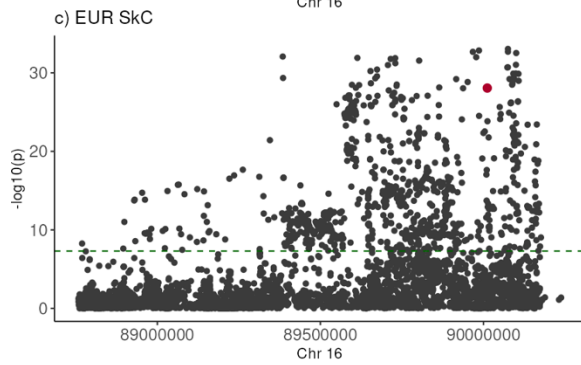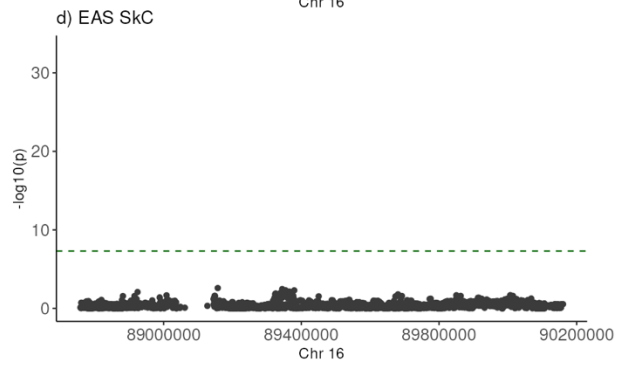

Trait SkC: probe cg23200841

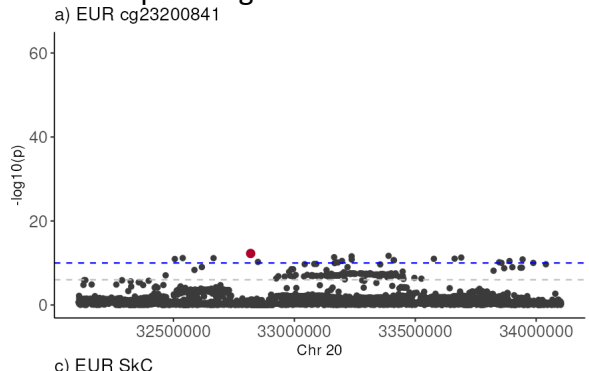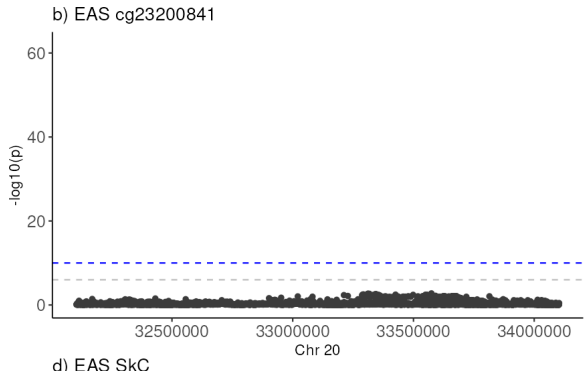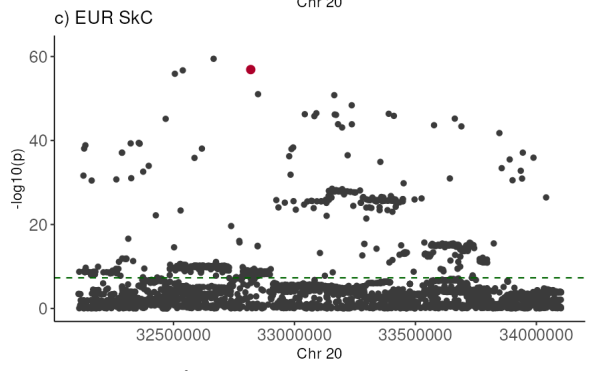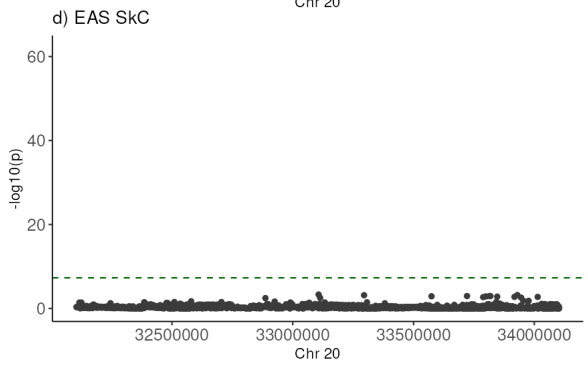

Trait SLE: probe cg04387059

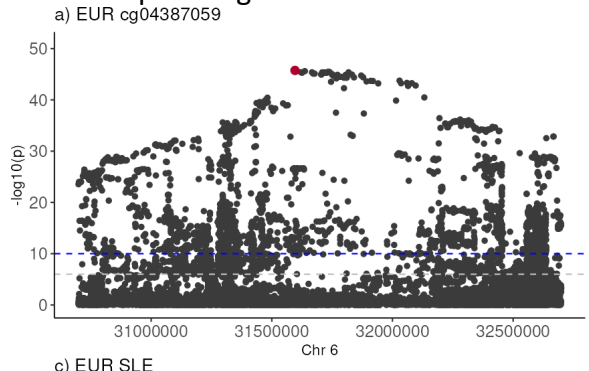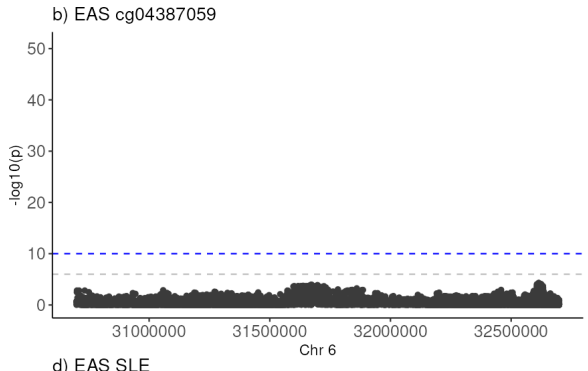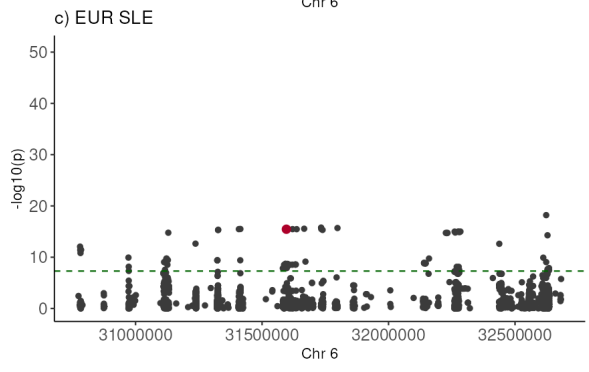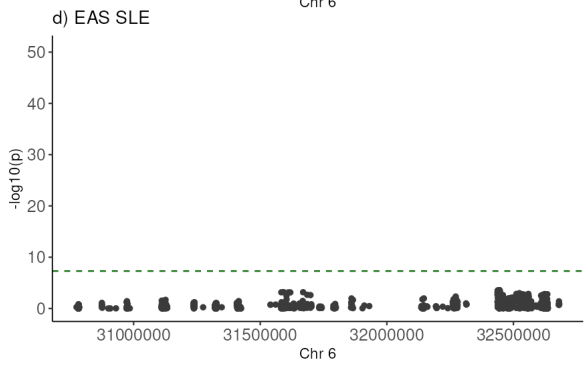

Trait SLE: probe cg12315302

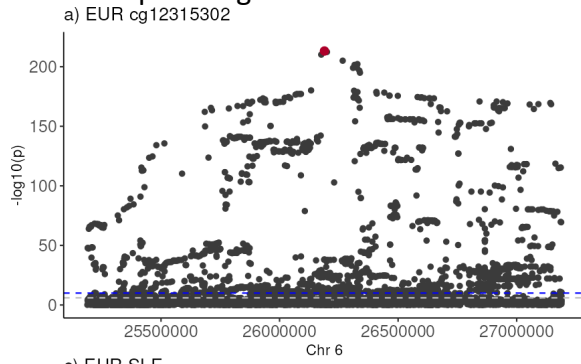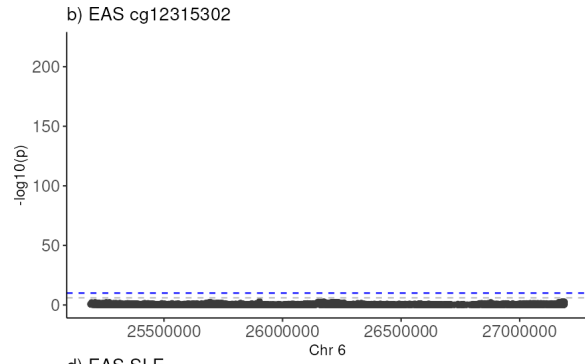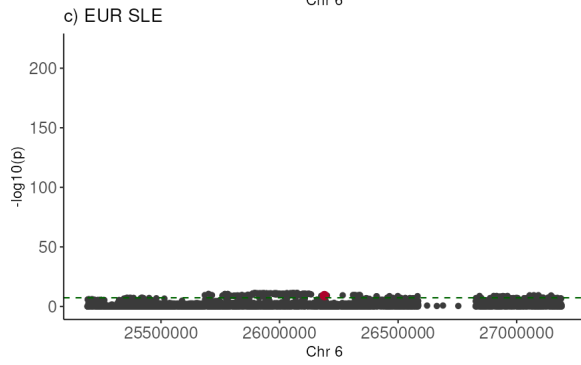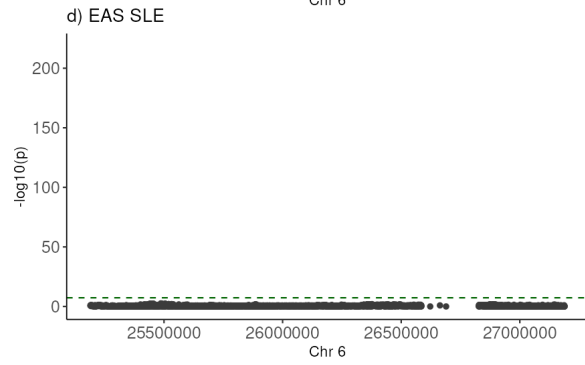

Trait SLE: probe cg12351042

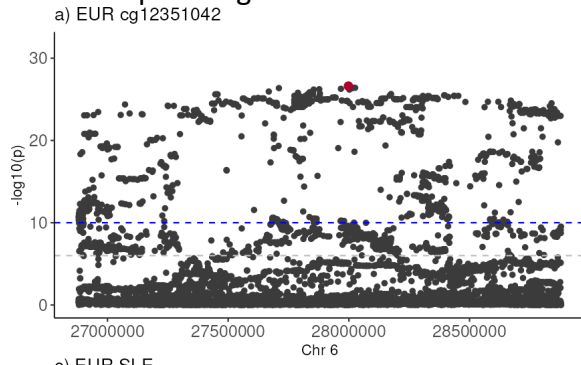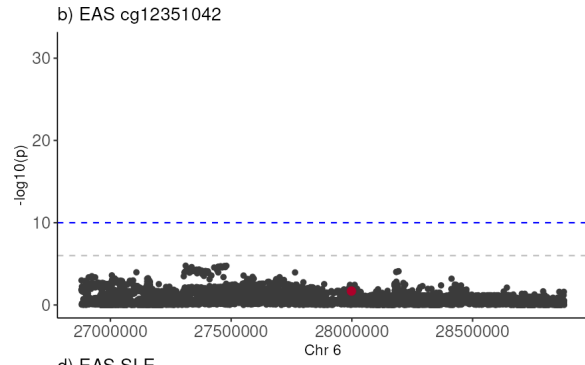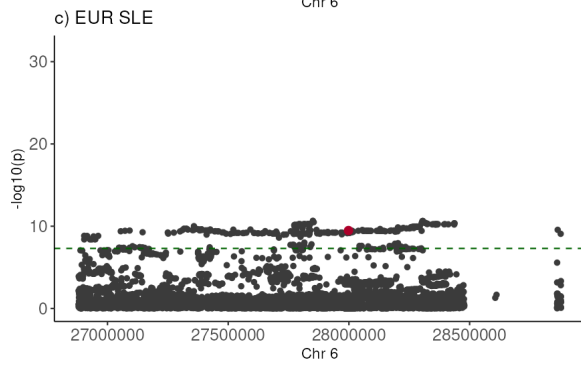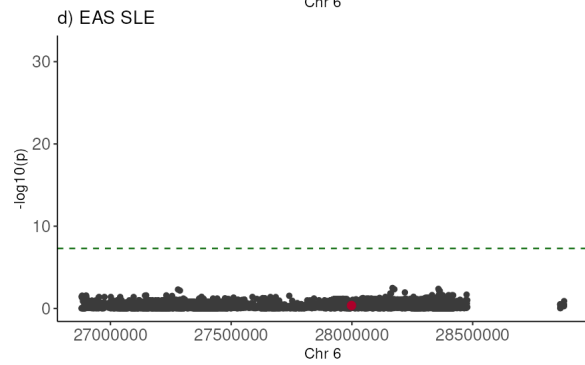

### Trait SLE: probe cg19084075

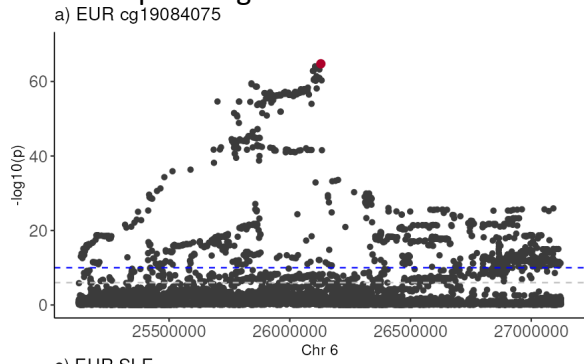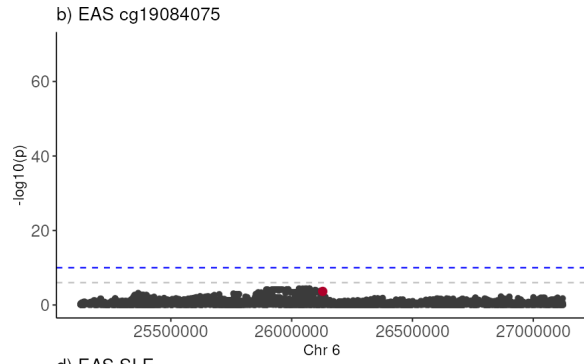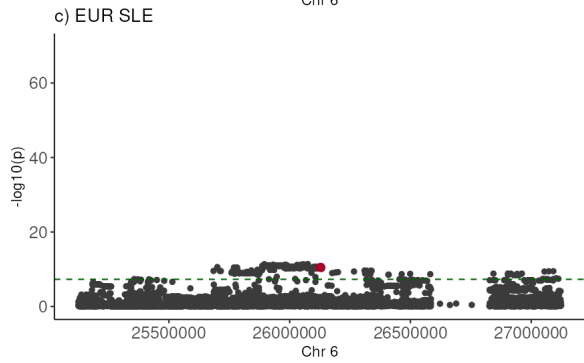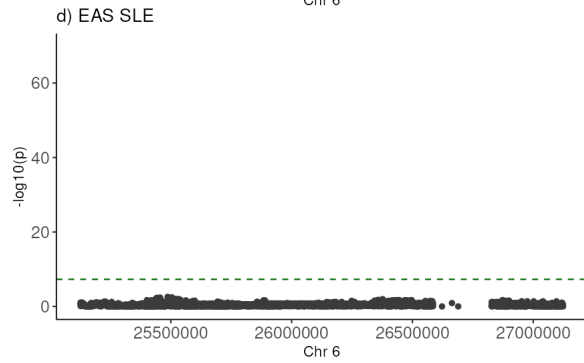

### Trait SS: probe cg04387059

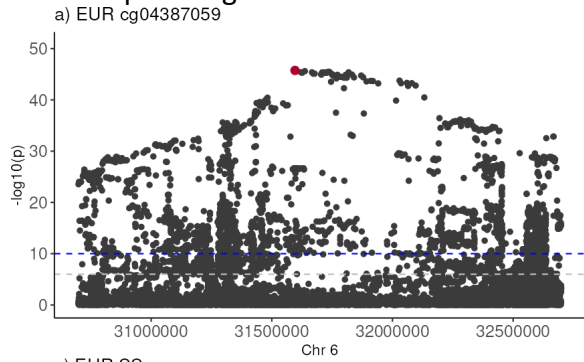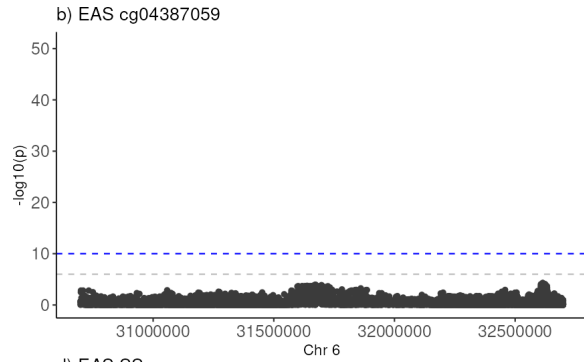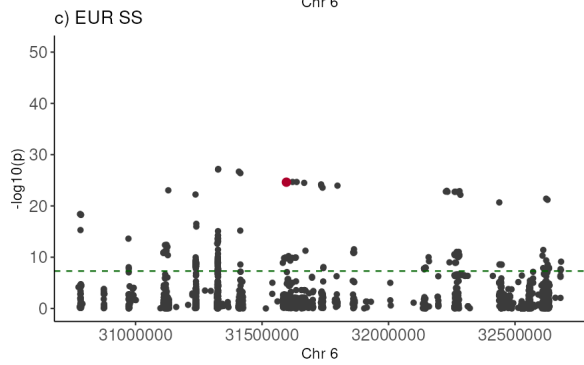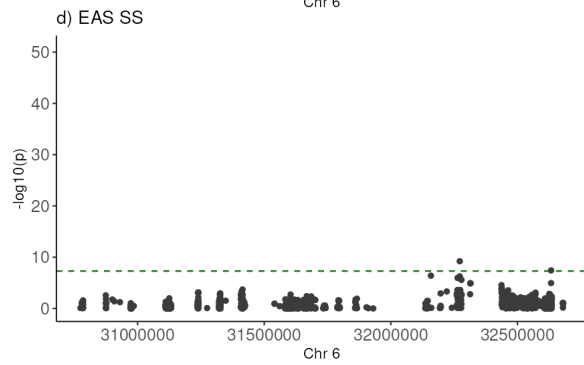

### Trait T1D: probe cg12351042

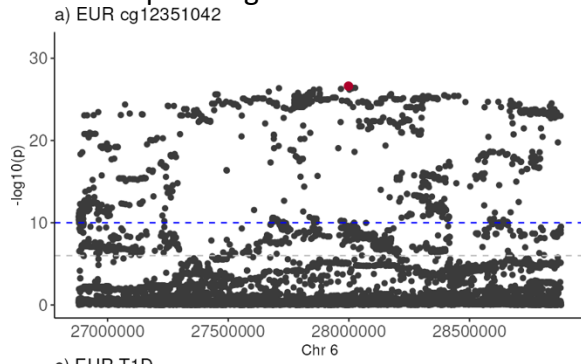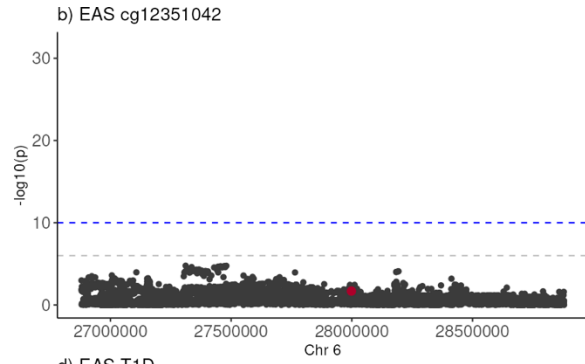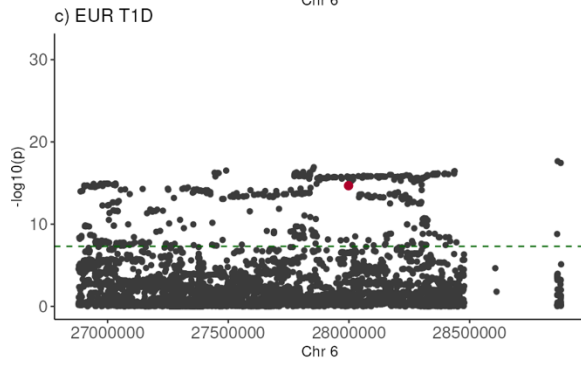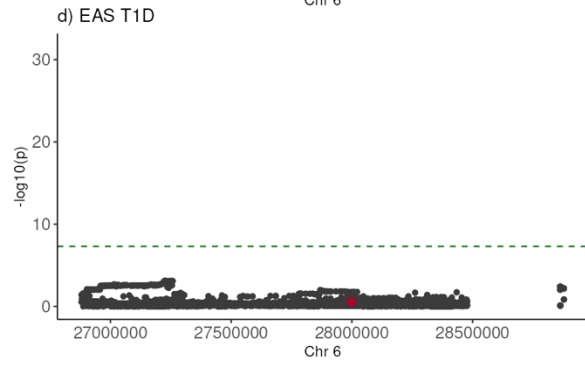

### Trait T2D: probe cg21034289

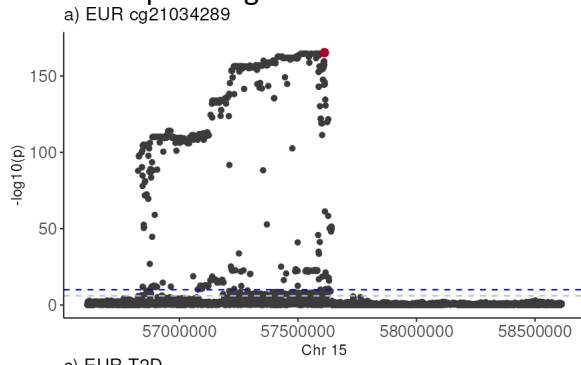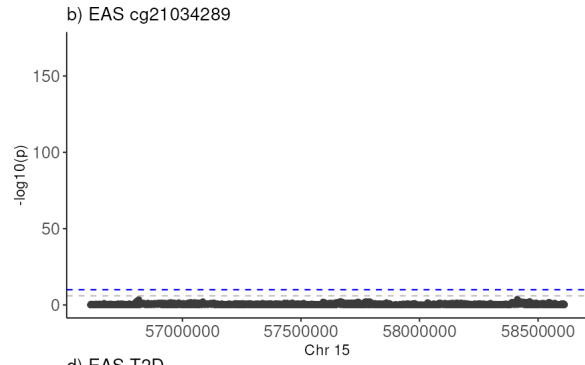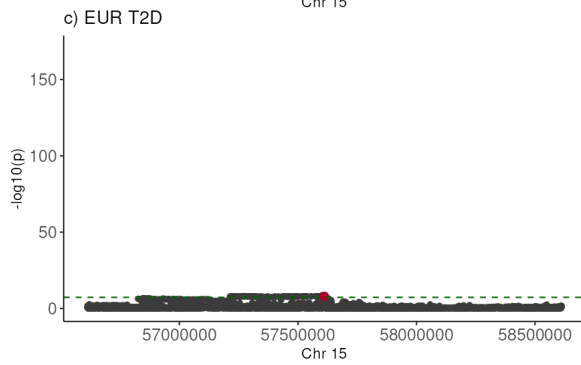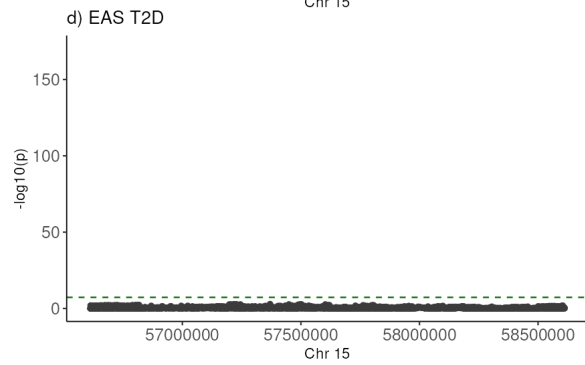

### Trait TBil: probe cg15967709

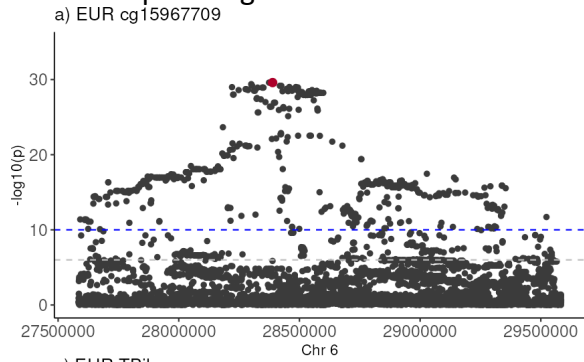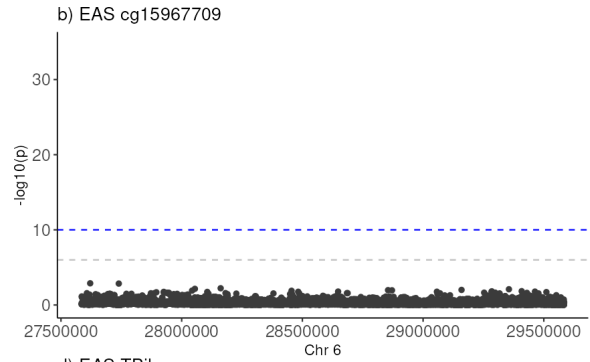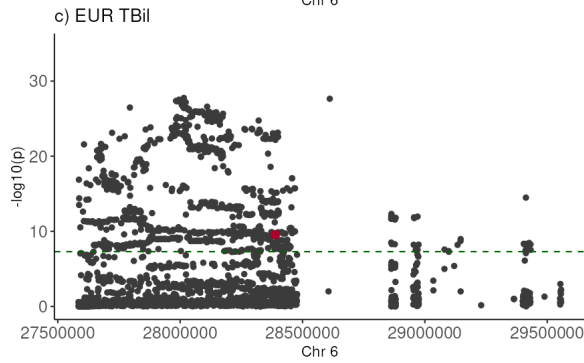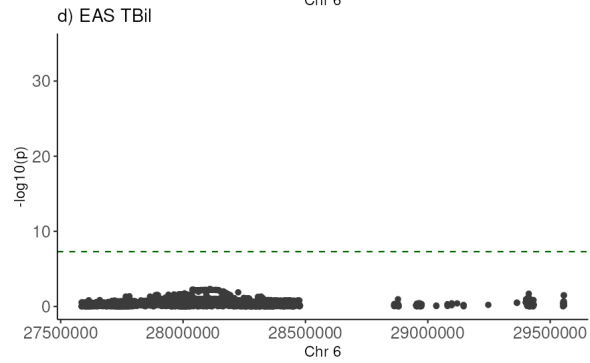

### Trait ThC: probe cg11258943

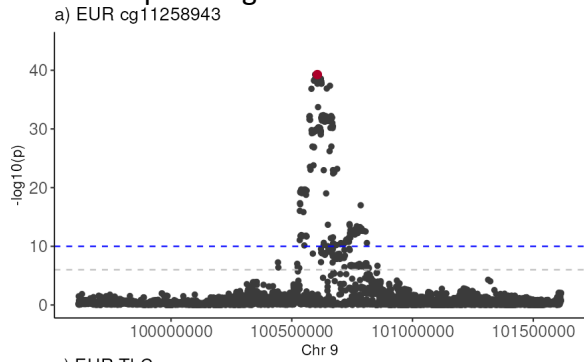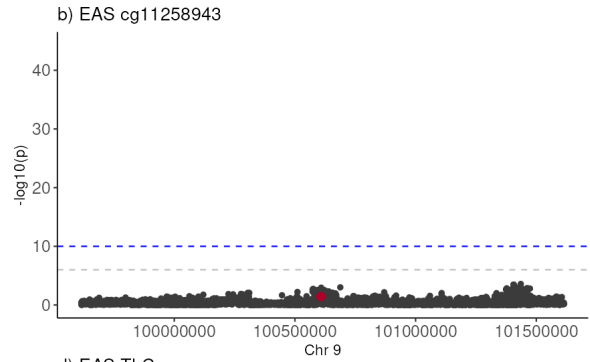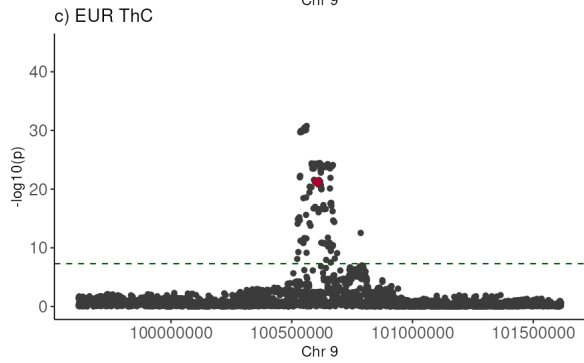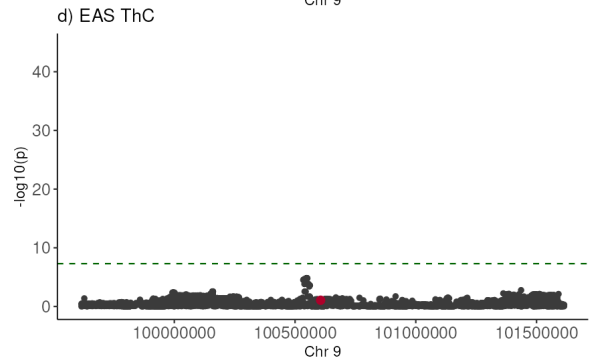

**Trait UA: probe cg05790579**

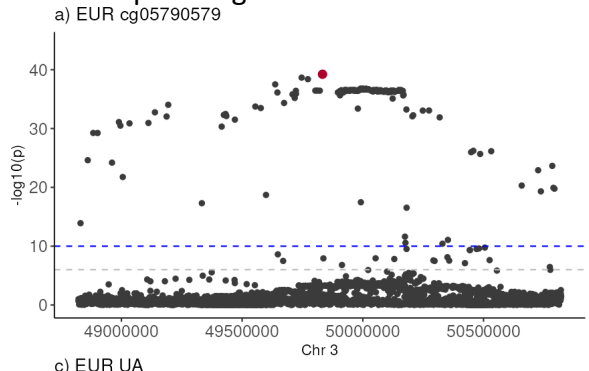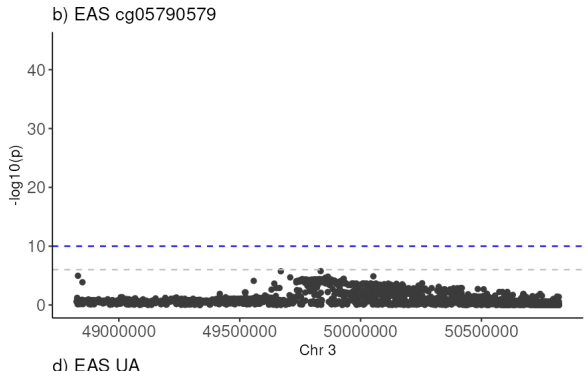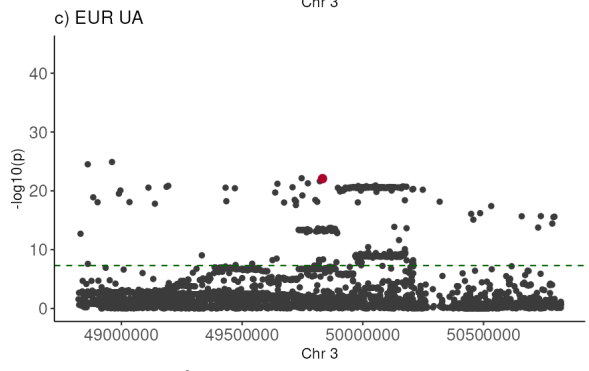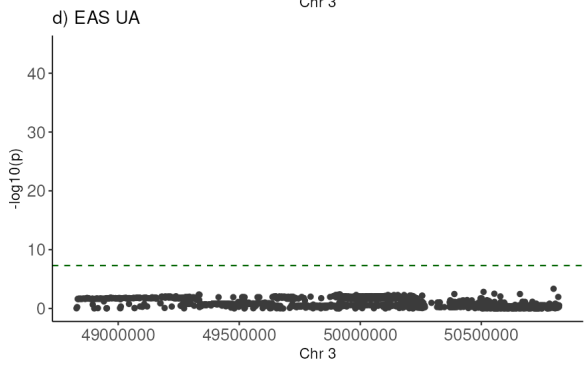

**Trait Var: probe cg27220401**

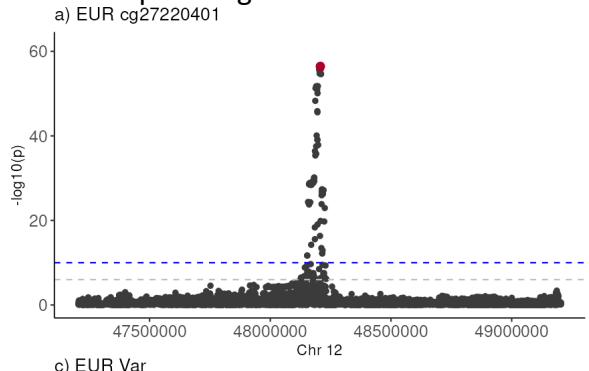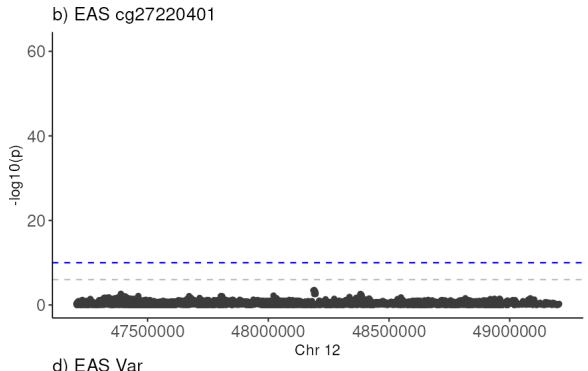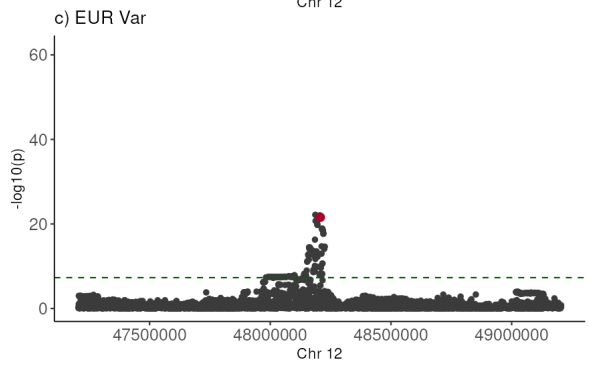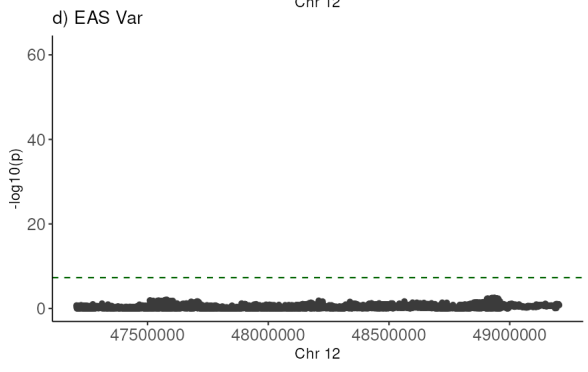



**Trait Var: probe cg03699074**

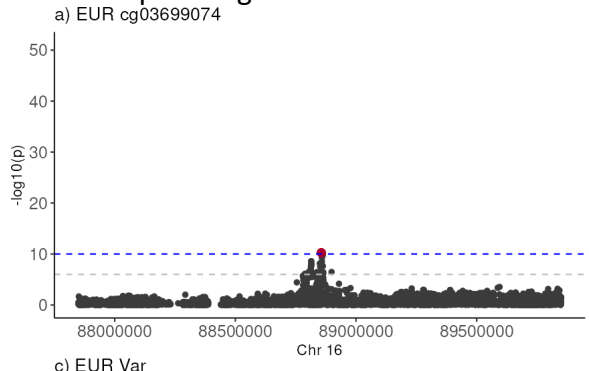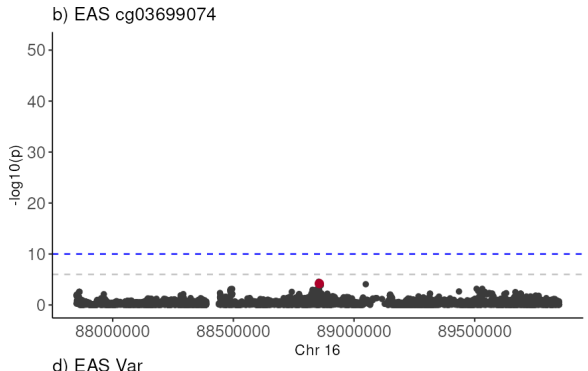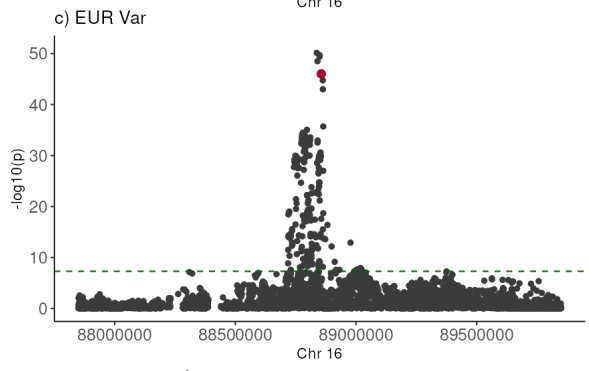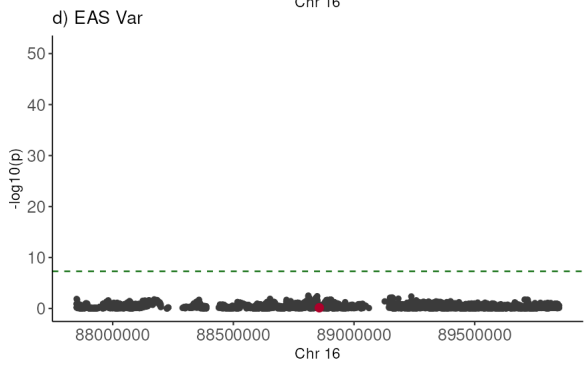

**Trait Var: probe cg01656853**

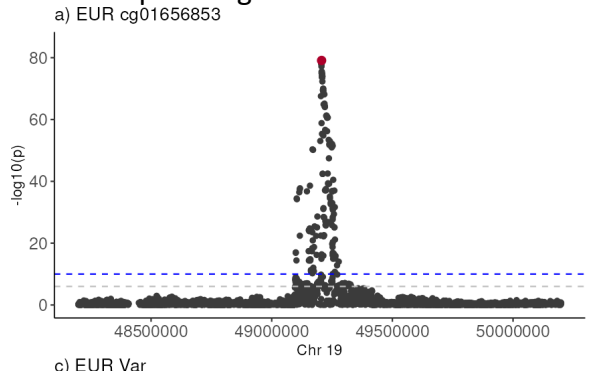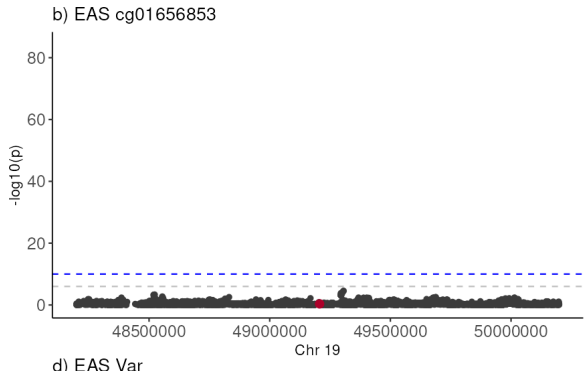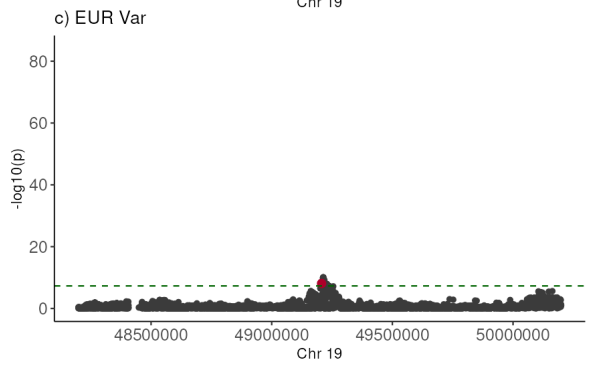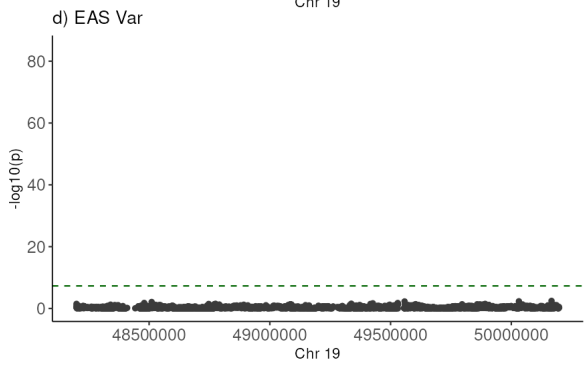

**Trait Var: probe cg08873673**

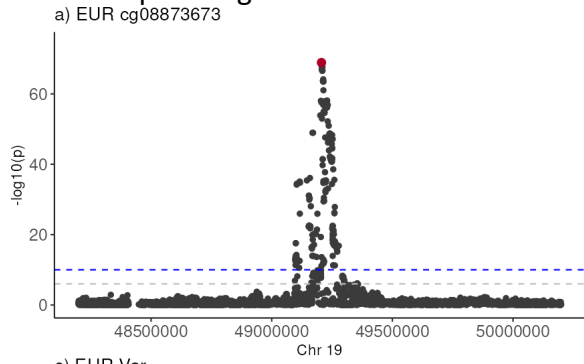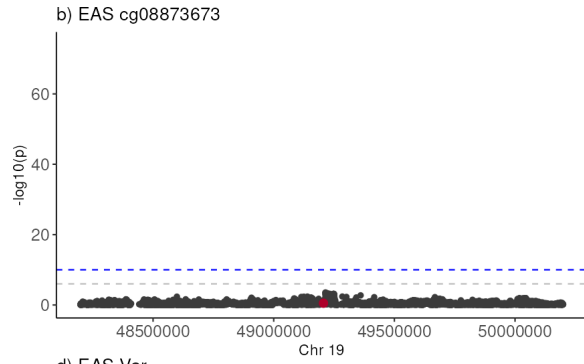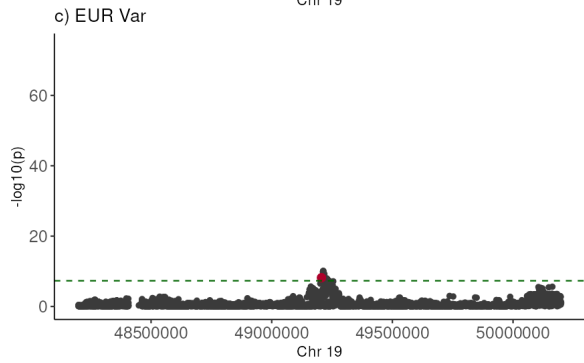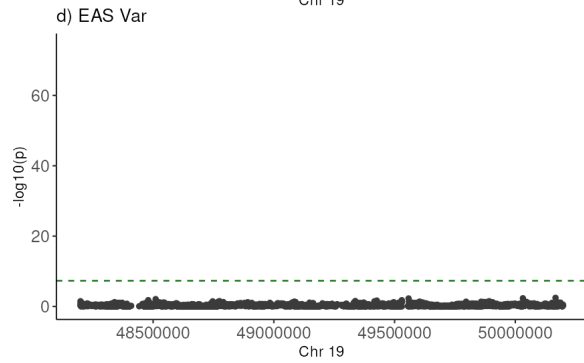

**Trait WBC: probe cg06760507**

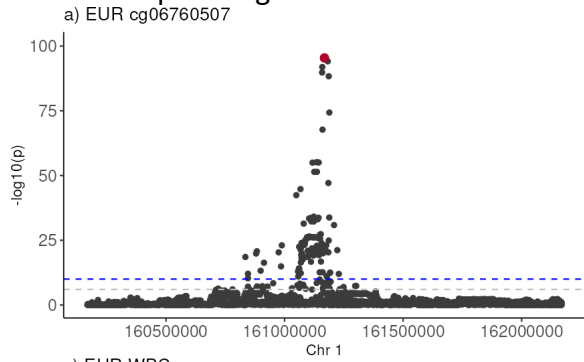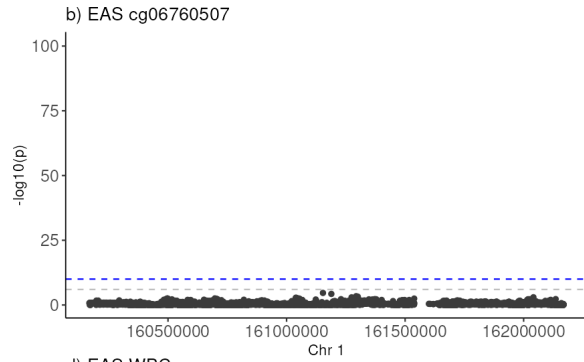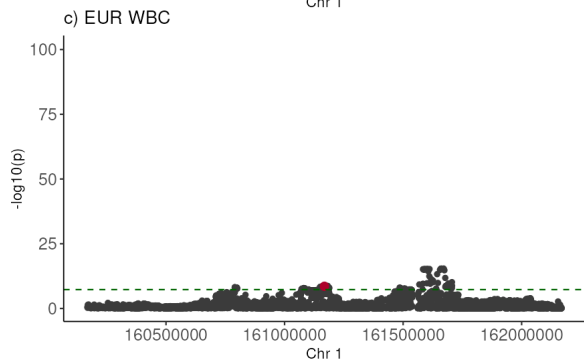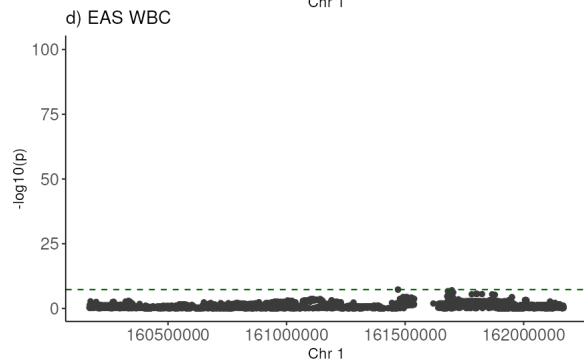

Trait WBC: probe cg11369338

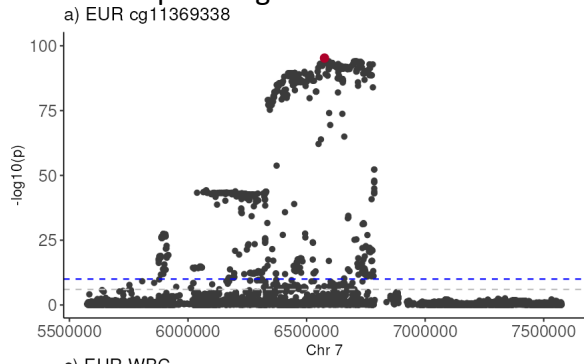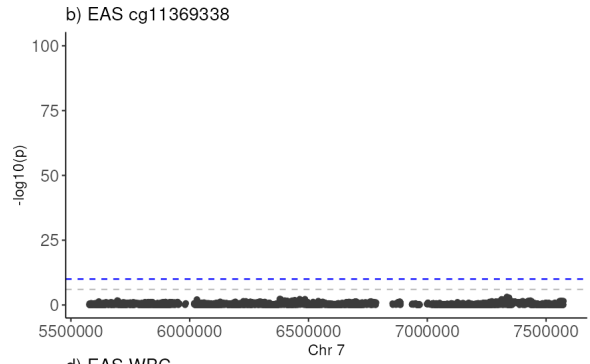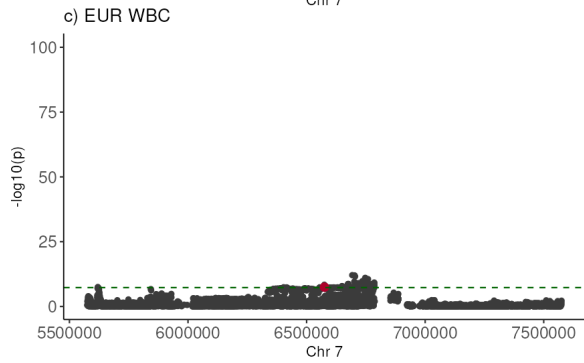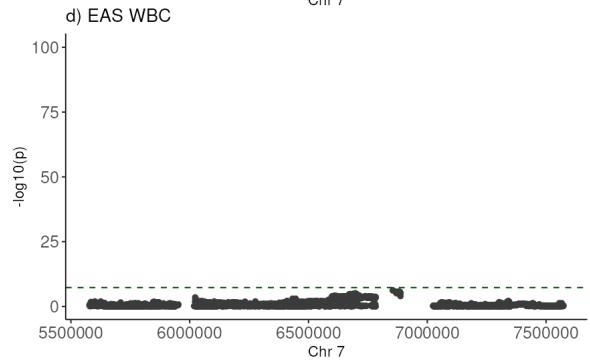

Trait WBC: probe cg07591205

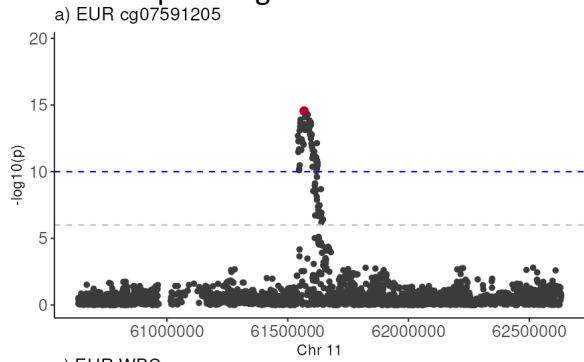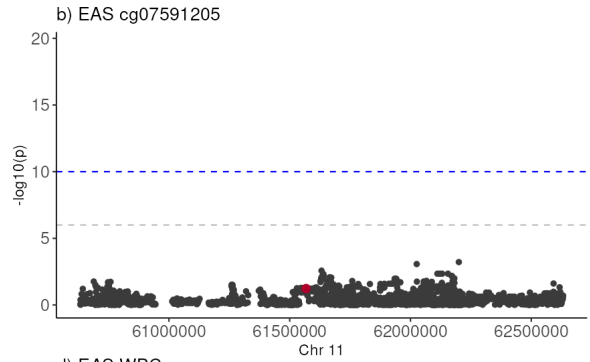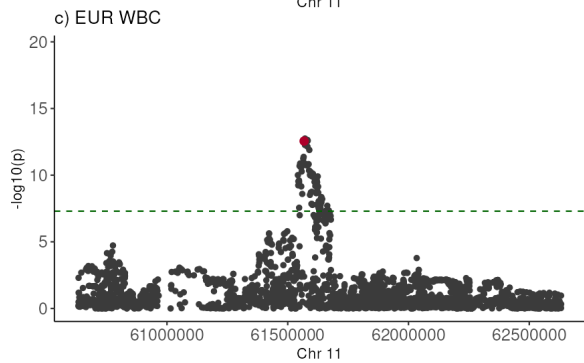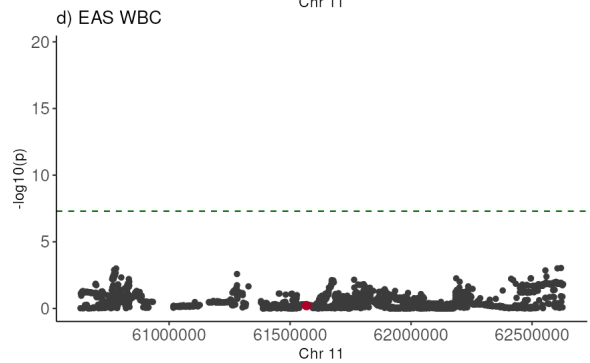

# Trait WBC: probe cg19175364

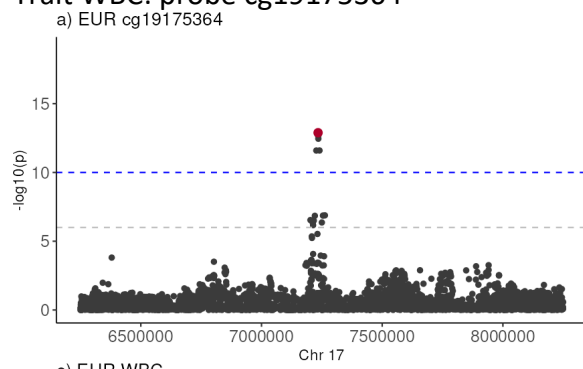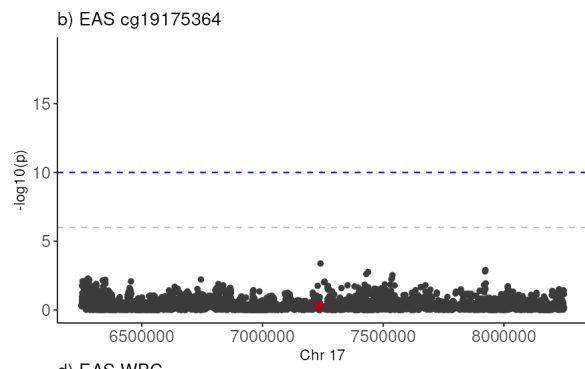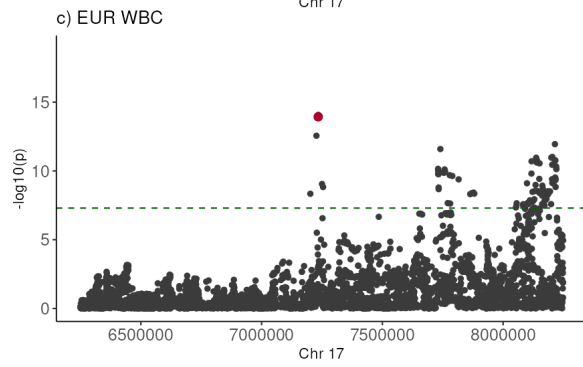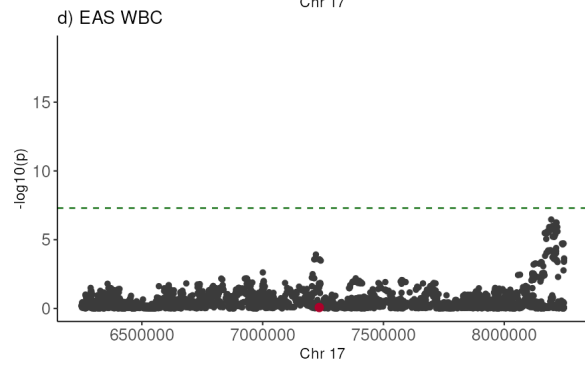

Supplement: 41467_2024_47005_MOESM1_ESM.pdf [file 41467_2024_47005_MOESM1_ESM.pdf]
